# Supplementary material for: Selective synthesis and reactivity expansion of α,β-unsaturated geminal diazides
Source: Royal Society of Chemistry journal article supplement (doi:10.1039/d2qo00008c), 2022-01-01
Supplement: d2qo00008c1.pdf [file d2qo00008c1.pdf]

## Selective synthesis and reactivity expansion of $\alpha$ , $\beta$ -unsaturated geminal diazides

Chen Chen, Jun Ge, Ling He\*

Key Laboratory of Drug-Targeting and Drug-Delivery Systems of the Ministry of Education, Department of Medicinal Chemistry, Sichuan Engineering Laboratory for Plant-Sourced Drug and Sichuan Research Center for Drug Precision Industrial Technology, Department of Medicinal Chemistry, West China School of Pharmacy, Sichuan University, Chengdu, 610041, China.

[helings2012@scu.edu.cn](mailto:helings2012@scu.edu.cn)

### Supplementary Information

|                                                                                                               |     |
|---------------------------------------------------------------------------------------------------------------|-----|
| 1. General Information.....                                                                                   | 2   |
| General remarks.....                                                                                          | 2   |
| 2. General procedures .....                                                                                   | 2   |
| General procedures A for the synthesis of 2-phenyl-2H-chromene-3-carbaldehyde derivatives 1a-1f.....          | 2   |
| General procedures B for the synthesis of cinnamaldehyde derivatives 1g-1w.....                               | 2   |
| General procedures C for the synthesis of $\alpha$ , $\beta$ -unsaturated geminal diazides 2a-2f.....         | 3   |
| General procedures D for the synthesis of $\alpha$ , $\beta$ -unsaturated bistriazoles 5b-5t.....             | 3   |
| General procedures for the synthesis of 6a.....                                                               | 3   |
| General procedures for the synthesis of 5a and 6b.....                                                        | 3   |
| General procedures E for the synthesis of $\alpha$ , $\beta$ -unsaturated bis(heterocyclyl)methane 9a-9k..... | 3   |
| General procedures F for the synthesis of (2-phenyl-2H-chromen-3-yl)methanimine derivatives 11a-11c.....      | 3   |
| 3. Experimental data .....                                                                                    | 4   |
| 4. $^1\text{H}$ -, $^{13}\text{C}$ - NMR and HRMS spectra of new compounds .....                              | 1 5 |
| 5. Crystallographic data .....                                                                                | 8 0 |
| Crystallographic data for 2a.....                                                                             | 8 0 |
| Crystallographic data for 11a.....                                                                            | 8 4 |
| 6. Optimization of The Reaction Conditions .....                                                              | 8 8 |
| 7. Antiproliferative Activity Data .....                                                                      | 9 0 |
| 8. Quantitative Transformation of $\alpha$ , $\beta$ -Unsaturated Diazides into Bistriazole .....             | 9 0 |
| References.....                                                                                               | 9 0 |

## 1. General Information

**General remarks.** Commercially available materials were purchased from Energy Chemical (Shanghai, China), Bidepharm (Shanghai, China), Titan (Shanghai, China), and were used as received without further purification. Solvents were purchased from Titan. Dichloromethane, THF, toluene, CHCl<sub>3</sub> and CH<sub>3</sub>OH were distilled after the treatment with P<sub>2</sub>O<sub>5</sub> or metal sodium. Reactions were monitored by thin-layer chromatography (TLC) carried out on commercial silica gel plates (Yantai Jiangyou Silica gel Development Co.,LTD, Yantai, China) using UV light as a visualizing agent. Commercial silica gel (Qingdao Haiyang Chemical Co.,LTD, Qingdao, China) was used for column chromatography. <sup>1</sup>H- and <sup>13</sup>C-NMR spectra were recorded on 400 MHz or 600 MHz spectrometers (Agilent Tech., Palo Alto, USA). <sup>1</sup>H-NMR spectra were referenced to Chloroform-*d* (7.26 ppm) or DMSO-*d*<sub>6</sub> (2.50 ppm), and reported as follows: Chemical shift, multiplicity (s = singlet, d = doublet, t = triplet, q = quartet, m= multiplet). Chemical shifts of the <sup>13</sup>C-NMR spectra were measured relative to chloroform-*d* (77.23 ppm) or DMSO-*d*<sub>6</sub> (39.51 ppm). Mass spectral data were obtained from Bruker Daltonics Data analysis 3.2 mass spectrometer (Bruker, Beijing, China).

**Caution! Geminal diazides are potentially hazardous and should be handled with appropriate care and safety equipment.**

## 2. General procedures

**General procedures A for the synthesis of 2-phenyl-2H-chromene-3-carbaldehyde derivatives 1a-1f.** According to the previous report,<sup>1-3</sup> salicylaldehyde derivatives (4 mmol) and unsaturated aldehydes (4.4 mmol) were taken in a round bottom flask and 5 ml of DMF was added to it followed by pyrrolidine (1.6 mmol). Then it was stirred at room temperature. The progress of the reaction was monitored by TLC and was found to be completed after 12 h. 30 ml of water was added and extracted with ethyl acetate. The combined organic layers were washed with brine (30 mL), dried over Na<sub>2</sub>SO<sub>4</sub> and concentrated in rotavapor. Column chromatography on silica gel (petroleum ether/EtOAc =10/1) was performed with hexane-ethyl acetate as eluent to afford the corresponding 2-phenyl-2H-chromene-3-carbaldehyde derivatives **1a-1f**.

**General procedures B for the synthesis of cinnamaldehyde derivatives 1g-1w.** According to the previous report,<sup>4-6</sup> benzaldehyde derivatives (1 mmol) and propanal (1.5 mmol) were added successively at room temperature to a stirred suspension of powdery KOH (1 mmol) in the EtOH (5 mL). Until the condensation was complete (TLC monitoring), 30 ml of water was added and extracted with ethyl acetate (3× 10 mL). The combined organic layers were washed with water (2× 5 mL) and dried over anhydrous Na<sub>2</sub>SO<sub>4</sub>. The solvent was evaporated under reduced pressure and the residue was purified by column chromatography on silica gel (petroleum ether/EtOAc =30/1) to

afford the corresponding products cinnamaldehyde derivatives **1g-1w**.

**General procedures C for the synthesis of  $\alpha$ ,  $\beta$ -unsaturated geminal diazides 2a-2f.** To an over-dried reaction tube were added Yb(TfO)<sub>3</sub> (0.02 mmol) and compounds **1a-1d** (0.2 mmol) under N<sub>2</sub>. Then redistilled dichloromethane (1 mL) and TMSN<sub>3</sub> (0.8 mmol) were added successively by syringe. The mixture was stirred at room temperature for 24 h. The reaction solution was condensed and purified by column chromatography on neutral aluminum oxide with hexane-ethyl acetate (30:1) as eluent to afford the corresponding  $\alpha$ ,  $\beta$ -unsaturated geminal diazides **2a-2f**.

**General procedures D for the synthesis of  $\alpha$ ,  $\beta$ -unsaturated bistriazoles 5b-5t.** To an over-dried reaction tube were added Yb(TfO)<sub>3</sub> (0.05 mmol) and compounds **1g-1w** (0.5 mmol) under N<sub>2</sub>. Then redistilled dichloromethane (2 mL) and TMSN<sub>3</sub> (2 mmol) were added successively by syringe. After stirring for 24 h in room temperature, the reaction solution was condensed and purified by column chromatography on neutral aluminum oxide (hexane/EtOAc=30/1). The crude diazides, 4-ethynylanisole (1.5 mmol), sodium L-ascorbate (0.5 mmol), CuSO<sub>4</sub>·5H<sub>2</sub>O (0.05 mmol), DMF (2 mL) was added to a round-bottom flask. The mixture was stirred for 12 h at room temperature and was monitored by TLC. Upon completion, ethyl acetate was added, and the mixture was washed with saturated aqueous NaCl and dried with Na<sub>2</sub>SO<sub>4</sub>. The solvent was removed under vacuum, and the residue was purified by column chromatography on silica gel with hexane-ethyl acetate (2:1) as eluent to afford compound  $\alpha$ ,  $\beta$ -unsaturated bistriazoles **5b-5t**.

**General procedures for the synthesis of 6a.** To a round-bottom flask were added diazide **2a** (0.2 mmol), sodium L-ascorbate (0.2 mmol), CuSO<sub>4</sub>·5H<sub>2</sub>O (0.02 mmol) and DCM (20 mL). The mixture was stirred for 12 h at room temperature and was monitored by TLC. Upon completion, the solvent was removed under vacuum, and the residue was purified by column chromatography on silica gel with hexane-ethyl acetate (5:1) as eluent to afford compound **6a**.

**General procedures for the synthesis of 5a and 6b.** To a round-bottom flask were added diazide **2a** (0.2 mmol), 4-ethynylanisole (**4a**, 0.8 mmol) or 1,7-octadiyne (**7**, 0.44 mmol), sodium L-ascorbate (0.2 mmol), CuSO<sub>4</sub>·5H<sub>2</sub>O (0.02 mmol) and DMF (5 mL). The mixture was stirred for 12 h at room temperature and was monitored by TLC. Upon completion, the solvent was removed under vacuum, and the residue was purified by column chromatography on silica gel with hexane-ethyl acetate (2:1) as eluent to afford compound **5a** or **6b**.

**General procedures E for the synthesis of  $\alpha$ ,  $\beta$ -unsaturated bis(heterocycl) methane 9a-9k.** To an over-dried reaction tube were added Cu(TfO)<sub>2</sub> (0.02 mmol), diazides **2a** or **2g** (0.2 mmol) and heterocycle **8a-8j** (0.8 mmol) under N<sub>2</sub>. Then redistilled dichloromethane (1 mL) was added by syringe. The mixture was stirred at room temperature for 5 h. The reaction solution was condensed and purified by column chromatography on silica gel with hexane-ethyl acetate (2:1) as eluent to afford the corresponding  $\alpha$ ,  $\beta$ -unsaturated bis(heterocycl) methane **9a-9k**.

**General procedures F for the synthesis of (2-phenyl-2H-chromen-3-yl)methanimine derivatives 11a-11c.** To an over-dried reaction tube were added Cu(TfO)<sub>2</sub> (0.02 mmol), diazides **2a** (0.2 mmol) and amino linked to strong electron-withdrawing group **10a-10c** (0.4 mmol) under

N<sub>2</sub>. Then redistilled dichloromethane (1 mL) was added by syringe. The mixture was stirred at room temperature for 5 h. The reaction solution was condensed and purified by column chromatography on silica gel with hexane-ethyl acetate (2:1) as eluent to afford the corresponding  $\alpha$ ,  $\beta$ -unsaturated bis(heterocyclyl)methane **11a-11c**.

### 3. Experimental data

*3-(diazidomethyl)-2-phenyl-2H-chromene (2a)*. According to the general procedure C using (0.05 g, 0.21 mmol, 1.0 equiv) 2-phenyl-2H-chromene-3-carbaldehyde **1a**, 3-(diazidomethyl)-2-phenyl-2H-chromene (0.045 g, 0.15 mmol, 70%) (**2a**) was obtained and chromatography (PE:EA=30:1) as yellow solid. TLC: R<sub>f</sub> = 0.8 (PE:EA 10:1) [UV]. <sup>1</sup>H NMR (400 MHz, DMSO-*d*<sub>6</sub>)  $\delta$  7.37 – 7.29 (m, 6H), 7.15 (td, *J* = 7.8, 1.7 Hz, 1H), 7.05 (s, 1H), 6.91 (t, *J* = 7.4 Hz, 1H), 6.70 (d, *J* = 8.0 Hz, 1H), 5.91 (s, 2H). <sup>13</sup>C NMR (101 MHz, DMSO-*d*<sub>6</sub>)  $\delta$  152.1, 138.2, 131.1, 129.5, 129.2, 129.1, 128.3, 128.0, 123.9, 122.1, 121.0, 116.5, 76.6, 75.9. HRMS (ESI-TOF) *m/z*: [M + H]<sup>+</sup> calcd for C<sub>16</sub>H<sub>13</sub>N<sub>6</sub>O: 305.1145; found 305.1147. For gram scale reaction, using (1.18 g, 5 mmol, 1.0 equiv) 2-phenyl-2H-chromene-3-carbaldehyde **1a**, 3-(diazidomethyl)-2-phenyl-2H-chromene (0.924 g, 3.04 mmol, 61%) (**2a**) was obtained.

*2-phenyl-2H-chromene-3-carbonitrile (3)*. According to the general procedure C, when using other catalyst, such as Cu(TfO)<sub>2</sub>, the Schmidt product 2-phenyl-2H-chromene-3-carbonitrile (**3**) was obtained and chromatography (PE:EA=20:1) as yellow solid. TLC: R<sub>f</sub> = 0.6 (PE:EA 10:1) [UV]. <sup>1</sup>H NMR (400 MHz, DMSO-*d*<sub>6</sub>)  $\delta$  7.77 (s, 1H), 7.45 (m, 5H), 7.33 (m, 2H), 7.02 (td, *J* = 7.8, 1.7 Hz, 1H), 6.87 (d, *J* = 8.1 Hz, 1H), 6.19 (s, 1H). <sup>13</sup>C NMR (101 MHz, DMSO-*d*<sub>6</sub>)  $\delta$  153.1, 139.2, 138.0, 133.7, 129.9, 129.4, 129.3, 127.7, 122.7, 119.7, 117.4, 116.9, 106.7, 75.4. HRMS (ESI-TOF) *m/z*: [M + H]<sup>+</sup> calcd for C<sub>16</sub>H<sub>12</sub>NO: 234.0913; found 234.0912.

*3-(diazidomethyl)-2-phenyl-2H-chromen-7-yl acetate (2b)*. According to the general procedure C using (0.06 g, 0.2 mmol, 1.0 equiv) 3-formyl-2-phenyl-2H-chromen-7-yl acetate **1b**, 3-(diazidomethyl)-2-phenyl-2H-chromen-7-yl acetate (0.038 g, 0.1 mmol, 52%) (**2b**) was obtained and chromatography (PE:EA=20:1) as colorless oil. TLC: R<sub>f</sub> = 0.5 (PE:EA 10:1) [UV]. <sup>1</sup>H NMR (400 MHz, Chloroform-*d*)  $\delta$  7.45 – 7.34 (m, 5H), 7.30 (d, *J* = 8.6 Hz, 1H), 6.74 (d, *J* = 8.6 Hz, 1H), 6.43 (dd, *J* = 10.1, 2.0 Hz, 1H), 5.94 (dd, *J* = 3.4, 1.9 Hz, 1H), 5.88 (dd, *J* = 10.0, 3.4 Hz, 1H), 5.71 (s, 1H), 2.40 (s, 3H). <sup>13</sup>C NMR (101 MHz, Chloroform-*d*)  $\delta$  168.8, 155.1, 144.1, 139.6, 128.9, 127.4, 127.3, 126.4, 119.7, 117.6, 115.6, 114.1, 77.5, 74.7, 20.6. HRMS (ESI-TOF) *m/z*: [M + NH<sub>4</sub>]<sup>+</sup> calcd for C<sub>18</sub>H<sub>18</sub>N<sub>7</sub>O<sub>3</sub>: 380.1466; found 380.1461.

*3-(diazidomethyl)-7-methoxy-2-phenyl-2H-chromene (2c)*. According to the general procedure C using (0.057 g, 0.2 mmol, 1.0 equiv) 7-methoxy-2-phenyl-2H-chromene-3-carbaldehyde **1c**, 3-(diazidomethyl)-7-methoxy-2-phenyl-2H-chromene (0.02 g, 0.059 mmol, 30%) (**2c**) was obtained and chromatography (PE:EA=30:1) as yellow oil. TLC: R<sub>f</sub> = 0.7 (PE:EA 10:1) [UV]. <sup>1</sup>H NMR (400 MHz, Chloroform-*d*)  $\delta$  7.47 – 7.33 (m, 5H), 7.24 (d, *J* = 8.5 Hz, 1H), 6.78 (dt, *J* = 9.2, 1.1 Hz, 1H), 6.67 (dd, *J* = 8.6, 0.8 Hz, 1H), 6.04 (s, 1H), 5.94 – 5.86 (m, 2H), 3.86 (s, 3H). <sup>13</sup>C NMR (101 MHz, Chloroform-*d*)  $\delta$  155.5, 153.8, 140.1, 128.8, 128.7, 127.3, 127.1, 125.1, 120.7, 118.5, 115.1, 112.5,

77.01, 73.9, 63.4. HRMS (ESI-TOF)  $m/z$ :  $[M + Na]^+$  calcd for  $C_{17}H_{14}N_6O_2Na$ : 357.1070; found 357.1069.

*3-(diazidomethyl)-8-methoxy-2-phenyl-2H-chromene (2d)*. According to the general procedure C using (0.057 g, 0.2 mmol, 1.0 equiv) 8-methoxy-2-phenyl-2H-chromene-3-carbaldehyde **1d**, 3-(diazidomethyl)-8-methoxy-2-phenyl-2H-chromene (0.041 g, 0.123 mmol, 61%) (**2d**) was obtained and chromatography (PE:EA=30:1) as yellow oil. TLC:  $R_f = 0.8$  (PE:EA 10:1) [UV].  $^1H$  NMR (400 MHz, Chloroform-*d*)  $\delta$  7.43 – 7.38 (m, 2H), 7.36 – 7.30 (m, 3H), 6.88 (s, 1H), 6.86 – 6.83 (m, 1H), 6.79 (m, 2H), 5.91 (s, 1H), 4.94 (s, 1H), 3.74 (s, 3H).  $^{13}C$  NMR (101 MHz, Chloroform-*d*)  $\delta$  148.1, 141.4, 137.8, 129.3, 128.9, 128.3, 127.7, 123.4, 121.3, 120.8, 119.9, 113.9, 77.2, 76.7, 56.2. HRMS (ESI-TOF)  $m/z$ :  $[M + NH_4]^+$  calcd for  $C_{17}H_{18}N_7O_2$ : 352.1516; found 352.1513.

*3-(diazidomethyl)-2H-chromene (2e)*. According to the general procedure C using (0.032 g, 0.2 mmol, 1.0 equiv) 2H-chromene-3-carbaldehyde **1e**, 3-(diazidomethyl)-2H-chromene (0.035 g, 0.152 mmol, 76%) (**2e**) was obtained and chromatography (PE:EA=30:1) as yellowy solid. TLC:  $R_f = 0.8$  (PE:EA 10:1) [UV].  $^1H$  NMR (400 MHz, DMSO-*d*<sub>6</sub>)  $\delta$  7.24 – 7.16 (m, 2H), 6.93 (td,  $J = 7.5, 1.2$  Hz, 1H), 6.83 (d,  $J = 8.0$  Hz, 1H), 6.77 (s, 1H), 6.08 (s, 1H), 4.73 (s, 2H).  $^{13}C$  NMR (101 MHz, DMSO)  $\delta$  153.7, 130.7, 128.3, 127.8, 123.3, 122.2, 121.4, 116.0, 77.1, 64.6. HRMS (ESI-TOF)  $m/z$ :  $[M + H]^+$  calcd for  $C_{10}H_9ON_6$ : 229.0832; found: 229.0834.

*3-(diazidomethyl)-2-methyl-2H-chromene (2f)*. According to the general procedure C using (0.035 g, 0.2 mmol, 1.0 equiv) 2-methyl-2H-chromene-3-carbaldehyde **1f**, 3-(diazidomethyl)-2-methyl-2H-chromene (0.02 g, 0.084 mmol, 42%) (**2f**) was obtained and chromatography (PE:EA=30:1) as yellow oil (it is red in Chloroform-*d*). TLC:  $R_f = 0.8$  (PE:EA 10:1) [UV].  $^1H$  NMR (400 MHz, Chloroform-*d*)  $\delta$  6.98 (td,  $J = 7.7, 1.7$  Hz, 1H), 6.88 (dd,  $J = 7.5, 1.7$  Hz, 1H), 6.70 (td,  $J = 7.5, 1.2$  Hz, 1H), 6.64 (d,  $J = 8.0$  Hz, 1H), 6.43 (s, 1H), 5.03 (s, 1H), 4.72 (q,  $J = 6.6$  Hz, 1H), 1.20 (d,  $J = 6.6$  Hz, 3H).  $^{13}C$  NMR (101 MHz,  $CDCl_3$ )  $\delta$  152.0, 130.3, 130.1, 127.4, 122.9, 121.3, 120.4, 116.4, 77.0, 70.7, 19.1. HRMS (ESI-TOF)  $m/z$ :  $[M + H]^+$  calcd for  $C_{11}H_9ON_6$ : 241.0832; found 241.0831. (two hydrogens were lost under the HRMS condition)

*1,1'-((2-phenyl-2H-chromen-3-yl)methylene)bis(4-(4-methoxyphenyl)-1H-1,2,3-triazole) (5a)*, 0.108 g, 0.191 mmol, 95%) (**2a**) was obtained and chromatography (PE:EA=2:1) as white solid. TLC:  $R_f = 0.2$  (PE:EA 2:1) [UV].  $^1H$  NMR (400 MHz, DMSO-*d*<sub>6</sub>)  $\delta$  8.86 (s, 1H), 8.70 (s, 1H), 8.08 (s, 1H), 7.81 (d,  $J = 8.4$  Hz, 2H), 7.75 (d,  $J = 8.4$  Hz, 2H), 7.32 (d,  $J = 7.6$  Hz, 1H), 7.30 – 7.14 (m, 6H), 7.06 – 6.98 (m, 4H), 6.92 (t,  $J = 7.5$  Hz, 1H), 6.78 – 6.70 (m, 2H), 5.99 (s, 1H), 3.86 – 3.71 (m, 6H).  $^{13}C$  NMR (101 MHz, DMSO-*d*<sub>6</sub>)  $\delta$  159.8, 159.8, 152.1, 147.6, 147.3, 137.2, 131.6, 129.6, 129.0, 128.7, 128.0, 127.7, 127.4, 127.3, 126.1, 122.9, 122.2, 121.1, 120.9, 120.9, 116.5, 114.8, 114.7, 76.6, 72.5, 55.7. HRMS (ESI-TOF)  $m/z$ :  $[M + Na]^+$  calcd for  $C_{34}H_{28}N_6O_3Na$ : 591.2115; found 591.2110.

*(E)-1,1'-(2-methyl-3-phenylprop-2-ene-1,1-diyl)bis(4-(4-methoxyphenyl)-1H-1,2,3-triazole) (5b)*. According to the general procedure D using (0.07 mL, 0.5 mmol, 1.0 equiv) (*E*)-2-methyl-3-phenylacrylaldehyde **1g**, (*E*)-1,1'-(2-methyl-3-phenylprop-2-ene-1,1-diyl)bis(4-(4-methoxyphenyl)-1H-1,2,3-triazole) (0.101 g, 0.21 mmol, 42%) (**5b**) was obtained and chromatography (PE:EA=10:3) as white solid. TLC:  $R_f = 0.2$  (PE:EA 10:2) [UV].  $^1H$  NMR (400

MHz, DMSO-*d*<sub>6</sub>) δ 8.81 (s, 2H), 8.29 (s, 1H), 7.87 (d, *J* = 8.8 Hz, 4H), 7.49 – 7.24 (m, 5H), 7.03 (d, *J* = 8.8 Hz, 4H), 6.38 (s, 1H), 3.80 (s, 6H), 1.97 (s, 3H). <sup>13</sup>C NMR (101 MHz, DMSO-*d*<sub>6</sub>) δ 159.8, 147.4, 135.7, 131.1, 129.7, 128.9, 128.3, 127.4, 123.1, 120.9, 114.8, 76.9, 55.7, 15.9. HRMS (ESI-TOF) *m/z*: [M + Na]<sup>+</sup> calcd for C<sub>28</sub>H<sub>26</sub>N<sub>6</sub>O<sub>2</sub>Na: 501.2009; found 501.2006.

*(E)*-1,1'-(2-benzylideneheptane-1,1-diyl)bis(4-(4-methoxyphenyl)-1*H*-1,2,3-triazole) (**5c**).

According to the general procedure D using (0.104 mL, 0.5 mmol, 1.0 equiv) (*E*)-2-methyl-3-phenylacrylaldehyde **1h**, (*E*)-1,1'-(2-benzylideneheptane-1,1-diyl)bis(4-(4-methoxyphenyl)-1*H*-1,2,3-triazole) (0.09 g, 0.168 mmol, 34%) (**5c**) was obtained and chromatography (PE:EA=10:2) as white solid. TLC: *R<sub>f</sub>* = 0.2 (PE:EA 10:1) [UV]. <sup>1</sup>H NMR (400 MHz, DMSO-*d*<sub>6</sub>) δ 8.87 (s, 2H), 8.27 (s, 1H), 7.87 (d, *J* = 8.7, 4H), 7.44 – 7.28 (m, 5H), 7.03 (d, *J* = 8.7, 4H), 6.32 (s, 1H), 3.79 (s, 6H), 2.32 (t, *J* = 7.4, 2H), 1.32 (p, *J* = 7.3 Hz, 2H), 1.19 – 1.07 (m, 4H), 0.73 (t, *J* = 6.9, 3H). <sup>13</sup>C NMR (101 MHz, DMSO-*d*<sub>6</sub>) δ 159.8, 147.4, 135.7, 131.2, 129.2, 129.0, 128.3, 127.4, 123.0, 121.1, 114.8, 75.3, 55.7, 31.5, 29.0, 27.2, 22.0, 14.1. HRMS (ESI-TOF) *m/z*: [M + Na]<sup>+</sup> calcd for C<sub>36</sub>H<sub>34</sub>N<sub>6</sub>O<sub>2</sub>Na: 557.2635; found 557.2613.

*(E)*-1,1'-(3-(2-chlorophenyl)-2-methylprop-2-ene-1,1-diyl)bis(4-(4-methoxyphenyl)-1*H*-1,2,3-triazole) (**5d**). According to the general procedure D using (0.1 g, 0.607 mmol, 1.0 equiv) (*E*)-3-(2-chlorophenyl)-2-methylacrylaldehyde **1i**, (*E*)-1,1'-(3-(2-chlorophenyl)-2-methylprop-2-ene-1,1-diyl)bis(4-(4-methoxyphenyl)-1*H*-1,2,3-triazole) (0.128 g, 0.249 mmol, 41%) (**5d**) was obtained and chromatography (PE:EA=10:2) as white solid. TLC: *R<sub>f</sub>* = 0.2 (PE:EA 10:3) [UV]. <sup>1</sup>H NMR (400 MHz, DMSO-*d*<sub>6</sub>) δ 8.82 (s, 2H), 8.39 (s, 1H), 7.87 (d, *J* = 8.7 Hz, 4H), 7.58 (dd, *J* = 7.5, 1.9 Hz, 1H), 7.51 (dd, *J* = 7.7, 1.7 Hz, 1H), 7.45 – 7.35 (m, 2H), 7.04 (d, *J* = 8.7 Hz, 4H), 6.32 (s, 1H), 3.80 (s, 6H), 1.86 (s, 3H). <sup>13</sup>C NMR (101 MHz, DMSO-*d*<sub>6</sub>) δ 159.8, 147.4, 133.8, 133.5, 133.2, 131.5, 130.2, 129.8, 127.9, 127.6, 127.4, 123.0, 120.9, 114.8, 76.2, 55.7, 15.7. HRMS (ESI-TOF) *m/z*: [M + Na]<sup>+</sup> calcd for C<sub>28</sub>H<sub>25</sub>ClN<sub>6</sub>O<sub>2</sub>Na: 535.1620; found 535.1613.

*(E)*-1,1'-(3-(3-chlorophenyl)-2-methylprop-2-ene-1,1-diyl)bis(4-(4-methoxyphenyl)-1*H*-1,2,3-triazole) (**5e**). According to the general procedure D using (0.142 g, 0.86 mmol, 1.0 equiv) (*E*)-3-(3-chlorophenyl)-2-methylacrylaldehyde **1j**, (*E*)-1,1'-(3-(3-chlorophenyl)-2-methylprop-2-ene-1,1-diyl)bis(4-(4-methoxyphenyl)-1*H*-1,2,3-triazole) (0.126 g, 0.242 mmol, 28%) (**5e**) was obtained and chromatography (PE:EA=10:2) as white solid. TLC: *R<sub>f</sub>* = 0.2 (PE:EA 10:3) [UV]. <sup>1</sup>H NMR (400 MHz, DMSO-*d*<sub>6</sub>) δ 8.82 (s, 2H), 8.30 (s, 1H), 7.87 (d, *J* = 8.8 Hz, 4H), 7.48 (s, 1H), 7.44 – 7.33 (m, 3H), 7.03 (d, *J* = 8.8 Hz, 4H), 6.36 (s, 1H), 3.79 (s, 6H), 1.95 (s, 3H). <sup>13</sup>C NMR (101 MHz, DMSO-*d*<sub>6</sub>) δ 159.8, 147.4, 137.9, 133.6, 132.7, 130.7, 129.8, 129.3, 128.3, 128.1, 127.4, 127.2, 123.1, 121.0, 114.8, 76.6, 55.7, 15.9. HRMS (ESI-TOF) *m/z*: [M + H]<sup>+</sup> calcd for C<sub>28</sub>H<sub>26</sub>ClN<sub>6</sub>O<sub>2</sub>: 513.1800; found 513.1804.

*(E)*-1,1'-(3-(4-chlorophenyl)-2-methylprop-2-ene-1,1-diyl)bis(4-(4-methoxyphenyl)-1*H*-1,2,3-triazole) (**5f**). According to the general procedure D using (0.1 g, 0.607 mmol, 1.0 equiv) (*E*)-3-(4-chlorophenyl)-2-methylacrylaldehyde **1k**, (*E*)-1,1'-(3-(4-chlorophenyl)-2-methylprop-2-ene-1,1-diyl)bis(4-(4-methoxyphenyl)-1*H*-1,2,3-triazole) (0.150 g, 0.293 mmol, 48%) (**5f**) was obtained and chromatography (PE:EA=10:2) as white solid. TLC: *R<sub>f</sub>* = 0.2 (PE:EA 10:3) [UV]. <sup>1</sup>H NMR (400 MHz, DMSO-*d*<sub>6</sub>) δ 8.81 (s, 2H), 8.29 (s, 1H), 7.87 (d, *J* = 8.8 Hz, 4H), 7.49 – 7.40 (m, 4H), 7.03 (d, *J*

= 8.8 Hz, 4H), 6.35 (s, 1H), 3.79 (s, 6H), 1.95 (s, 3H). <sup>13</sup>C NMR (101 MHz, DMSO-*d*<sub>6</sub>) δ 159.8, 147.4, 134.6, 132.8, 132.0, 131.5, 129.9, 128.9, 127.4, 127.2, 123.0, 121.0, 114.8, 76.7, 55.7, 15.9. HRMS (ESI-TOF) m/z: [M + H]<sup>+</sup> calcd for C<sub>28</sub>H<sub>26</sub>ClN<sub>6</sub>O<sub>2</sub>: 513.1800; found 513.1801.

*(E)*-1,1'-(2-methyl-3-(3-nitrophenyl)prop-2-ene-1,1-diyl)bis(4-(4-methoxyphenyl)-1*H*-1,2,3-triazole) (**5g**). According to the general procedure D using (0.144 g, 0.754 mmol, 1.0 equiv) (*E*)-2-methyl-3-(3-nitrophenyl)acrylaldehyde **1l**, (*E*)-1,1'-(2-methyl-3-(3-nitrophenyl)prop-2-ene-1,1-diyl)bis(4-(4-methoxyphenyl)-1*H*-1,2,3-triazole) (0.14 g, 0.268 mmol, 36%) (**5g**) was obtained and chromatography (PE:EA=10:3) as white solid. TLC: R<sub>f</sub> = 0.2 (PE:EA 2:1) [UV]. <sup>1</sup>H NMR (400 MHz, DMSO-*d*<sub>6</sub>) δ 8.85 (s, 2H), 8.35 (s, 1H), 8.24 (t, *J* = 2.0 Hz, 1H), 8.18 (dd, *J* = 8.1, 2.3 Hz, 1H), 7.91 – 7.83 (m, 5H), 7.70 (t, *J* = 7.9 Hz, 1H), 7.03 (d, *J* = 8.8 Hz, 4H), 6.50 (s, 1H), 3.79 (s, 6H), 1.97 (s, 3H). <sup>13</sup>C NMR (101 MHz, DMSO-*d*<sub>6</sub>) δ 159.8, 148.3, 147.5, 137.5, 136.1, 133.8, 130.4, 129.1, 127.4, 124.2, 123.1, 122.9, 121.0, 114.8, 76.4, 55.7, 15.9. HRMS (ESI-TOF) m/z: [M + Na]<sup>+</sup> calcd for C<sub>28</sub>H<sub>25</sub>N<sub>7</sub>O<sub>4</sub>Na: 546.1860; found 546.1867.

*(E)*-1,1'-(2-methyl-3-(4-nitrophenyl)prop-2-ene-1,1-diyl)bis(4-(4-methoxyphenyl)-1*H*-1,2,3-triazole) (**5h**). According to the general procedure D using (0.31 g, 1.62 mmol, 1.0 equiv) (*E*)-2-methyl-3-(4-nitrophenyl)acrylaldehyde **1m**, (*E*)-1,1'-(2-methyl-3-(4-nitrophenyl)prop-2-ene-1,1-diyl)bis(4-(4-methoxyphenyl)-1*H*-1,2,3-triazole) (0.442 g, 0.84 mmol, 52%) (**5h**) was obtained and chromatography (PE:EA=10:3) as white solid. TLC: R<sub>f</sub> = 0.2 (PE:EA 2:1) [UV]. <sup>1</sup>H NMR (400 MHz, DMSO-*d*<sub>6</sub>) δ 8.84 (s, 2H), 8.37 (s, 1H), 8.25 (d, *J* = 8.4 Hz, 2H), 7.87 (d, *J* = 8.3 Hz, 4H), 7.68 (d, *J* = 8.4 Hz, 2H), 7.03 (d, *J* = 8.3 Hz, 4H), 6.47 (s, 1H), 3.80 (s, 6H), 1.98 (s, 3H). <sup>13</sup>C NMR (101 MHz, DMSO-*d*<sub>6</sub>) δ 159.8, 147.5, 146.9, 142.7, 134.9, 131.0, 129.3, 127.4, 123.9, 123.0, 121.0, 114.8, 76.4, 55.7, 16.1. HRMS (ESI-TOF) m/z: [M + H]<sup>+</sup> calcd for C<sub>28</sub>H<sub>26</sub>N<sub>7</sub>O<sub>4</sub>: 524.2041; found 524.2036.

*(E)*-1,1'-(3-(2-methoxyphenyl)-2-methylprop-2-ene-1,1-diyl)bis(4-(4-methoxyphenyl)-1*H*-1,2,3-triazole) (**5i**). According to the general procedure D using (0.14 g, 0.794 mmol, 1.0 equiv) (*E*)-3-(2-methoxyphenyl)-2-methylacrylaldehyde **1n**, (*E*)-1,1'-(3-(2-methoxyphenyl)-2-methylprop-2-ene-1,1-diyl)bis(4-(4-methoxyphenyl)-1*H*-1,2,3-triazole) (0.251 g, 0.494 mmol, 62%) (**5i**) was obtained and chromatography (PE:EA=10:2) as white solid. TLC: R<sub>f</sub> = 0.2 (PE:EA 10:3) [UV]. <sup>1</sup>H NMR (400 MHz, DMSO-*d*<sub>6</sub>) δ 8.81 (s, 2H), 8.32 (s, 1H), 7.89 (d, *J* = 8.3 Hz, 4H), 7.42 (d, *J* = 7.5 Hz, 1H), 7.33 (t, *J* = 7.5 Hz, 1H), 7.09 – 6.95 (m, 6H), 6.41 (s, 1H), 3.80 (s, 6H), 3.72 (s, 3H), 1.89 (s, 3H). <sup>13</sup>C NMR (101 MHz, DMSO-*d*<sub>6</sub>) δ 159.8, 157.3, 147.4, 130.7, 130.6, 130.0, 127.4, 127.0, 124.1, 123.1, 120.9, 120.5, 114.8, 111.5, 76.8, 55.9, 55.7, 15.9. HRMS (ESI-TOF) m/z: [M + Na]<sup>+</sup> calcd for C<sub>29</sub>H<sub>28</sub>N<sub>6</sub>O<sub>3</sub>Na: 531.2115; found 531.2122.

*(E)*-1,1'-(3-(3-methoxyphenyl)-2-methylprop-2-ene-1,1-diyl)bis(4-(4-methoxyphenyl)-1*H*-1,2,3-triazole) (**5j**). According to the general procedure D using (0.158 g, 0.9 mmol, 1.0 equiv) (*E*)-3-(3-methoxyphenyl)-2-methylacrylaldehyde **1o**, (*E*)-1,1'-(3-(3-methoxyphenyl)-2-methylprop-2-ene-1,1-diyl)bis(4-(4-methoxyphenyl)-1*H*-1,2,3-triazole) (0.166 g, 0.327 mmol, 36%) (**5j**) was obtained and chromatography (PE:EA=10:2) as white solid. TLC: R<sub>f</sub> = 0.2 (PE:EA 10:3) [UV]. <sup>1</sup>H NMR (400 MHz, DMSO-*d*<sub>6</sub>) δ 8.81 (s, 2H), 8.28 (s, 1H), 7.85 (d, *J* = 8.7 Hz, 4H), 7.32 (t, *J* = 7.8 Hz, 1H), 7.03 (d, *J* = 8.7 Hz, 4H), 6.98 – 6.86 (m, 3H), 6.36 (s, 1H), 3.79 (s, 6H), 3.76 (s, 3H), 1.96 (s, 3H). <sup>13</sup>C NMR (101 MHz, DMSO-*d*<sub>6</sub>) δ 159.8, 159.6, 147.4, 137.1, 131.6, 131.0, 129.9, 127.3, 123.0, 122.0,

120.9, 114.9, 114.8, 114.0, 76.8, 55.6, 15.9. HRMS (ESI-TOF)  $m/z$ :  $[M + Na]^+$  calcd for  $C_{29}H_{28}N_6O_3Na$ : 531.2115; found 531.2119.

*(E)-1,1'-(2,3-diphenylprop-2-ene-1,1-diyl)bis(4-(4-methoxyphenyl)-1H-1,2,3-triazole)* (**5k**). According to the general procedure D using (0.104 g, 0.5 mmol, 1.0 equiv) (*E*)-2,3-diphenylacrylaldehyde **1p**, (*E*)-1,1'-(2,3-diphenylprop-2-ene-1,1-diyl)bis(4-(4-methoxyphenyl)-1H-1,2,3-triazole) (0.082 g, 0.152 mmol, 30%) (**5k**) was obtained and chromatography (PE:EA=10:2) as white solid. TLC:  $R_f$  = 0.2 (PE:EA 10:3) [UV].  $^1H$  NMR (400 MHz, DMSO- $d_6$ )  $\delta$  8.94 (s, 2H), 8.71 (s, 1H), 7.84 (d,  $J$  = 8.4 Hz, 4H), 7.46 – 7.39 (m, 2H), 7.38 – 7.24 (m, 4H), 7.19 – 7.11 (m, 2H), 7.03 (d,  $J$  = 8.6, 4H), 6.97 – 6.90 (m, 2H), 6.32 (s, 1H), 3.79 (s, 6H).  $^{13}C$  NMR (101 MHz, DMSO- $d_6$ )  $\delta$  159.8, 147.3, 135.9, 135.3, 134.9, 131.4, 129.9, 129.7, 129.4, 129.0, 128.6, 127.3, 123.0, 121.4, 114.8, 75.8, 55.67. HRMS (ESI-TOF)  $m/z$ :  $[M + Na]^+$  calcd for  $C_{33}H_{28}N_6O_2Na$ : 563.2166; found 563.2165.

*(E)-1,1'-(2-(4-methoxyphenyl)-3-phenylprop-2-ene-1,1-diyl)bis(4-(4-methoxyphenyl)-1H-1,2,3-triazole)* (**5l**). According to the general procedure D using (0.1g, 0.42 mmol, 1.0 equiv) (*E*)-2-(4-methoxyphenyl)-3-phenylacrylaldehyde **1q**, (*E*)-1,1'-(2-(4-methoxyphenyl)-3-phenylprop-2-ene-1,1-diyl)bis(4-(4-methoxyphenyl)-1H-1,2,3-triazole) (0.125 g, 0.218 mmol, 52%) (**5l**) was obtained and chromatography (PE:EA=10:2) as white solid. TLC:  $R_f$  = 0.2 (PE:EA 10:3) [UV].  $^1H$  NMR (400 MHz, DMSO- $d_6$ )  $\delta$  8.92 (s, 2H), 8.66 (s, 1H), 7.83 (d,  $J$  = 8.7 Hz, 4H), 7.35 (d,  $J$  = 8.5 Hz, 2H), 7.21 – 7.12 (m, 3H), 7.02 (d,  $J$  = 8.7 Hz, 4H), 6.99 – 6.93 (m, 2H), 6.88 (d,  $J$  = 8.5 Hz, 2H), 6.25 (s, 1H), 3.79 (s, 6H), 3.71 (s, 3H).  $^{13}C$  NMR (101 MHz, DMSO- $d_6$ )  $\delta$  158.7, 158.5, 146.1, 134.1, 133.9, 129.9, 128.7, 127.6, 127.4, 126.6, 126.2, 121.9, 120.2, 113.7, 74.7, 54.6, 54.4. HRMS (ESI-TOF)  $m/z$ :  $[M + Na]^+$  calcd for  $C_{34}H_{30}N_6O_3Na$ : 593.2272; found 593.2262.

*(E)-1,1'-(3-(furan-2-yl)-2-methylprop-2-ene-1,1-diyl)bis(4-(4-methoxyphenyl)-1H-1,2,3-triazole)* (**5m**). According to the general procedure D using (0.1 mL, 0.8 mmol, 1.0 equiv) (*E*)-3-(furan-2-yl)-2-methylacrylaldehyde **1r**, (*E*)-1,1'-(3-(furan-2-yl)-2-methylprop-2-ene-1,1-diyl)bis(4-(4-methoxyphenyl)-1H-1,2,3-triazole) (0.138 g, 0.294 mmol, 37%) (**5m**) was obtained and chromatography (PE:EA=10:2) as white solid. TLC:  $R_f$  = 0.2 (PE:EA 10:3) [UV].  $^1H$  NMR (400 MHz, DMSO- $d_6$ )  $\delta$  8.78 (s, 2H), 8.30 (s, 1H), 7.87 (d,  $J$  = 8.8 Hz, 4H), 7.77 (d,  $J$  = 1.8 Hz, 1H), 7.03 (d,  $J$  = 8.8 Hz, 4H), 6.69 (d,  $J$  = 3.4 Hz, 1H), 6.60 (dd,  $J$  = 3.5, 1.9 Hz, 1H), 6.14 (s, 1H), 3.80 (s, 6H), 2.08 (s, 3H).  $^{13}C$  NMR (101 MHz, DMSO- $d_6$ )  $\delta$  159.8, 151.1, 147.4, 144.1, 128.4, 127.4, 123.0, 120.9, 119.3, 114.8, 113.0, 112.5, 76.7, 55.7, 16.3. HRMS (ESI-TOF)  $m/z$ :  $[M + Na]^+$  calcd for  $C_{26}H_{24}N_6O_3Na$ : 491.1802; found 491.1786.

*(E)-1,1'-(2-methyl-3-(thiophen-2-yl)prop-2-ene-1,1-diyl)bis(4-(4-methoxyphenyl)-1H-1,2,3-triazole)* (**5n**). According to the general procedure D using (0.105 g, 0.69 mmol, 1.0 equiv) (*E*)-2-methyl-3-(thiophen-2-yl)acrylaldehyde **1s**, (*E*)-1,1'-(2-methyl-3-(thiophen-2-yl)prop-2-ene-1,1-diyl)bis(4-(4-methoxyphenyl)-1H-1,2,3-triazole) (0.109 g, 0.227 mmol, 33%) (**5n**) was obtained and chromatography (PE:EA=10:2) as white solid. TLC:  $R_f$  = 0.2 (PE:EA 10:3) [UV].  $^1H$  NMR (400 MHz, DMSO- $d_6$ )  $\delta$  8.78 (s, 2H), 8.29 (s, 1H), 7.86 (d,  $J$  = 8.7 Hz, 4H), 7.71 (d,  $J$  = 5.1 Hz, 1H), 7.26 (d,  $J$  = 3.6 Hz, 1H), 7.14 (dd,  $J$  = 5.1, 3.7 Hz, 1H), 7.02 (d,  $J$  = 8.7 Hz, 4H), 6.63 (s, 1H), 3.79 (s, 6H), 2.08 (s, 3H).  $^{13}C$  NMR (101 MHz, DMSO- $d_6$ )  $\delta$  159.8, 147.4, 138.4, 130.8, 128.7, 128.0, 127.4,



124.8, 123.1, 120.9, 114.8, 77.0, 55.7, 16.4. HRMS (ESI-TOF)  $m/z$ :  $[M + Na]^+$  calcd for  $C_{26}H_{24}N_6O_2SNa$ : 507.1574; found 507.1586.

*(E)*-1,1'-(2-methyl-3-(naphthalen-1-yl)prop-2-ene-1,1-diyl)bis(4-(4-methoxyphenyl)-1*H*-1,2,3-triazole) (**5o**). According to the general procedure D using (0.06 g, 0.31 mmol, 1.0 equiv) (*E*)-2-methyl-3-(naphthalen-1-yl)acrylaldehyde **1t**, (*E*)-1,1'-(2-methyl-3-(naphthalen-1-yl)prop-2-ene-1,1-diyl)bis(4-(4-methoxyphenyl)-1*H*-1,2,3-triazole) (0.068 g, 0.129 mmol, 42%) (**5o**) was obtained and chromatography (PE:EA=10:2) as white solid. TLC:  $R_f$  = 0.2 (PE:EA 10:1) [UV].  $^1H$  NMR (400 MHz, DMSO- $d_6$ )  $\delta$  8.92 (s, 2H), 8.46 (s, 1H), 8.00 – 7.86 (m, 6H), 7.86 – 7.80 (m, 1H), 7.60 – 7.52 (m, 4H), 7.04 (d,  $J$  = 8.5 Hz, 4H), 6.81 (s, 1H), 3.80 (s, 6H), 1.82 (s, 3H).  $^{13}C$  NMR (101 MHz, DMSO- $d_6$ )  $\delta$  159.8, 147.5, 133.6, 133.3, 132.7, 131.5, 129.2, 129.0, 128.6, 127.4, 127.4, 127.0, 126.6, 125.9, 124.7, 123.0, 121.0, 114.8, 76.5, 55.7, 15.7. HRMS (ESI-TOF)  $m/z$ :  $[M + Na]^+$  calcd for  $C_{32}H_{28}N_6O_2Na$ : 551.2166; found 551.2163.

*(E)*-1,1'-(3-(6-methoxynaphthalen-1-yl)-2-methylprop-2-ene-1,1-diyl)bis(4-(4-methoxyphenyl)-1*H*-1,2,3-triazole) (**5p**). According to the general procedure D using (0.03 g, 0.13 mmol, 1.0 equiv) (*E*)-3-(6-methoxynaphthalen-1-yl)-2-methylacrylaldehyde **1u**, (*E*)-1,1'-(3-(6-methoxynaphthalen-1-yl)-2-methylprop-2-ene-1,1-diyl)bis(4-(4-methoxyphenyl)-1*H*-1,2,3-triazole) (0.046 g, 0.083 mmol, 64%) (**5p**) was obtained and chromatography (PE:EA=10:2) as white solid. TLC:  $R_f$  = 0.2 (PE:EA 10:3) [UV].  $^1H$  NMR (400 MHz, DMSO- $d_6$ )  $\delta$  8.85 (s, 2H), 8.33 (s, 1H), 7.91 – 7.80 (m, 7H), 7.50 (dd,  $J$  = 8.6, 1.8 Hz, 1H), 7.33 (d,  $J$  = 2.5 Hz, 1H), 7.18 (dd,  $J$  = 9.0, 2.5 Hz, 1H), 7.04 (d,  $J$  = 8.5 Hz, 4H), 6.46 (s, 1H), 3.88 (s, 3H), 3.79 (s, 6H), 2.06 (s, 3H).  $^{13}C$  NMR (101 MHz, DMSO- $d_6$ )  $\delta$  158.7, 157.2, 146.3, 133.0, 130.1, 129.8, 129.5, 129.0, 127.7, 127.6, 126.9, 126.3, 126.1, 122.0, 119.9, 118.4, 113.7, 105.2, 76.0, 54.6, 54.6, 15.0. HRMS (ESI-TOF)  $m/z$ :  $[M + Na]^+$  calcd for  $C_{33}H_{30}N_6O_3Na$ : 581.2272; found 581.2275.

*(E)*-1,1'-(3-(anthracen-9-yl)-2-methylprop-2-ene-1,1-diyl)bis(4-(4-methoxyphenyl)-1*H*-1,2,3-triazole) (**5q**). According to the general procedure D using (0.044 mg, 0.18 mmol, 1.0 equiv) (*E*)-3-(anthracen-9-yl)-2-methylacrylaldehyde **1v**, (*E*)-1,1'-(3-(anthracen-9-yl)-2-methylprop-2-ene-1,1-diyl)bis(4-(4-methoxyphenyl)-1*H*-1,2,3-triazole) (0.045 g, 0.077 mmol, 43%) (**5q**) was obtained and chromatography (PE:EA=10:2) as yellow solid. TLC:  $R_f$  = 0.2 (PE:EA 10:3) [UV].  $^1H$  NMR (400 MHz, DMSO- $d_6$ )  $\delta$  8.97 (s, 2H), 8.64 (d,  $J$  = 5.3 Hz, 2H), 8.18 – 8.07 (m, 4H), 7.92 (d,  $J$  = 8.5 Hz, 4H), 7.64 – 7.53 (m, 4H), 7.04 (d,  $J$  = 8.4 Hz, 4H), 6.93 (s, 1H), 3.80 (s, 6H), 3.34 (s, 3H).  $^{13}C$  NMR (101 MHz, DMSO- $d_6$ )  $\delta$  159.8, 147.6, 135.9, 131.3, 129.7, 129.3, 129.1, 127.8, 127.4, 126.8, 126.0, 125.9, 123.0, 121.2, 114.8, 76.1, 55.7, 15.9. HRMS (ESI-TOF)  $m/z$ :  $[M + H]^+$  calcd for  $C_{36}H_{31}N_6O_2$ : 579.2503; found 579.2508.

*(E)*-1,1'-(3-(2,6-dichlorophenyl)-2-methylprop-2-ene-1,1-diyl)bis(4-(4-methoxyphenyl)-1*H*-1,2,3-triazole) (**5r**). According to the general procedure D using (0.4 g, 1.4 mmol, 1.0 equiv) (*E*)-3-(2,6-dichlorophenyl)-2-methylacrylaldehyde **1w**, (*E*)-1,1'-(3-(2,6-dichlorophenyl)-2-methylprop-2-ene-1,1-diyl)bis(4-(4-methoxyphenyl)-1*H*-1,2,3-triazole) (0.395 g, 0.722 mmol, 52%) (**5r**) was obtained and chromatography (PE:EA=10:2) as white solid. TLC:  $R_f$  = 0.2 (PE:EA 10:3) [UV].  $^1H$  NMR (400 MHz, DMSO- $d_6$ )  $\delta$  8.75 (s, 2H), 8.48 (s, 1H), 7.87 (d,  $J$  = 8.7 Hz, 4H), 7.55 (d,  $J$  = 8.0 Hz, 2H), 7.41 (t,  $J$  = 8.1 Hz, 1H), 7.04 (d,  $J$  = 8.7 Hz, 4H), 6.21 (s, 1H), 3.80 (s, 6H), 1.63 (s, 3H).  $^{13}C$  NMR (101

MHz, DMSO-*d*<sub>6</sub>) δ 159.9, 147.5, 136.1, 134.2, 133.2, 131.0, 128.8, 127.4, 126.3, 122.9, 120.7, 114.9, 75.5, 55.7, 15.8. HRMS (ESI-TOF) *m/z*: [M + Na]<sup>+</sup> calcd for C<sub>28</sub>H<sub>24</sub>N<sub>6</sub>O<sub>2</sub>Cl<sub>2</sub>Na:569.1230; found 569.1216.

*(E)-1,1'-(3-phenylprop-2-ene-1,1-diyl)bis(4-(4-methoxyphenyl)-1H-1,2,3-triazole)* (**5s**). According to the general procedure D using (0.185 g, 1.4 mmol, 1.0 equiv) cinnamaldehyde **1x**, *(E)-1,1'-(3-phenylprop-2-ene-1,1-diyl)bis(4-(4-methoxyphenyl)-1H-1,2,3-triazole)* (0.332 g, 0.714 mmol, 51%) (**5s**) was obtained and chromatography (PE:EA=10:2) as white solid. TLC: R<sub>f</sub> = 0.2 (PE:EA 10:5) [UV]. <sup>1</sup>H NMR (400 MHz, DMSO-*d*<sub>6</sub>) δ 8.95 (s, 2H), 8.30 (d, *J* = 7.7 Hz, 1H), 7.84 (d, *J* = 11.4 Hz, 4H), 7.65 (d, *J* = 7.5 Hz, 2H), 7.47 – 7.32 (m, 4H), 7.11 (d, *J* = 15.7 Hz, 1H), 7.03 (d, *J* = 8.5 Hz, 4H), 3.79 (s, 6H). <sup>13</sup>C NMR (101 MHz, DMSO) δ 159.8, 147.5, 137.7, 135.1, 129.7, 129.3, 127.9, 127.3, 123.1, 121.3, 120.0, 114.8, 73.0, 55.6. HRMS (ESI-TOF) *m/z*: [M + H]<sup>+</sup> calcd for C<sub>27</sub>H<sub>25</sub>N<sub>6</sub>O<sub>2</sub>:465.2034; found 465.2035.

*(E)-1,1'-(but-2-ene-1,1-diyl)bis(4-(4-methoxyphenyl)-1H-1,2,3-triazole)* (**5t**). According to the general procedure D using (0.1 g, 1.4 mmol, 1.0 equiv) crotonaldehyde **1x**, *(E)-1,1'-(but-2-ene-1,1-diyl)bis(4-(4-methoxyphenyl)-1H-1,2,3-triazole)* (0.248 g, 0.616 mmol, 44%) (**5t**) was obtained and chromatography (PE:EA=10:2) as white solid. TLC: R<sub>f</sub> = 0.1 (PE:EA 10:5) [UV]. <sup>1</sup>H NMR (400 MHz, DMSO-*d*<sub>6</sub>) δ 8.95 (s, 1H), 8.65 (s, 1H), 7.87 – 7.75 (m, 4H), 7.67 (d, *J* = 14.3 Hz, 1H), 7.09 – 6.98 (m, 4H), 6.75 (dd, *J* = 14.3, 7.5 Hz, 1H), 5.67 (p, *J* = 6.9 Hz, 1H), 3.80 (s, 6H), 1.81 (d, *J* = 6.8 Hz, 3H). <sup>13</sup>C NMR (101 MHz, DMSO) δ 159.5, 147.3, 127.3, 127.0, 123.8, 123.0, 121.2, 119.5, 118.3, 114.8, 76.7, 55.6, 21.1. HRMS (ESI-TOF) *m/z*: [M + H]<sup>+</sup> calcd for C<sub>22</sub>H<sub>23</sub>N<sub>6</sub>O<sub>2</sub>:403.1877; found 403.1876.

*1-(azido(2-phenyl-2H-chromen-3-yl)methyl)-4-(4-methoxyphenyl)-1H-1,2,3-triazole* (**6a**). According to General procedures for the synthesis of 6a, **6a** (0.03 g, 0.069 mmol, 34%) was obtained and chromatography (PE:EA=10:1) as white solid. TLC: R<sub>f</sub> = 0.5 (PE:EA 10:2) [UV]. <sup>1</sup>H NMR (400 MHz, DMSO-*d*<sub>6</sub>) δ 8.67 (s, 1H), 7.80 (d, *J* = 8.5 Hz, 2H), 7.37 (dd, *J* = 7.5, 1.6 Hz, 1H), 7.34 – 7.23 (m, 5H), 7.23 – 7.14 (m, 2H), 7.05 – 6.91 (m, 4H), 6.72 (d, *J* = 8.0 Hz, 1H), 5.67 (s, 1H), 3.79 (s, 3H). <sup>13</sup>C NMR (101 MHz, DMSO-*d*<sub>6</sub>) δ 159.8, 152.1, 147.6, 137.5, 131.3, 129.6, 129.1, 128.5, 128.1, 127.9, 127.3, 124.9, 123.1, 122.2, 121.0, 119.7, 116.4, 114.8, 75.9, 73.6, 55.7. HRMS (ESI-TOF) *m/z*: [M + Na]<sup>+</sup> calcd for C<sub>25</sub>H<sub>20</sub>N<sub>6</sub>O<sub>2</sub>Na:459.1540; found 459.1535.

*1,1'-((2-phenyl-2H-chromen-3-yl)methylene)bis(4-(hex-5-yn-1-yl)-1H-1,2,3-triazole)* (**6b**). According to the general procedure for the synthesis of 5a and 6b, (0.045 g, 0.088 mmol, 44%) (**6b**) was obtained and chromatography (PE:EA=10:1) as white solid. TLC: R<sub>f</sub> = 0.4 (PE:EA 10:3) [UV]. <sup>1</sup>H NMR (400 MHz, DMSO-*d*<sub>6</sub>) δ 8.19 (s, 1H), 8.04 (s, 1H), 7.98 (s, 1H), 7.33 – 7.21 (m, 4H), 7.20 – 7.12 (m, 3H), 6.91 (t, *J* = 7.4 Hz, 1H), 6.72 (d, *J* = 8.0 Hz, 1H), 6.53 (s, 1H), 5.85 (s, 1H), 2.76 (t, *J* = 2.6 Hz, 2H), 2.61 (t, *J* = 7.5 Hz, 2H), 2.55 (t, *J* = 7.6 Hz, 2H), 2.17 (tt, *J* = 6.9, 3.1 Hz, 4H), 1.69 – 1.55 (m, 4H), 1.44 (h, *J* = 7.3 Hz, 4H). <sup>13</sup>C NMR (101 MHz, DMSO-*d*<sub>6</sub>) δ 151.9, 148.0, 147.7, 137.1, 131.5, 129.6, 129.0, 128.5, 128.3, 127.9, 125.5, 122.7, 122.4, 122.2, 120.9, 116.5, 84.9, 76.6, 71.9, 71.8, 28.2, 28.1, 27.9, 27.9, 24.8, 24.7, 17.9. HRMS (ESI-TOF) *m/z*: [M + Na]<sup>+</sup> calcd for C<sub>32</sub>H<sub>32</sub>N<sub>6</sub>ONa:539.2530; found 539.2525.

*3,3'-((2-phenyl-2H-chromen-3-yl)methylene)bis(1H-pyrrole)* (**9a**). According to the general procedure E using (0.05 g, 0.16 mmol, 1.0 equiv) 3-(diazidomethyl)-2-phenyl-2H-chromene **2a**, *3,3'-((2-phenyl-2H-chromen-3-yl)methylene)bis(1H-pyrrole)* (0.040 g, 0.11 mmol, 71%) (**5p**) was obtained and chromatography (PE:EA=10:5) as brown solid. TLC:  $R_f$  = 0.2 (PE:EA 10:3) [UV].  $^1\text{H}$  NMR (400 MHz, DMSO- $d_6$ )  $\delta$  10.67 (d,  $J$  = 3.0 Hz, 1H), 10.47 (d,  $J$  = 3.0 Hz, 1H), 7.35 – 7.27 (m, 5H), 7.06 – 6.99 (m, 2H), 6.84 – 6.78 (m, 1H), 6.69 – 6.59 (m, 3H), 6.27 (s, 1H), 5.99 – 5.88 (m, 3H), 5.75 (s, 1H), 5.58 (s, 1H), 4.55 (s, 1H).  $^{13}\text{C}$  NMR (101 MHz, DMSO)  $\delta$  151.4, 138.7, 138.3, 130.6, 130.2, 129.3, 129.0, 128.2, 126.9, 122.6, 121.7, 120.2, 117.8, 117.6, 116.0, 107.7, 107.6, 107.2, 106.6, 78.4, 41.4. HRMS (ESI-TOF)  $m/z$ :  $[\text{M} + \text{H}]^+$  calcd for  $\text{C}_{24}\text{H}_{21}\text{N}_2\text{O}$ : 353.1648; found 353.1646.

*1,1'-(((2-phenyl-2H-chromen-3-yl)methylene)bis(1H-pyrrole-4,2-diyl))bis(propan-1-one)* (**9b**). According to the general procedure E using (0.05 g, 0.16 mmol, 1.0 equiv) 3-(diazidomethyl)-2-phenyl-2H-chromene **2a**, *1,1'-(((2-phenyl-2H-chromen-3-yl)methylene)bis(1H-pyrrole-4,2-diyl))bis(propan-1-one)* (0.035 g, 0.084 mmol, 53%) (**9b**) was obtained and chromatography (PE:EA=10:5) as brown solid. TLC:  $R_f$  = 0.2 (PE:EA 10:3) [UV].  $^1\text{H}$  NMR (400 MHz, DMSO- $d_6$ )  $\delta$  11.80 (s, 1H), 11.66 (s, 1H), 7.24 (s, 5H), 7.11 – 7.01 (m, 2H), 6.89 (dd,  $J$  = 3.7, 2.3 Hz, 1H), 6.87 – 6.80 (m, 2H), 6.64 (d,  $J$  = 8.0 Hz, 1H), 6.36 (s, 1H), 6.06 (dd,  $J$  = 3.7, 2.3 Hz, 1H), 6.03 (dd,  $J$  = 3.7, 2.3 Hz, 1H), 5.64 (s, 1H), 4.90 (s, 1H), 2.70 (dq,  $J$  = 11.5, 7.4 Hz, 4H), 1.05 (td,  $J$  = 7.4, 1.8 Hz, 6H).  $^{13}\text{C}$  NMR (101 MHz, DMSO)  $\delta$  190.4, 151.5, 138.2, 138.0, 137.2, 135.6, 131.9, 131.6, 129.7, 128.9, 128.7, 128.2, 127.1, 122.4, 121.8, 121.6, 117.0, 116.9, 116.1, 110.2, 109.8, 78.6, 41.2, 30.7, 9.5. HRMS (ESI-TOF)  $m/z$ :  $[\text{M} + \text{H}]^+$  calcd for  $\text{C}_{30}\text{H}_{29}\text{N}_2\text{O}_3$ : 465.2173; found 465.2169.

*3,3'-((2-phenyl-2H-chromen-3-yl)methylene)bis(1H-indole)* (**9c**). According to the general procedure E using (0.05 g, 0.16 mmol, 1.0 equiv) 3-(diazidomethyl)-2-phenyl-2H-chromene **2a**, *3,3'-((2-phenyl-2H-chromen-3-yl)methylene)bis(1H-indole)* (0.032 g, 0.071 mmol, 44%) (**9b**) was obtained and chromatography (PE:EA=10:5) as brown solid. TLC:  $R_f$  = 0.2 (PE:EA 10:3) [UV].  $^1\text{H}$  NMR (400 MHz, DMSO- $d_6$ )  $\delta$  11.03 (d,  $J$  = 2.5 Hz, 1H), 10.82 (d,  $J$  = 2.5 Hz, 1H), 7.45 – 7.27 (m, 10H), 7.09 – 6.92 (m, 6H), 6.91 – 6.82 (m, 2H), 6.81 – 6.74 (m, 2H), 6.63 (d,  $J$  = 8.0 Hz, 1H), 6.27 (s, 1H), 5.78 (s, 1H), 4.90 (s, 1H).  $^{13}\text{C}$  NMR (101 MHz, DMSO)  $\delta$  151.5, 139.6, 139.6, 137.3, 136.9, 129.4, 129.2, 129.1, 128.0, 127.2, 126.9, 126.8, 125.1, 124.0, 122.4, 121.5, 121.5, 121.4, 119.3, 118.9, 118.8, 115.8, 115.2, 115.2, 112.1, 112.1, 79.5, 36.9. HRMS (ESI-TOF)  $m/z$ :  $[\text{M} + \text{H}]^+$  calcd for  $\text{C}_{32}\text{H}_{25}\text{N}_2\text{O}$ : 453.1961; found 453.1959.

*3,3'-((2-phenyl-2H-chromen-3-yl)methylene)bis(4-methyl-1H-indole)* (**9d**). According to the general procedure E using (0.05 g, 0.16 mmol, 1.0 equiv) 3-(diazidomethyl)-2-phenyl-2H-chromene **2a**, *3,3'-((2-phenyl-2H-chromen-3-yl)methylene)bis(1H-indole)* (0.050 g, 0.104 mmol, 63%) (**9d**) was obtained and chromatography (PE:EA=10:5) as brown solid. TLC:  $R_f$  = 0.2 (PE:EA 10:3) [UV].  $^1\text{H}$  NMR (400 MHz, DMSO- $d_6$ )  $\delta$  10.99 (d,  $J$  = 2.5 Hz, 1H), 10.78 (d,  $J$  = 2.6 Hz, 1H), 7.35 – 7.26 (m, 1H), 7.26 – 7.20 (m, 3H), 7.19 – 7.05 (m, 5H), 6.98 – 6.75 (m, 5H), 6.57 (d,  $J$  = 7.1 Hz, 2H), 6.41 (d,  $J$  = 2.5 Hz, 1H), 6.01 (s, 1H), 5.89 (s, 1H), 5.44 (s, 1H), 2.13 (s, 3H), 1.97 (s, 3H).  $^{13}\text{C}$  NMR (101 MHz, DMSO)  $\delta$  152.7, 142.1, 140.4, 137.6, 129.8, 129.8, 129.3, 129.0, 128.6, 127.3, 127.0, 126.8, 125.4, 124.9, 123.8, 122.4, 121.6, 121.6, 121.3, 120.5, 119.9, 117.1, 117.0, 115.6, 110.1, 110.1, 80.6, 38.9, 19.9, 19.6. HRMS (ESI-TOF)  $m/z$ :  $[\text{M} + \text{H}]^+$  calcd for  $\text{C}_{34}\text{H}_{29}\text{N}_2\text{O}$ : 481.2274; found 481.2272.

*3,3'-((2-phenyl-2H-chromen-3-yl)methylene)bis(5-methoxy-1H-indole)* (**9e**). According to the general procedure E using (0.05 g, 0.16 mmol, 1.0 equiv) 3-(diazidomethyl)-2-phenyl-2H-chromene **2a**, *3,3'-((2-phenyl-2H-chromen-3-yl)methylene)bis(5-methoxy-1H-indole)* (0.068 g, 0.133 mmol, 81%) (**9e**) was obtained and chromatography (PE:EA=10:5) as brown solid. TLC:  $R_f$  = 0.2 (PE:EA 10:3) [UV].  $^1\text{H}$  NMR (400 MHz, DMSO- $d_6$ )  $\delta$  10.91 (d,  $J$  = 2.5 Hz, 1H), 10.68 (d,  $J$  = 2.5 Hz, 1H), 7.47 – 7.38 (m, 5H), 7.31 (dd,  $J$  = 5.6, 3.2 Hz, 2H), 7.24 (d,  $J$  = 8.8 Hz, 1H), 7.02 (td,  $J$  = 7.7, 1.6 Hz, 1H), 6.97 (dd,  $J$  = 7.6, 1.6 Hz, 1H), 6.82 – 6.72 (m, 4H), 6.69 (dd,  $J$  = 8.7, 2.4 Hz, 1H), 6.63 (d,  $J$  = 8.0 Hz, 1H), 6.42 (d,  $J$  = 2.4 Hz, 1H), 6.23 (s, 1H), 5.74 (s, 1H), 4.80 (s, 1H), 3.56 (d,  $J$  = 3.4 Hz, 6H).  $^{13}\text{C}$  NMR (101 MHz, DMSO)  $\delta$  153.4, 153.3, 151.5, 140.0, 139.3, 132.5, 132.0, 129.4, 129.2, 127.8, 127.6, 127.0, 126.9, 125.8, 124.9, 122.3, 121.6, 118.8, 115.8, 114.8, 114.6, 112.8, 111.8, 111.2, 101.5, 100.2, 79.5, 55.7, 36.9, 31.2. HRMS (ESI-TOF)  $m/z$ :  $[\text{M} + \text{H}]^+$  calcd for  $\text{C}_{34}\text{H}_{29}\text{N}_2\text{O}_3\text{Na}$ : 513.2173; found 513.2169.

*3,3'-((2-phenyl-2H-chromen-3-yl)methylene)bis(2-methyl-1H-indole)* (**9f**). According to the general procedure E using (0.05 g, 0.16 mmol, 1.0 equiv) 3-(diazidomethyl)-2-phenyl-2H-chromene **2a**, *3,3'-((2-phenyl-2H-chromen-3-yl)methylene)bis(2-methyl-1H-indole)* (0.019 g, 0.040 mmol, 25%) (**9f**) was obtained and chromatography (PE:EA=10:5) as brown solid. TLC:  $R_f$  = 0.2 (PE:EA 10:3) [UV].  $^1\text{H}$  NMR (400 MHz, DMSO- $d_6$ )  $\delta$  10.87 (s, 1H), 10.81 (s, 1H), 7.47 (d,  $J$  = 8.0 Hz, 1H), 7.39 – 7.34 (m, 3H), 7.29 – 7.19 (m, 4H), 7.04 (td,  $J$  = 7.7, 1.7 Hz, 1H), 7.00 – 6.83 (m, 5H), 6.78 (td,  $J$  = 7.5, 1.1 Hz, 1H), 6.67 (dt,  $J$  = 7.6, 3.5 Hz, 2H), 6.20 (d,  $J$  = 1.9 Hz, 1H), 5.78 (s, 1H), 4.81 (d,  $J$  = 1.9 Hz, 1H), 2.16 (s, 3H), 2.01 (s, 3H).  $^{13}\text{C}$  NMR (101 MHz, DMSO)  $\delta$  151.6, 139.5, 139.4, 135.6, 135.5, 133.4, 132.5, 129.4, 129.3, 129.1, 128.9, 128.4, 127.9, 126.9, 122.2, 121.6, 120.3, 120.2, 120.2, 119.0, 118.6, 118.4, 115.9, 111.1, 111.0, 110.3, 108.6, 79.6, 36.5, 12.3, 12.0. HRMS (ESI-TOF)  $m/z$ :  $[\text{M} + \text{H}]^+$  calcd for  $\text{C}_{34}\text{H}_{29}\text{N}_2\text{O}$ : 481.2274; found 481.2272.

*3,3'-((2-phenyl-2H-chromen-3-yl)methylene)bis(1H-indole-5-carbonitrile)* (**9g**). According to the general procedure E using (0.05 g, 0.16 mmol, 1.0 equiv) 3-(diazidomethyl)-2-phenyl-2H-chromene **2a**, *3,3'-((2-phenyl-2H-chromen-3-yl)methylene)bis(1H-indole-5-carbonitrile)* (0.022 g, 0.044 mmol, 27%) (**9g**) was obtained and chromatography (PE:EA=10:5) as brown solid. TLC:  $R_f$  = 0.2 (PE:EA 10:3) [UV].  $^1\text{H}$  NMR (400 MHz, DMSO- $d_6$ )  $\delta$  11.65 (d,  $J$  = 2.4 Hz, 1H), 11.47 (d,  $J$  = 2.4 Hz, 1H), 7.90 (d,  $J$  = 1.6 Hz, 1H), 7.61 – 7.49 (m, 3H), 7.45 – 7.31 (m, 7H), 7.29 (d,  $J$  = 1.5 Hz, 1H), 7.11 (d,  $J$  = 2.3 Hz, 1H), 7.08 – 6.99 (m, 2H), 6.80 (td,  $J$  = 7.4, 1.2 Hz, 1H), 6.67 (d,  $J$  = 8.0 Hz, 1H), 6.33 (s, 1H), 5.83 (s, 1H), 5.14 (s, 1H).  $^{13}\text{C}$  NMR (101 MHz, DMSO)  $\delta$  151.6, 139.4, 139.0, 138.9, 138.7, 129.5, 129.5, 129.0, 128.0, 127.6, 127.1, 127.0, 127.0, 126.4, 125.0, 124.7, 124.4, 124.2, 122.3, 121.6, 121.2, 121.0, 120.0, 116.2, 116.1, 116.0, 113.4, 100.9, 79.2, 36.2, 31.2. HRMS (ESI-TOF)  $m/z$ :  $[\text{M} + \text{NH}_4]^+$  calcd for  $\text{C}_{34}\text{H}_{26}\text{N}_5\text{O}$ : 520.2132; found 520.2133.

*3,3'-((2-phenyl-2H-chromen-3-yl)methylene)bis(5-chloro-1H-indole)* (**9h**). According to the general procedure E using (0.05 g, 0.16 mmol, 1.0 equiv) 3-(diazidomethyl)-2-phenyl-2H-chromene **2a**, *3,3'-((2-phenyl-2H-chromen-3-yl)methylene)bis(5-chloro-1H-indole)* (0.055 g, 0.103 mmol, 64%) (**9h**) was obtained and chromatography (PE:EA=10:5) as brown solid. TLC:  $R_f$  = 0.2 (PE:EA 10:3) [UV].  $^1\text{H}$  NMR (400 MHz, DMSO- $d_6$ )  $\delta$  11.28 (d,  $J$  = 2.5 Hz, 1H), 11.07 (d,  $J$  = 2.5 Hz, 1H), 7.47 – 7.35 (m, 8H), 7.30 (d,  $J$  = 2.1 Hz, 1H), 7.11 – 6.97 (m, 4H), 6.88 (dd,  $J$  = 14.9, 2.3 Hz, 2H), 6.79 (td,  $J$

= 7.4, 1.2 Hz, 1H), 6.66 (d,  $J$  = 8.0 Hz, 1H), 6.26 (s, 1H), 5.80 (s, 1H), 4.91 (s, 1H).  $^{13}\text{C}$  NMR (101 MHz, DMSO)  $\delta$  151.6, 139.5, 139.1, 135.8, 135.5, 129.5, 129.4, 129.1, 128.3, 128.0, 127.8, 127.0, 126.8, 126.0, 123.6, 123.6, 122.3, 121.6, 121.6, 121.5, 119.5, 118.4, 118.2, 115.9, 114.9, 114.7, 113.8, 113.6, 79.3, 36.6. HRMS (ESI-TOF)  $m/z$ :  $[\text{M} + \text{H}]^+$  calcd for  $\text{C}_{32}\text{H}_{23}\text{N}_2\text{OCl}_2$ : 521.1182; found 521.1178.

*dimethyl 3,3'-((2-phenyl-2H-chromen-3-yl)methylene)bis(1H-indole-6-carboxylate)* (**9i**).

According to the general procedure E using (0.035 g, 0.115 mmol, 1.0 equiv) 3-(diazidomethyl)-2-phenyl-2H-chromene **2a**, *dimethyl 3,3'-((2-phenyl-2H-chromen-3-yl)methylene)bis(1H-indole-6-carboxylate)* (0.050 g, 0.088 mmol, 77%) (**9i**) was obtained and chromatography (PE:EA=10:5) as brown solid. TLC:  $R_f$  = 0.2 (PE:EA 10:3) [UV].  $^1\text{H}$  NMR (400 MHz, DMSO- $d_6$ )  $\delta$  11.49 (d,  $J$  = 2.6 Hz, 1H), 11.30 (d,  $J$  = 2.6 Hz, 1H), 8.07 (d,  $J$  = 1.5 Hz, 1H), 8.02 (d,  $J$  = 1.5 Hz, 1H), 7.61 (d,  $J$  = 2.5 Hz, 1H), 7.54 – 7.45 (m, 2H), 7.41 – 7.34 (m, 6H), 7.10 – 7.00 (m, 3H), 6.97 (dd,  $J$  = 7.5, 1.6 Hz, 1H), 6.78 (t,  $J$  = 7.4 Hz, 1H), 6.65 (d,  $J$  = 8.0 Hz, 1H), 6.27 (s, 1H), 5.79 (s, 1H), 4.99 (s, 1H), 3.84 (s, 6H).  $^{13}\text{C}$  NMR (101 MHz, DMSO)  $\delta$  167.7, 151.6, 139.4, 139.0, 136.5, 136.2, 130.6, 130.1, 129.4, 129.1, 129.0, 128.3, 128.0, 127.0, 122.7, 122.5, 122.3, 121.6, 119.8, 119.7, 119.6, 119.0, 118.6, 115.9, 115.7, 115.5, 114.2, 79.4, 52.3, 36.7. HRMS (ESI-TOF)  $m/z$ :  $[\text{M} + \text{Na}]^+$  calcd for  $\text{C}_{36}\text{H}_{28}\text{N}_2\text{O}_5\text{Na}$ : 591.1890; found 591.1894.

*(E)-3,3'-(2-methyl-3-phenylprop-2-ene-1,1-diyl)bis(1H-pyrrole)* (**9j**). According to the general procedure E using (0.1 g, 0.47 mmol, 1.0 equiv) (E)-(3,3-diaziido-2-methylprop-1-en-1-yl)benzene **2g**, *(E)-3,3'-(2-methyl-3-phenylprop-2-ene-1,1-diyl)bis(1H-pyrrole)* (0.050 g, 0.19 mmol, 41%) (**9j**) was obtained and chromatography (PE:EA=10:5) as brown solid. TLC:  $R_f$  = 0.2 (PE:EA 10:3) [UV].  $^1\text{H}$  NMR (400 MHz, DMSO- $d_6$ )  $\delta$  10.70 (s, 1H), 10.56 (s, 1H), 7.35 – 7.27 (m, 2H), 7.25 – 7.17 (m, 3H), 6.70 – 6.61 (m, 2H), 6.11 – 5.99 (m, 3H), 5.93 (d,  $J$  = 2.7 Hz, 1H), 5.63 (d,  $J$  = 2.2 Hz, 1H), 4.80 (s, 1H), 1.83 (s, 3H).  $^{13}\text{C}$  NMR (151 MHz,  $\text{cdCl}_3$ )  $\delta$  147.8, 139.6, 137.4, 134.8, 133.8, 133.3, 131.4, 123.3, 123.2, 122.4, 122.1, 113.8, 112.6, 112.2, 111.7, 58.9, 24.1. HRMS (ESI-TOF)  $m/z$ :  $[\text{M} + \text{H}]^+$  calcd for  $\text{C}_{18}\text{H}_{19}\text{N}_2$ : 263.1543; found 263.1541.

*3-(di(furan-3-yl)methyl)-2-phenyl-2H-chromene* (**9k**). According to the general procedure E using (0.05 g, 0.16 mmol, 1.0 equiv) 3-(diazidomethyl)-2-phenyl-2H-chromene **2a**, *3-(di(furan-3-yl)methyl)-2-phenyl-2H-chromene* (0.036 g, 0.10 mmol, 64%) (**9k**) was obtained and chromatography (PE:EA=20:1) as colorless oil. TLC:  $R_f$  = 0.7 (PE:EA 10:1) [UV].  $^1\text{H}$  NMR (400 MHz, DMSO- $d_6$ )  $\delta$  7.61 (dd,  $J$  = 1.9, 0.9 Hz, 1H), 7.58 (dd,  $J$  = 1.9, 0.9 Hz, 1H), 7.33 – 7.25 (m, 5H), 7.11 (dd,  $J$  = 7.5, 1.7 Hz, 1H), 7.06 (td,  $J$  = 7.8, 1.7 Hz, 1H), 6.84 (td,  $J$  = 7.5, 1.2 Hz, 1H), 6.64 (d,  $J$  = 8.0 Hz, 1H), 6.44 – 6.37 (m, 3H), 6.31 (d,  $J$  = 3.2 Hz, 1H), 6.12 (d,  $J$  = 3.3 Hz, 1H), 5.72 (s, 1H), 4.82 (s, 1H).  $^{13}\text{C}$  NMR (101 MHz, DMSO)  $\delta$  151.9, 151.6, 151.4, 143.3, 143.1, 138.2, 134.3, 129.9, 129.2, 129.0, 128.1, 127.3, 122.1, 121.9, 121.8, 116.2, 111.1, 111.0, 108.6, 78.0, 42.0. HRMS (ESI-TOF)  $m/z$ :  $[\text{M} + \text{H}]^+$  calcd for  $\text{C}_{24}\text{H}_{19}\text{O}_3$ : 355.1329; found 355.1326.

*(E)-N-((2-phenyl-2H-chromen-3-yl)methylene)cyanamide* (**11a**). According to the general procedure F using (0.09 g, 0.3 mmol, 1.0 equiv) 3-(diazidomethyl)-2-phenyl-2H-chromene **2a**, *(E)-N-((2-phenyl-2H-chromen-3-yl)methylene)cyanamide* (0.040 g, 0.154 mmol, 51%) (**11a**) was obtained and chromatography (PE:EA=10:3) as yellow solid. TLC:  $R_f$  = 0.2 (PE:EA 10:1) [UV].  $^1\text{H}$  NMR (400 MHz, DMSO- $d_6$ )  $\delta$  9.09 (s, 1H), 7.97 (s, 1H), 7.49 (dd,  $J$  = 7.7, 1.7 Hz, 1H), 7.41 – 7.29 (m, 6H), 7.01 (td,  $J$  =

7.4, 1.1 Hz, 1H), 6.88 (d,  $J = 8.2$  Hz, 1H), 6.34 (s, 1H).  $^{13}\text{C}$  NMR (101 MHz, DMSO)  $\delta$  182.7, 154.8, 145.4, 138.3, 135.1, 130.8, 129.4, 129.1, 127.6, 122.7, 121.0, 117.5, 116.5, 73.7. HRMS (ESI-TOF)  $m/z$ :  $[\text{M} + \text{H}]^+$  calcd for  $\text{C}_{17}\text{H}_{13}\text{N}_2\text{O}$ : 261.1022; found 261.1019.

*(E)-N-((2-phenyl-2H-chromen-3-yl)methylene)methanesulfonamide (11b)*. According to the general procedure F using (0.05 g, 0.16 mmol, 1.0 equiv) 3-(diazidomethyl)-2-phenyl-2H-chromene **2a**, *(E)-N-((2-phenyl-2H-chromen-3-yl)methylene)methanesulfonamide* (0.03 g, 0.115 mmol, 70%) (**11b**) was obtained and chromatography (PE:EA=10:3) as yellow soild. TLC:  $R_f = 0.2$  (PE:EA 10:1) [UV].  $^1\text{H}$  NMR (400 MHz, DMSO- $d_6$ )  $\delta$  8.83 (s, 1H), 8.07 (s, 1H), 7.42 (dd,  $J = 7.6, 1.7$  Hz, 1H), 7.38 – 7.27 (m, 6H), 7.00 (td,  $J = 7.5, 1.1$  Hz, 1H), 6.91 (d,  $J = 8.1$  Hz, 1H), 6.36 (s, 1H), 3.08 (s, 3H).  $^{13}\text{C}$  NMR (101 MHz,  $\text{CDCl}_3$ )  $\delta$  168.7, 155.1, 143.3, 138.5, 134.4, 129.6, 129.4, 128.8, 128.5, 127.0, 122.0, 120.3, 117.4, 74.9, 40.3. HRMS (ESI-TOF)  $m/z$ :  $[\text{M} + \text{Na}]^+$  calcd for  $\text{C}_{17}\text{H}_{15}\text{NO}_3\text{SNa}$ : 336.0665; found 336.0670.

*(E)-N-((2-phenyl-2H-chromen-3-yl)methylene)-4-(trifluoromethyl)benzenesulfonamide (11c)*. According to the general procedure F using (0.05 g, 0.16 mmol, 1.0 equiv) 3-(diazidomethyl)-2-phenyl-2H-chromene **2a**, *(E)-N-((2-phenyl-2H-chromen-3-yl)methylene)-4-(trifluoromethyl)benzenesulfonamide* (0.028 g, 0.062 mmol, 39%) (**11c**) was obtained and chromatography (PE:EA=10:3) as yellow soild. TLC:  $R_f = 0.2$  (PE:EA 10:1) [UV].  $^1\text{H}$  NMR (400 MHz, DMSO- $d_6$ )  $\delta$  8.94 (s, 1H), 8.14 (s, 1H), 8.01 – 7.91 (m, 4H), 7.43 (dd,  $J = 7.7, 1.7$  Hz, 1H), 7.36 (td,  $J = 7.5, 1.5$  Hz, 1H), 7.26 – 7.17 (m, 5H), 7.01 (td,  $J = 7.6, 1.1$  Hz, 1H), 6.88 (d,  $J = 8.2$  Hz, 1H), 6.32 (s, 1H).  $^{13}\text{C}$  NMR (101 MHz, DMSO- $d_6$ )  $\delta$  171.4, 154.8, 146.0, 142.6, 138.7, 135.1, 130.7, 129.4, 129.1, 128.9, 128.7, 127.1 (q,  $J = 3.6$  Hz), 123.8 (q,  $J = 274.1$  Hz), 122.7, 120.9, 117.4, 74.3. HRMS (ESI-TOF)  $m/z$ :  $[\text{M} + \text{Na}]^+$  calcd for  $\text{C}_{23}\text{H}_{17}\text{NO}_3\text{F}_3\text{S}$ : 444.0876; found 444.0875.

## 4. <sup>1</sup>H-, <sup>13</sup>C- NMR and HRMS spectra of new compounds

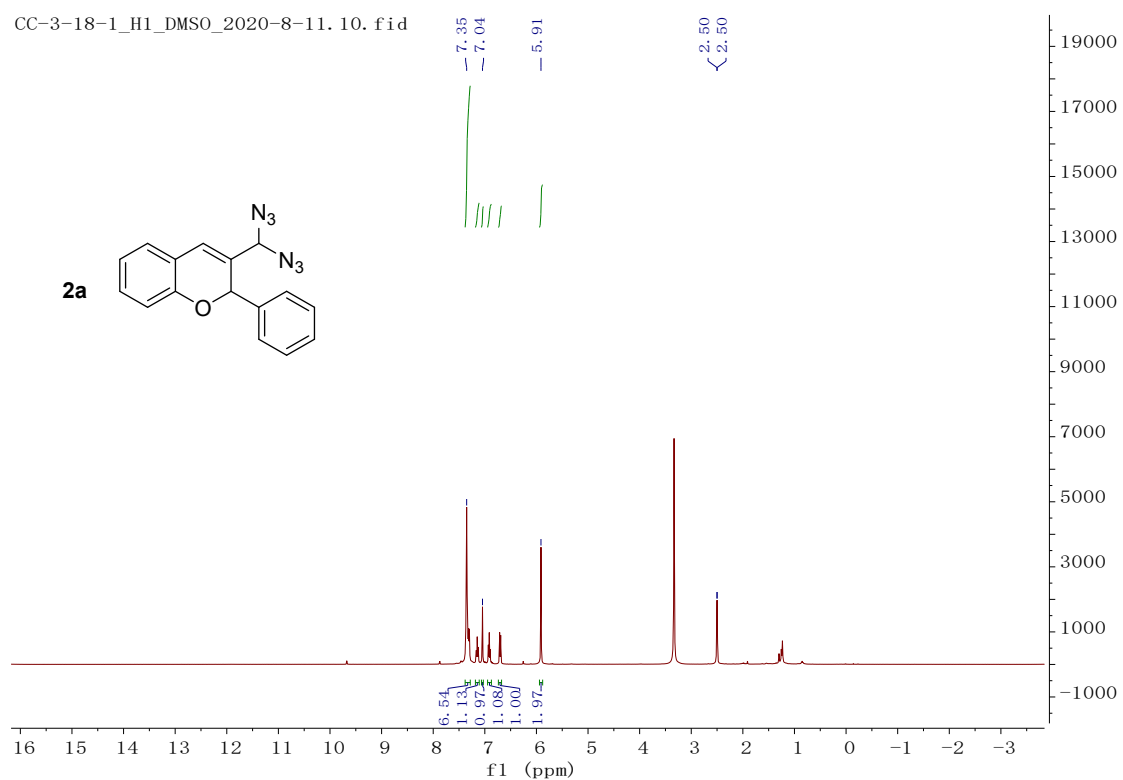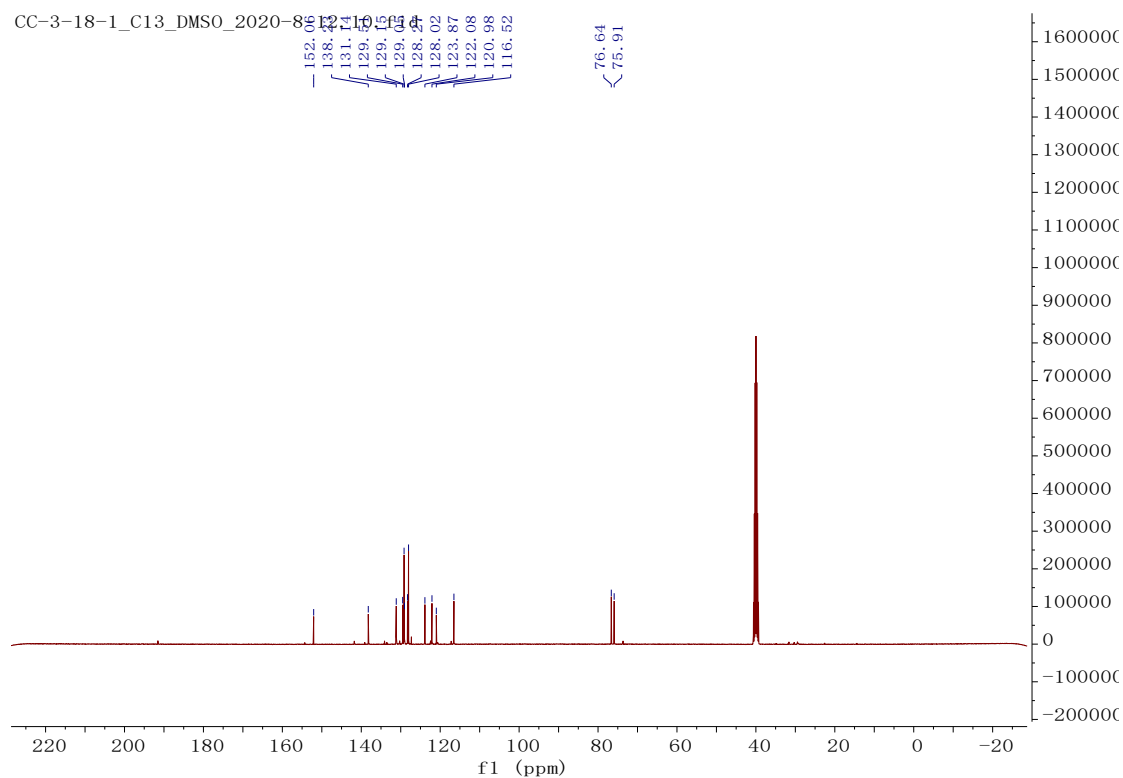

CC-4-38 #17 RT: 0.14 AV: 1 NL: 3.23E6  
T: FTMS + p ESI Full ms [100.0000-1000.0000]

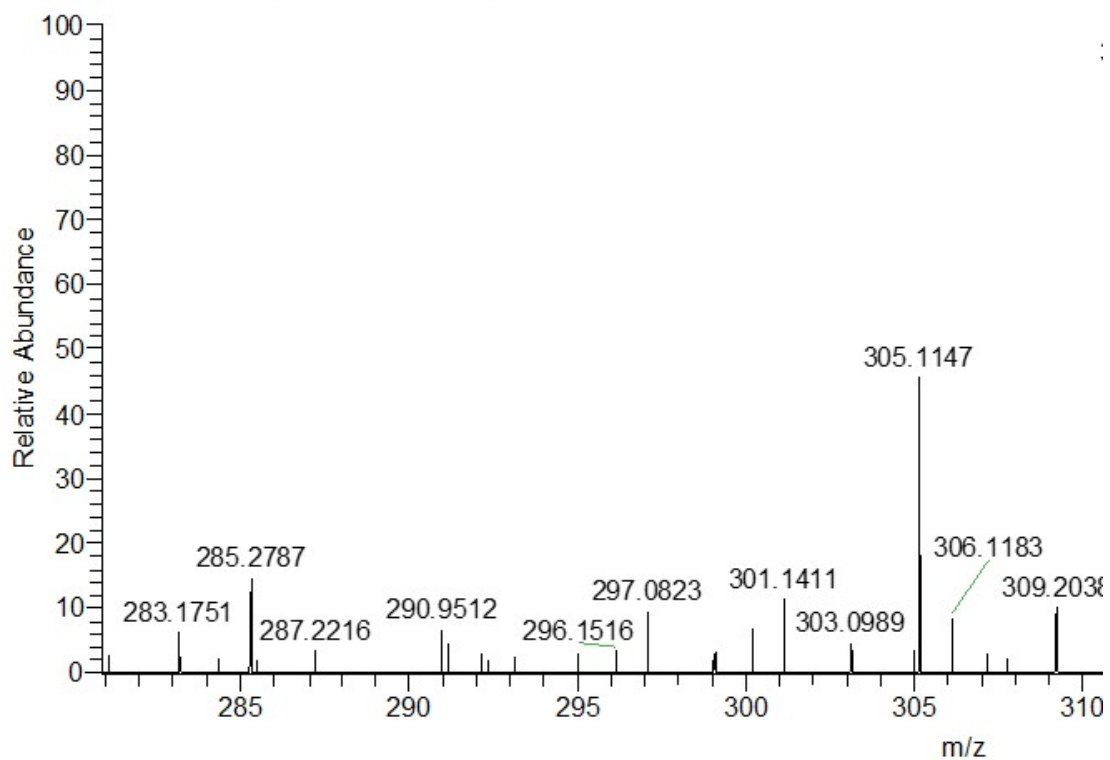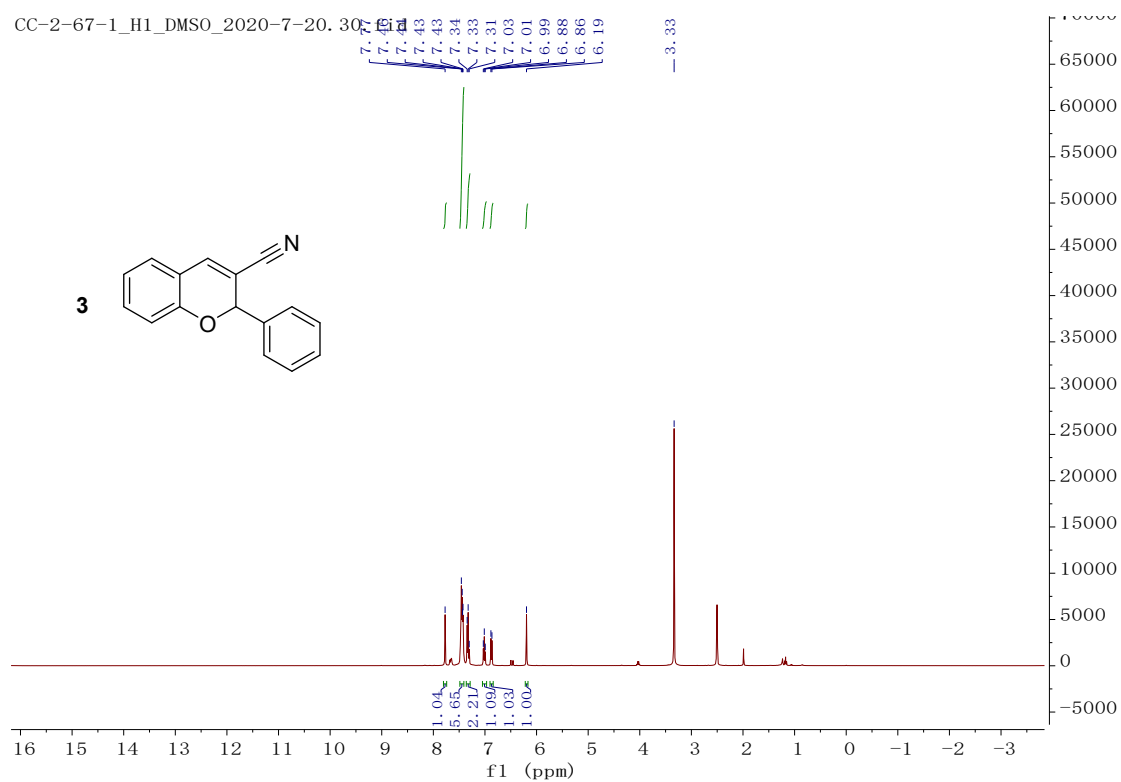



CC-2-67-1-DMSO-C13-2020

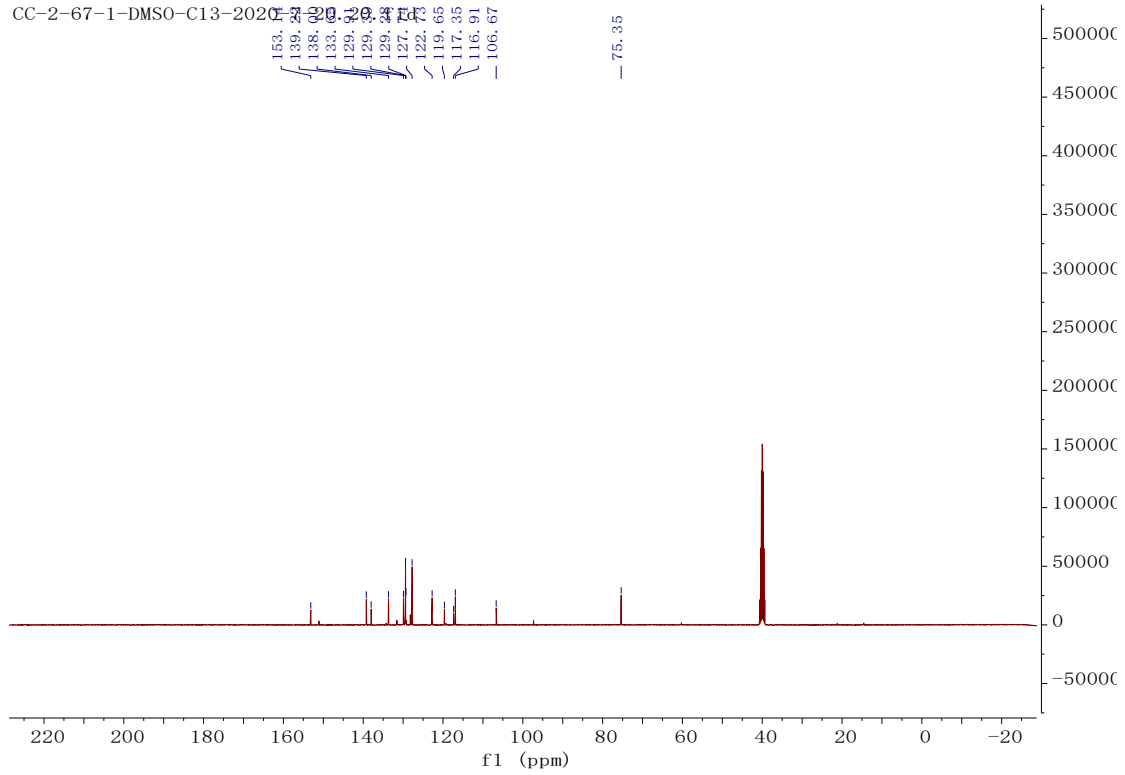

23 #154 RT: 2.4205 AV: 1 NL: 5.56E6  
T: FTMS + p NSI Full ms [50.00-800.00]

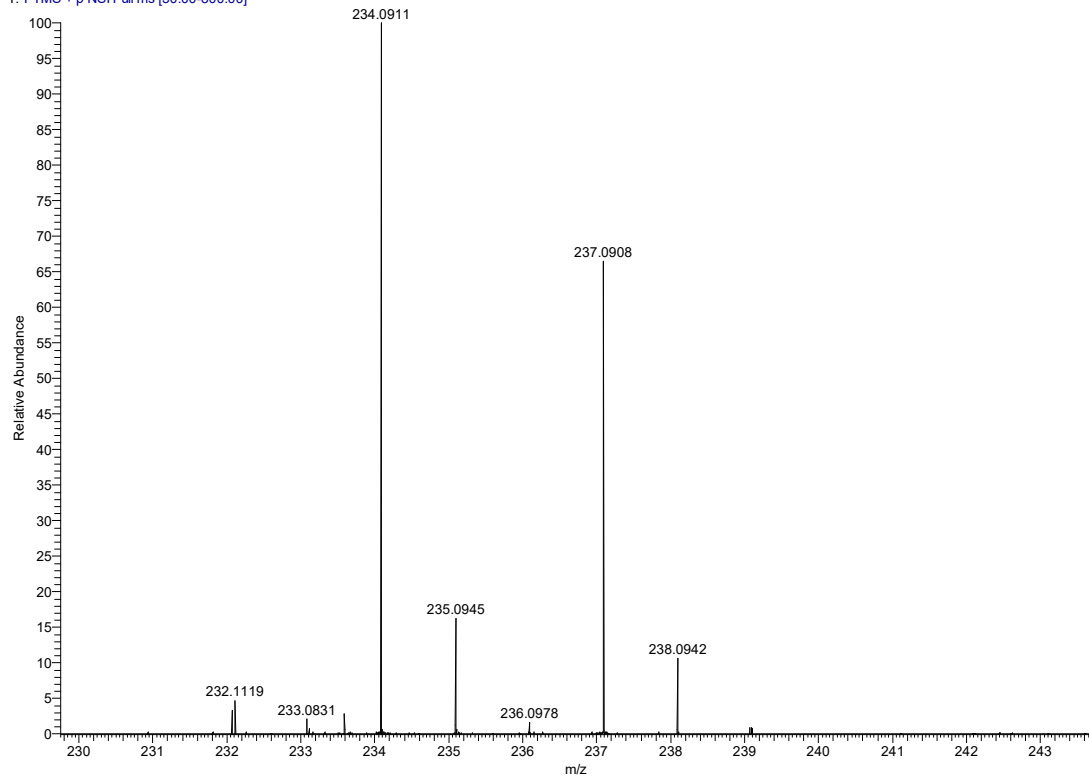

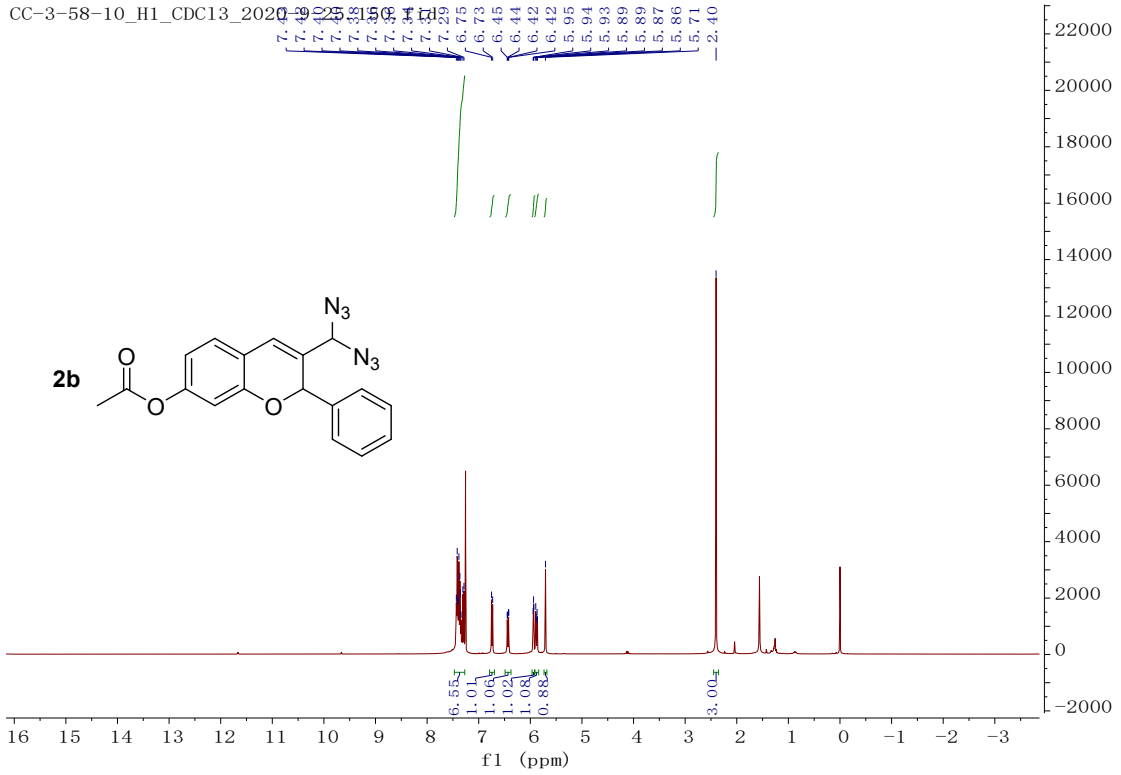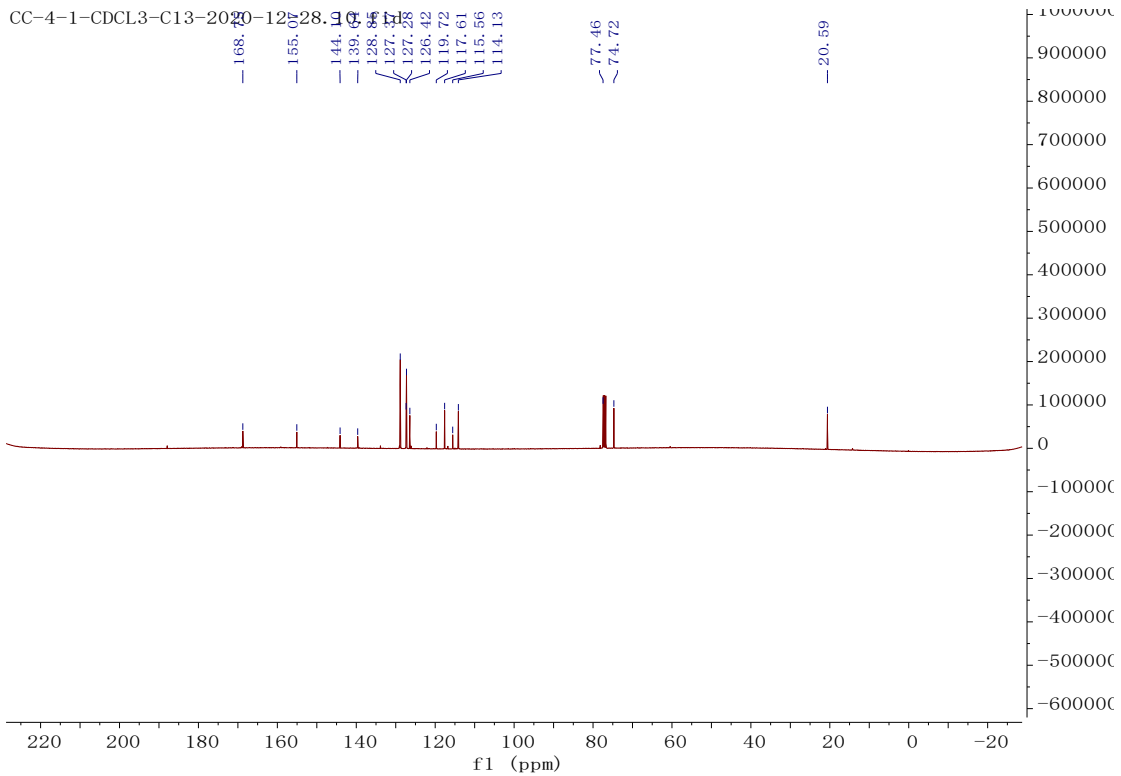

18 #14 RT: 0.2130 AV: 1 NL: 9.01E6  
T: FTMS + p NSI Full ms [50.00-800.00]

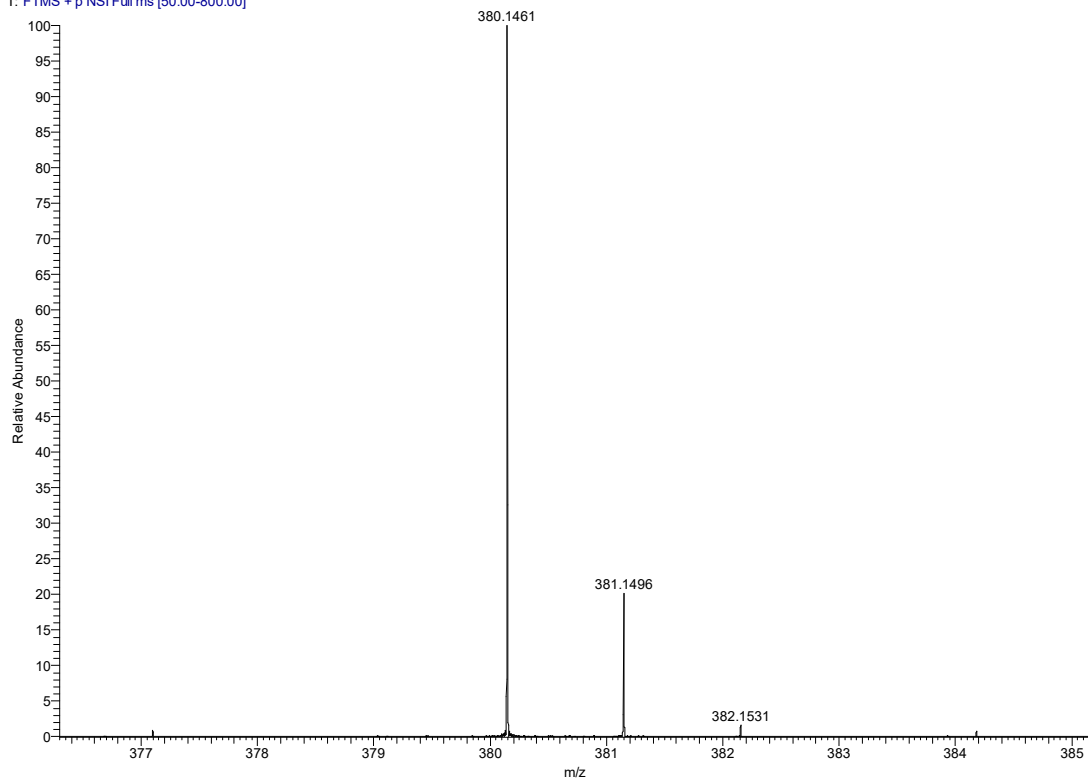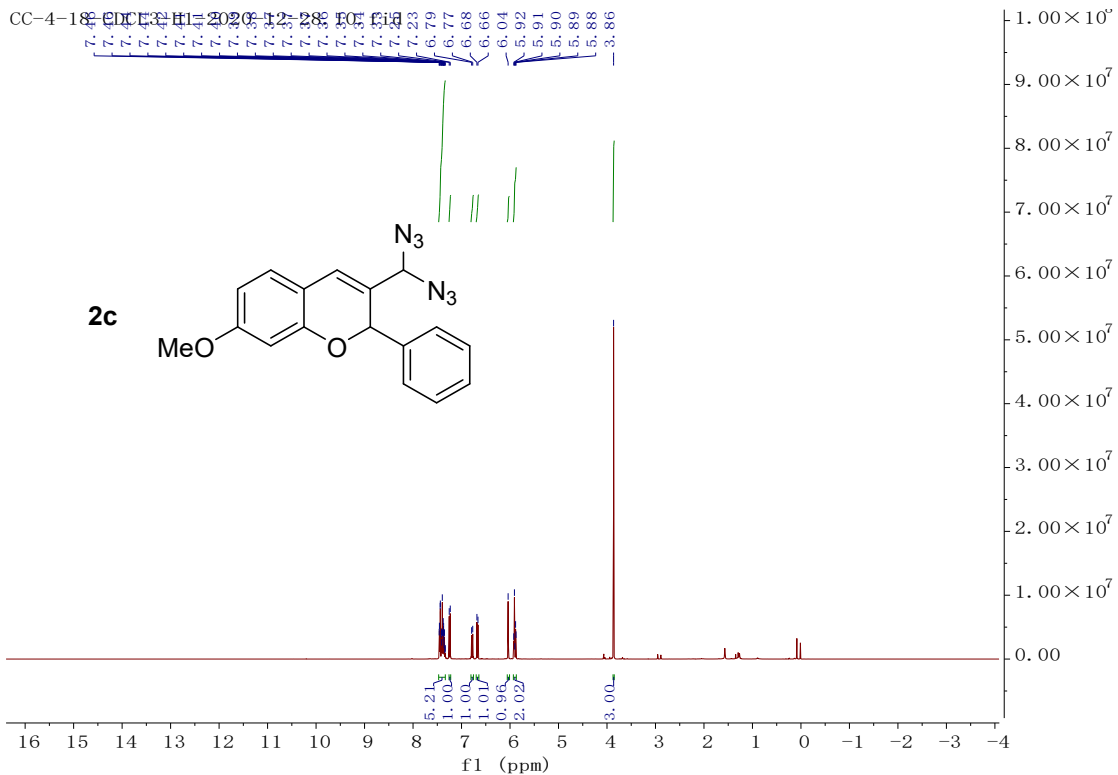

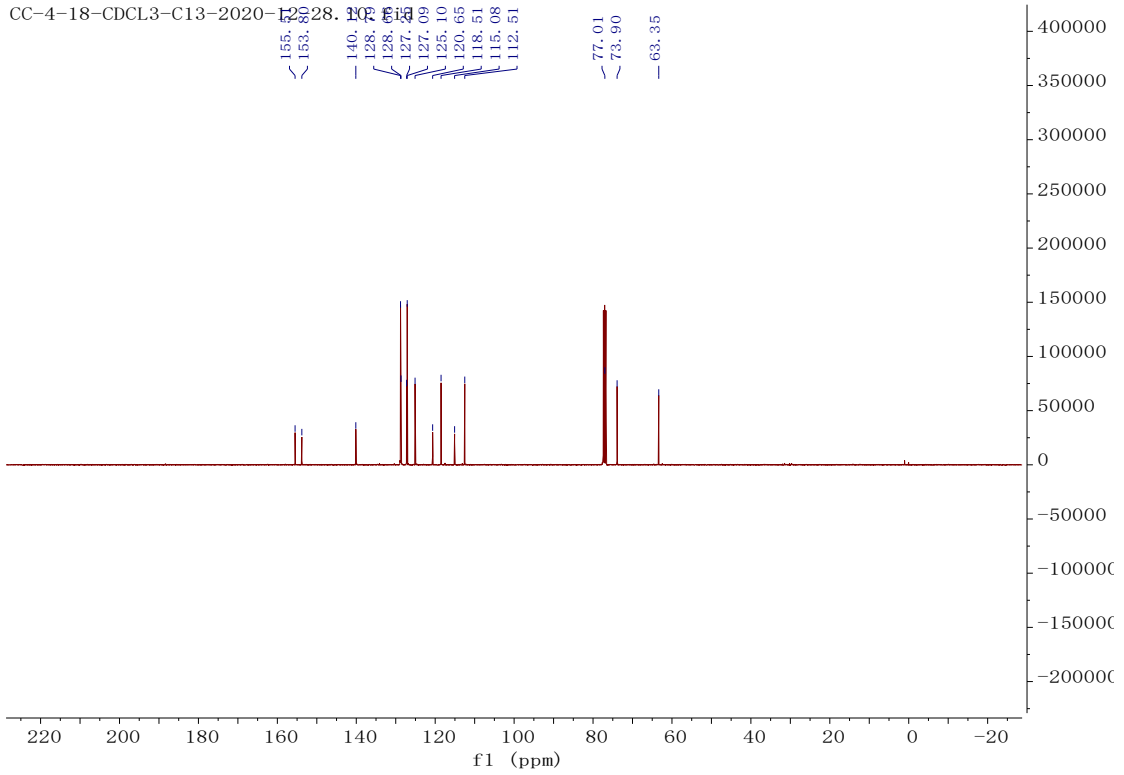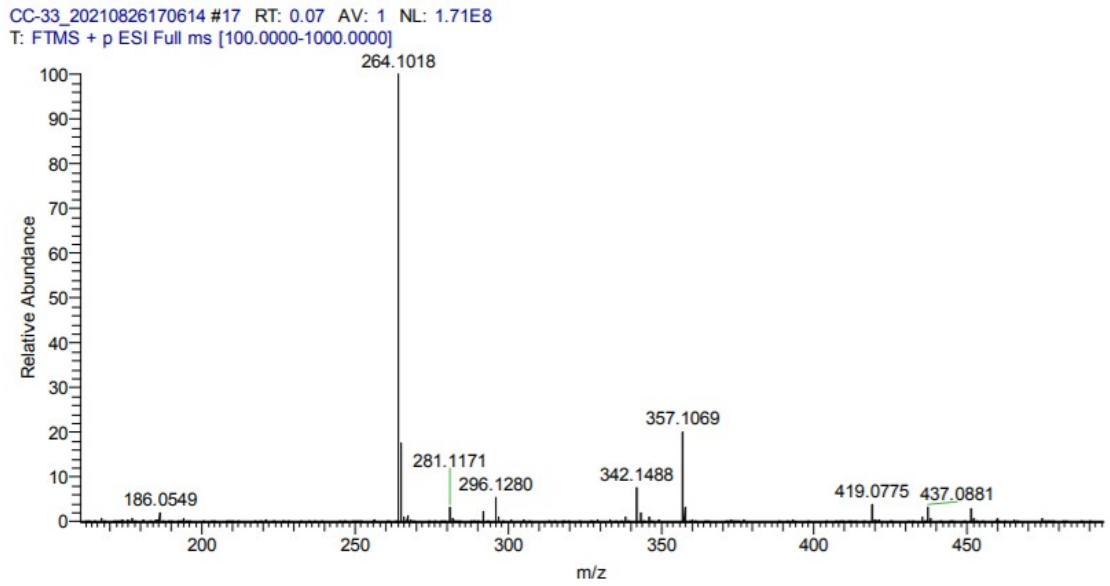

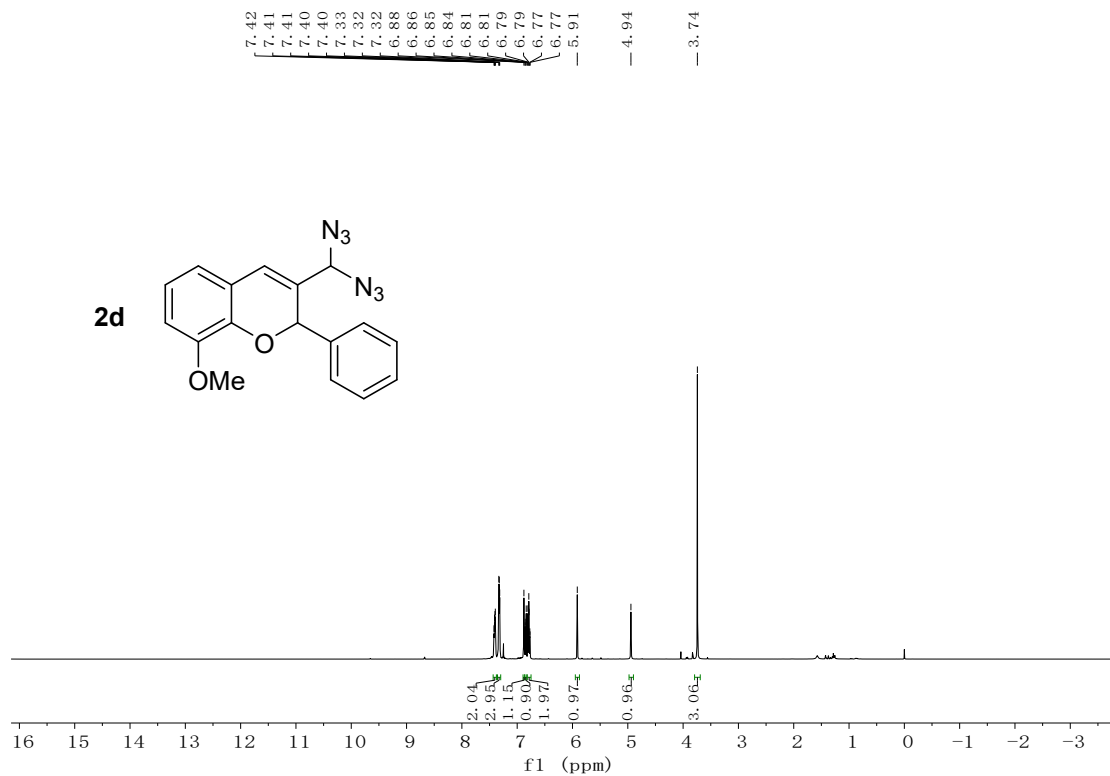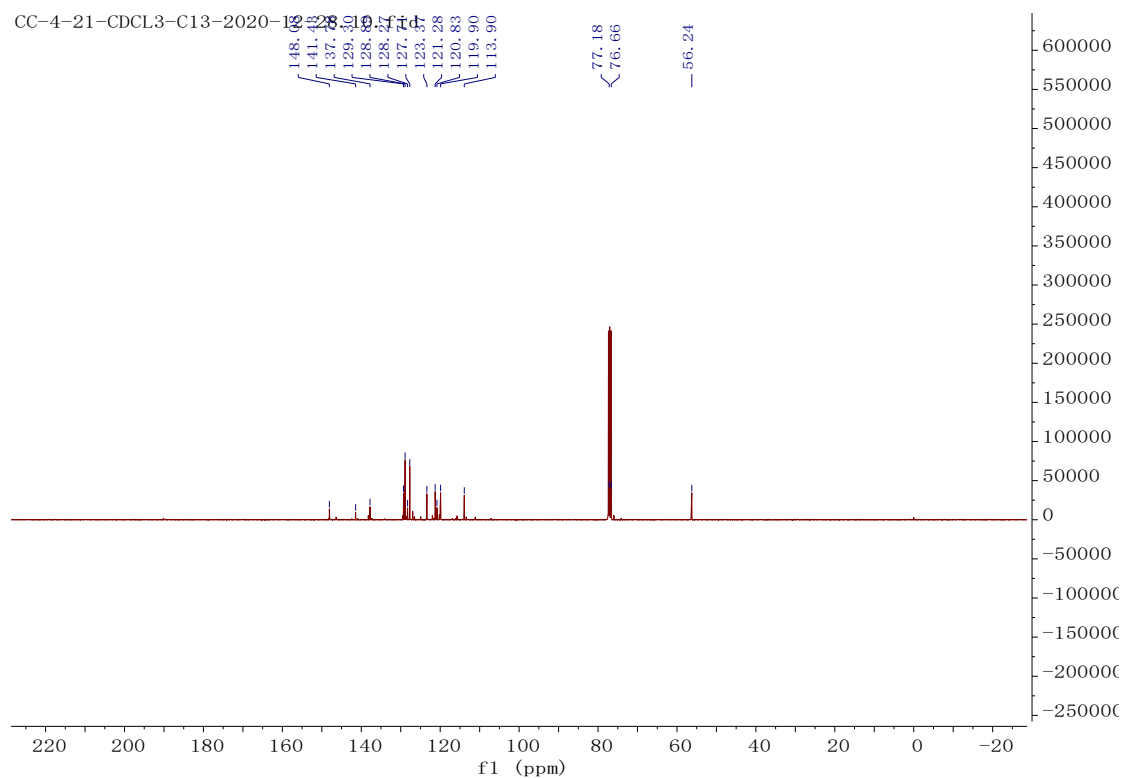

21 #39 RT: 0.6091 AV: 1 NL: 1.26E5  
T: FTMS + p NSI Full ms [50.00-800.00]

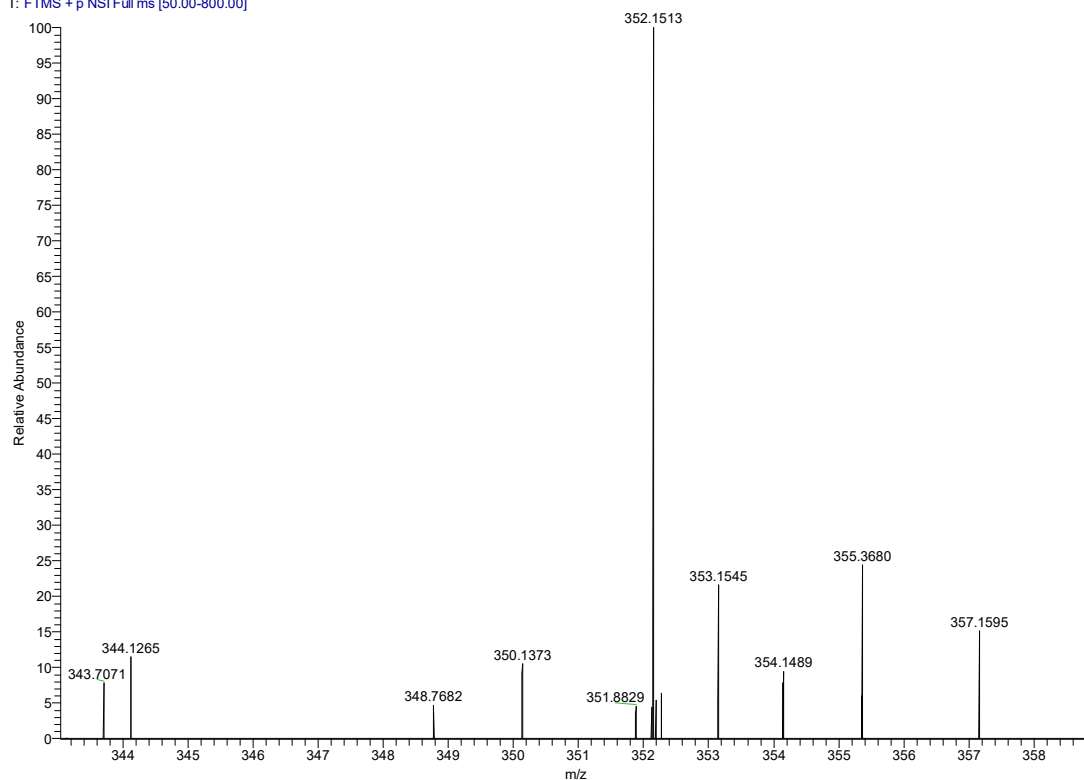

7.23  
7.23  
7.22  
7.21  
7.21  
7.20  
7.19  
7.18  
7.17  
6.95  
6.94  
6.94  
6.93  
6.92  
6.91  
6.84  
6.82  
6.77  
6.77  
6.76  
6.08  
6.06  
4.73  
4.73  
4.72

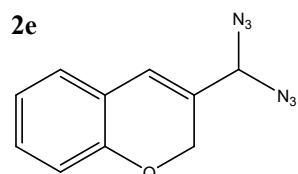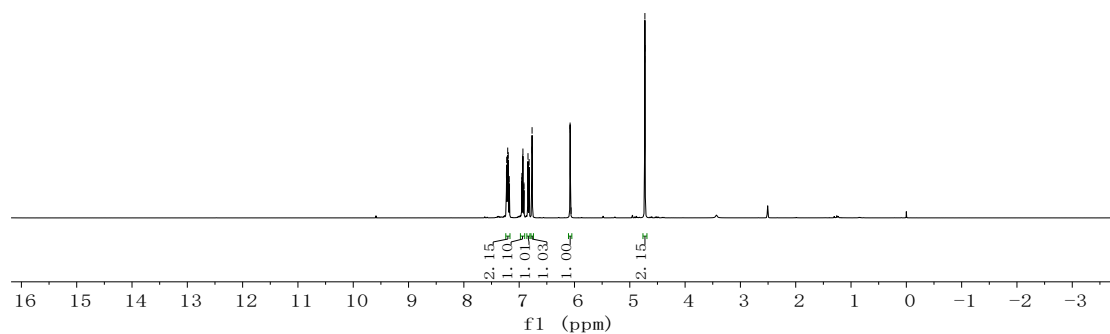

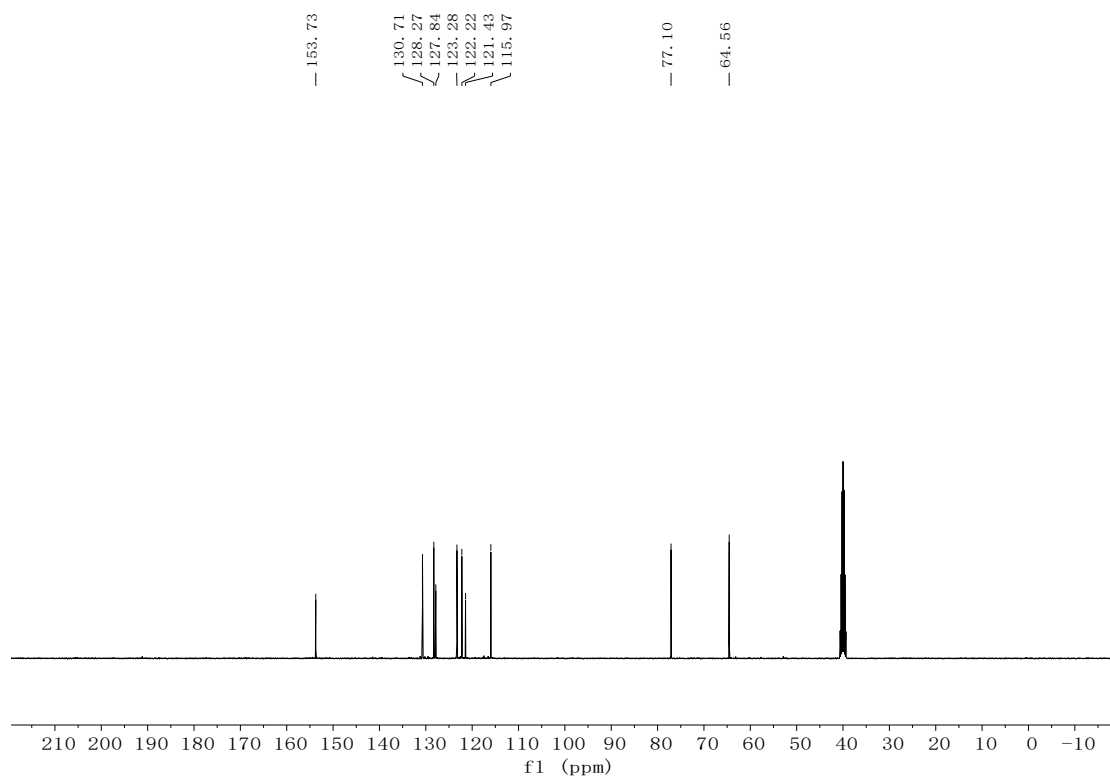

CC-8-14\_20220218175121 #10 RT: 0.08 AV: 1 NL: 4.40E7  
 T: FTMS + p ESI Full ms [120.0000-1800.0000]

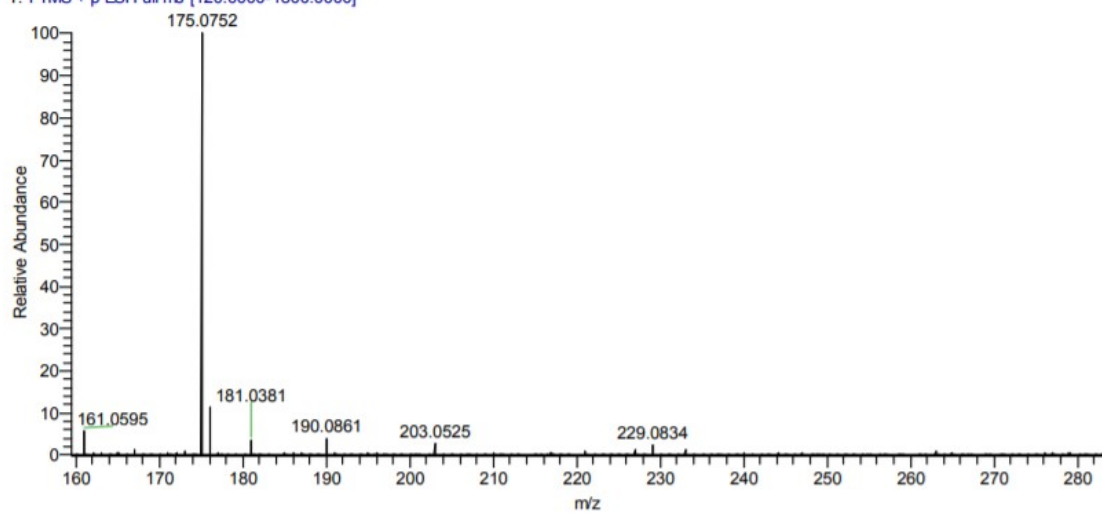

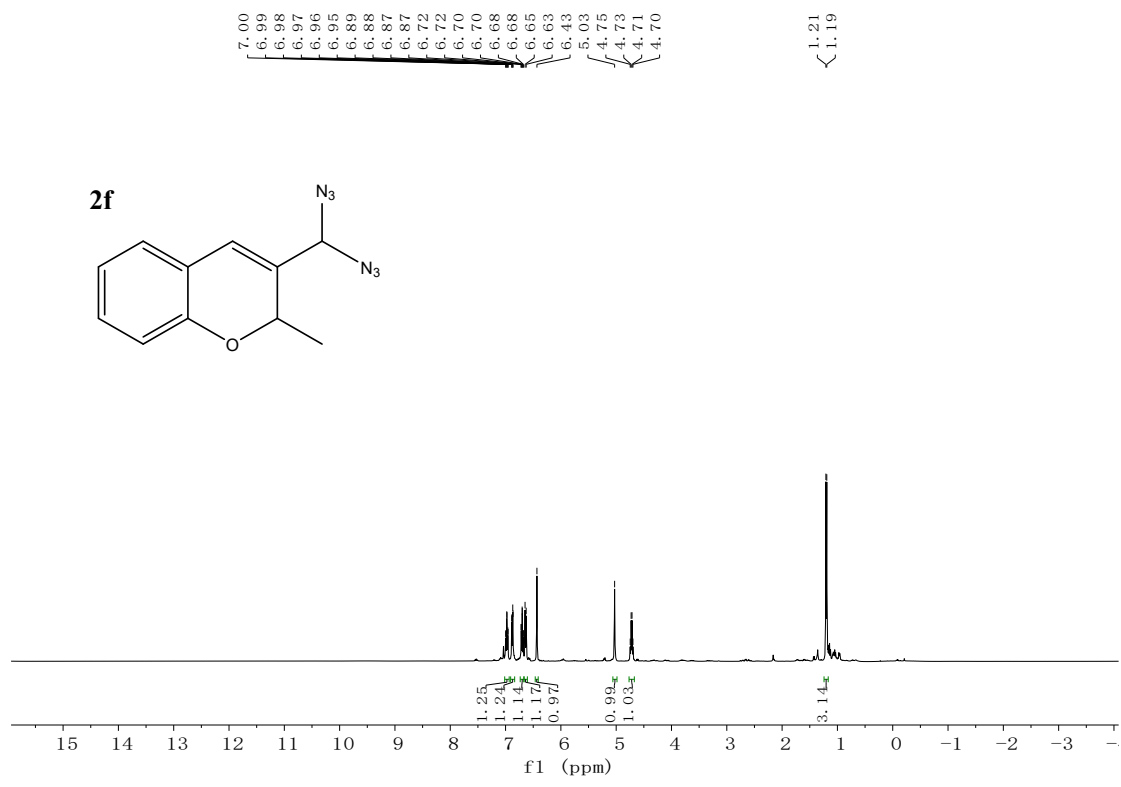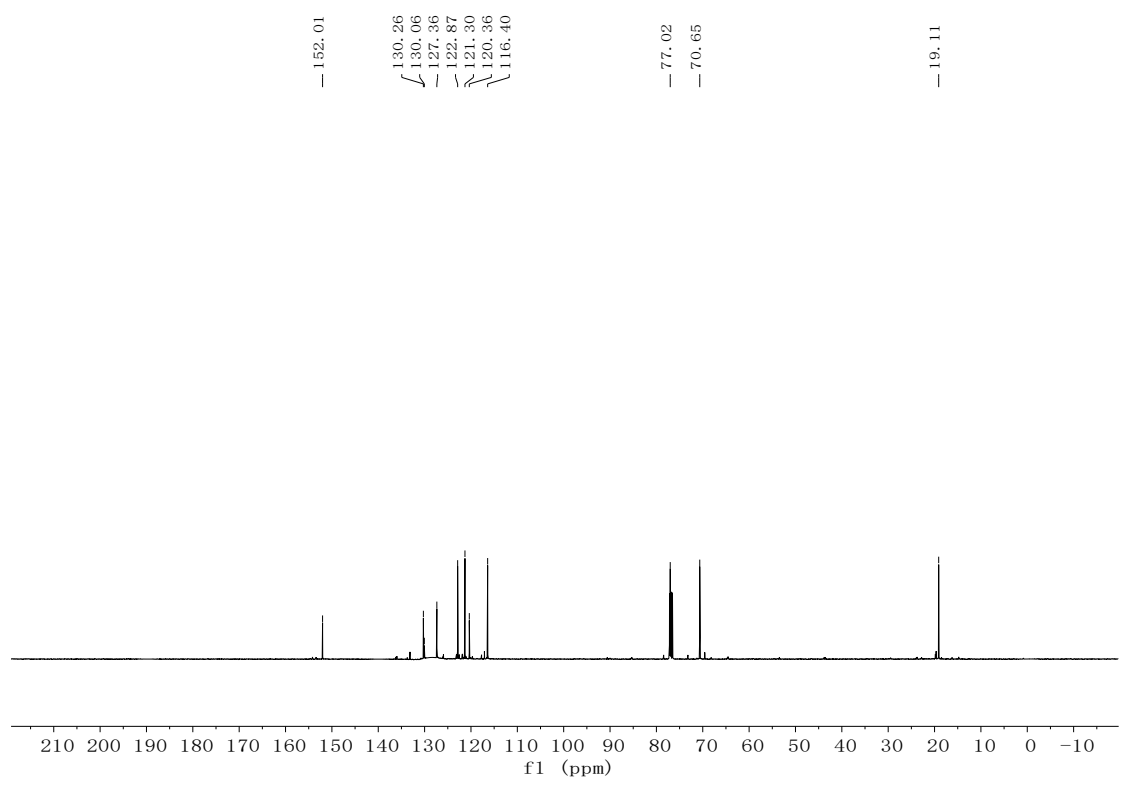



CC-8-15\_20220218175327 #10 RT: 0.08 AV: 1 NL: 1.62EB  
T: FTMS + p ESI Full ms [120.0000-1800.0000]

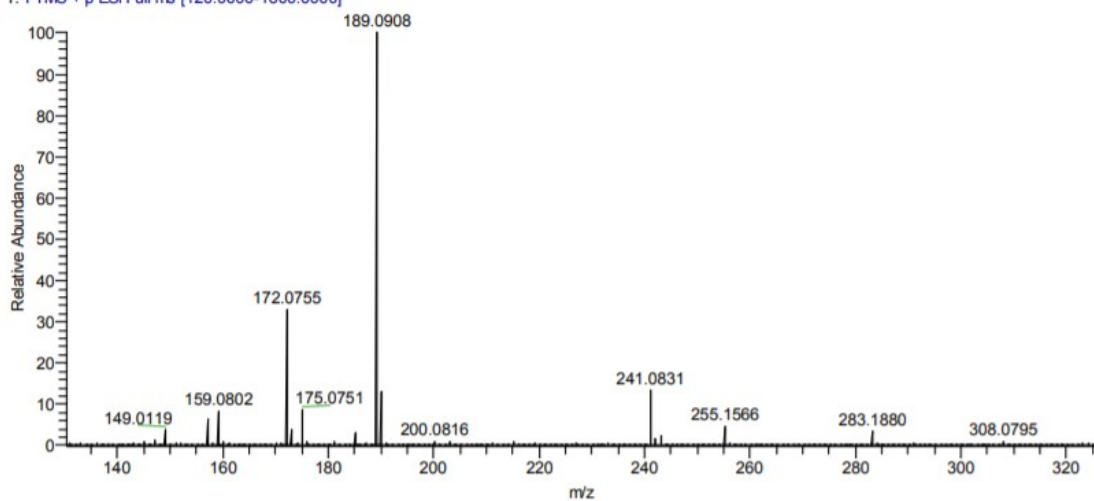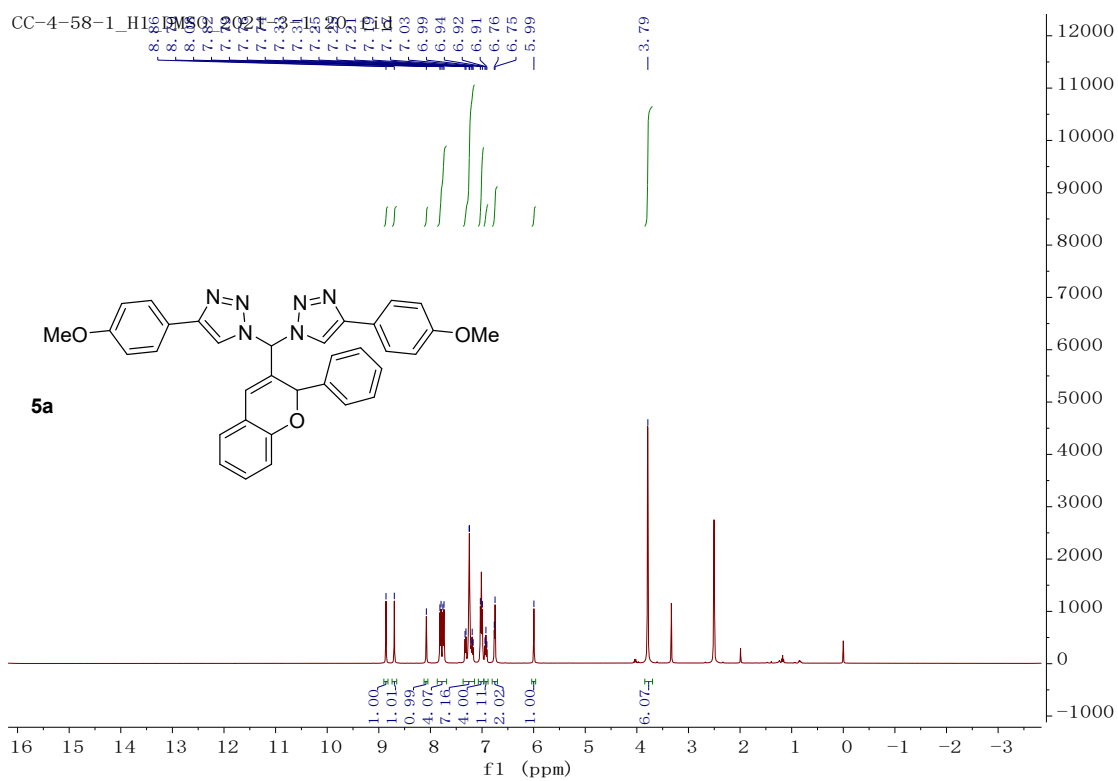

CC-4-58-1-DMSO-C13-2021

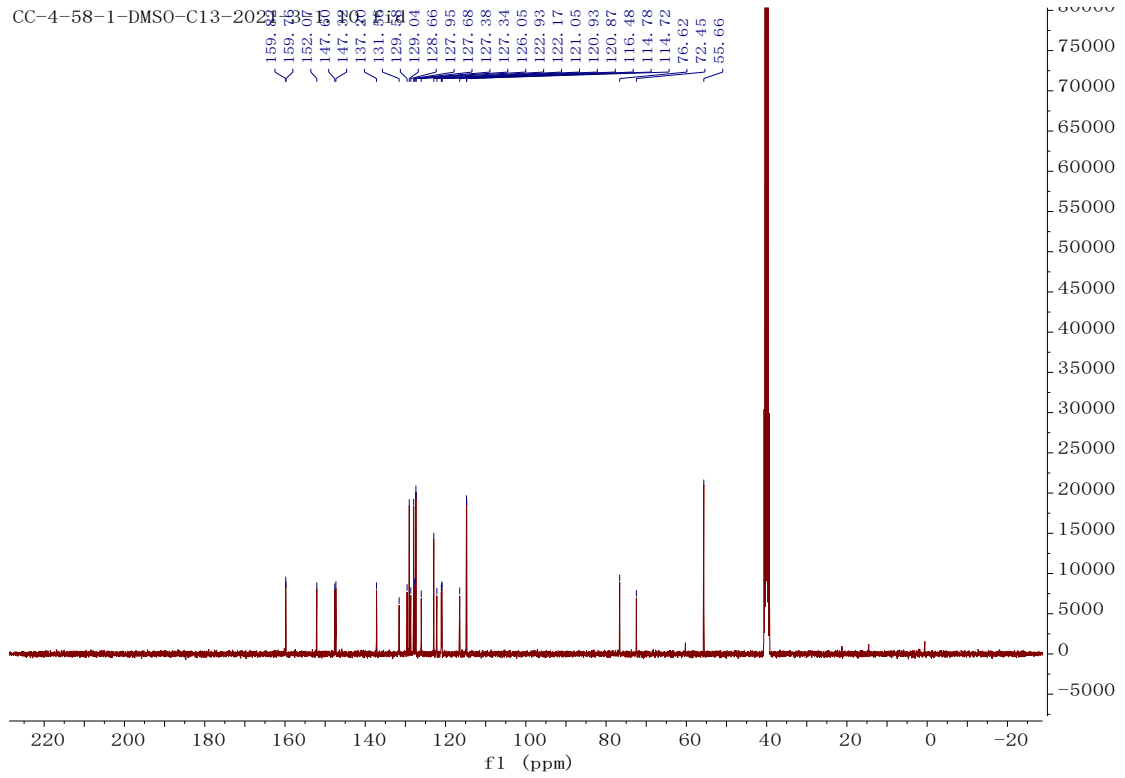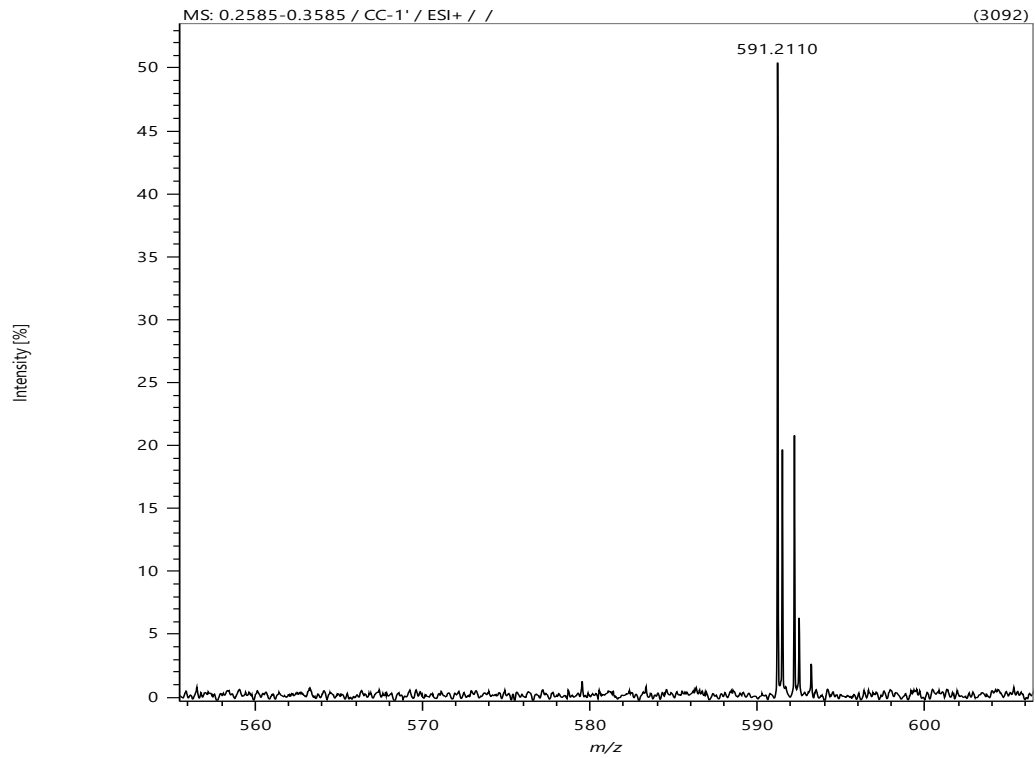

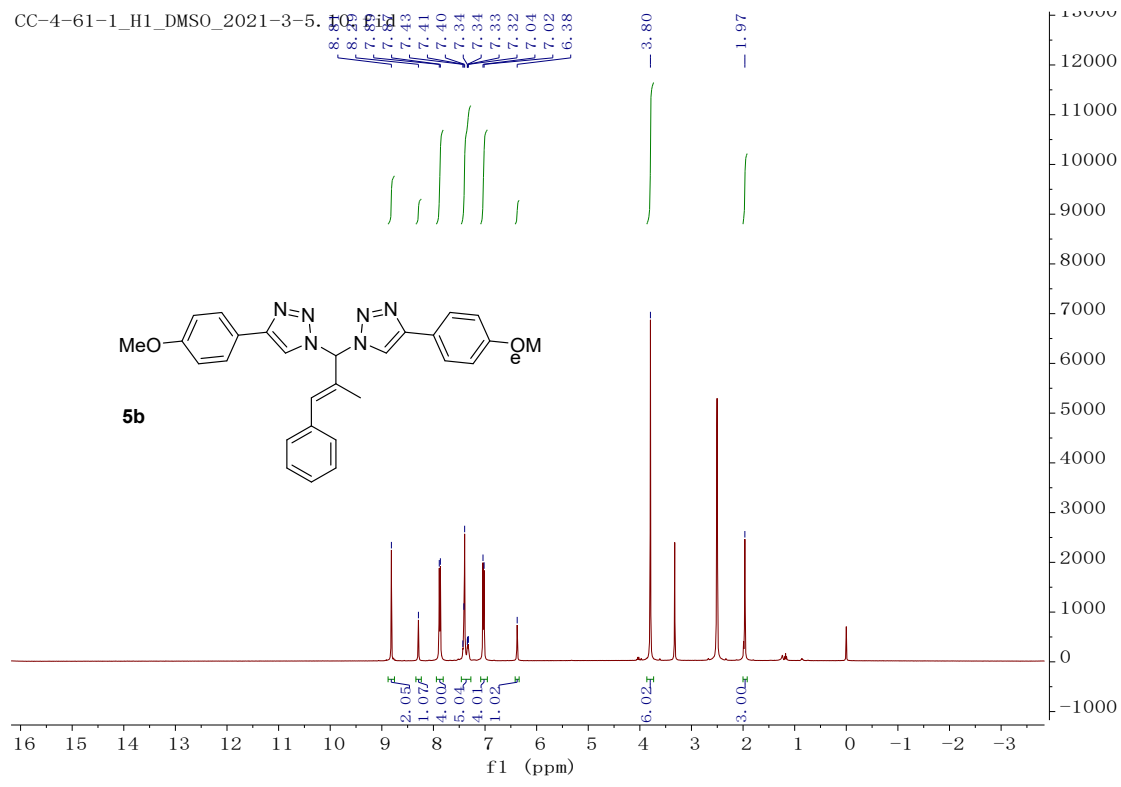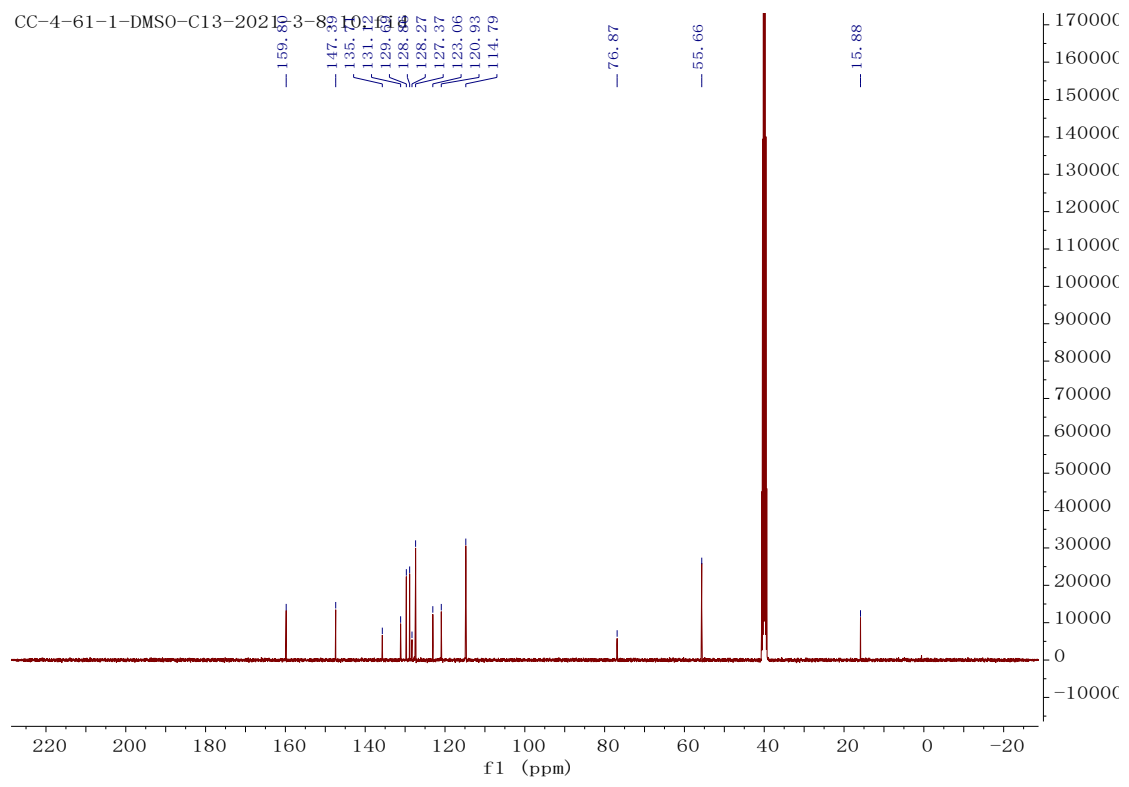

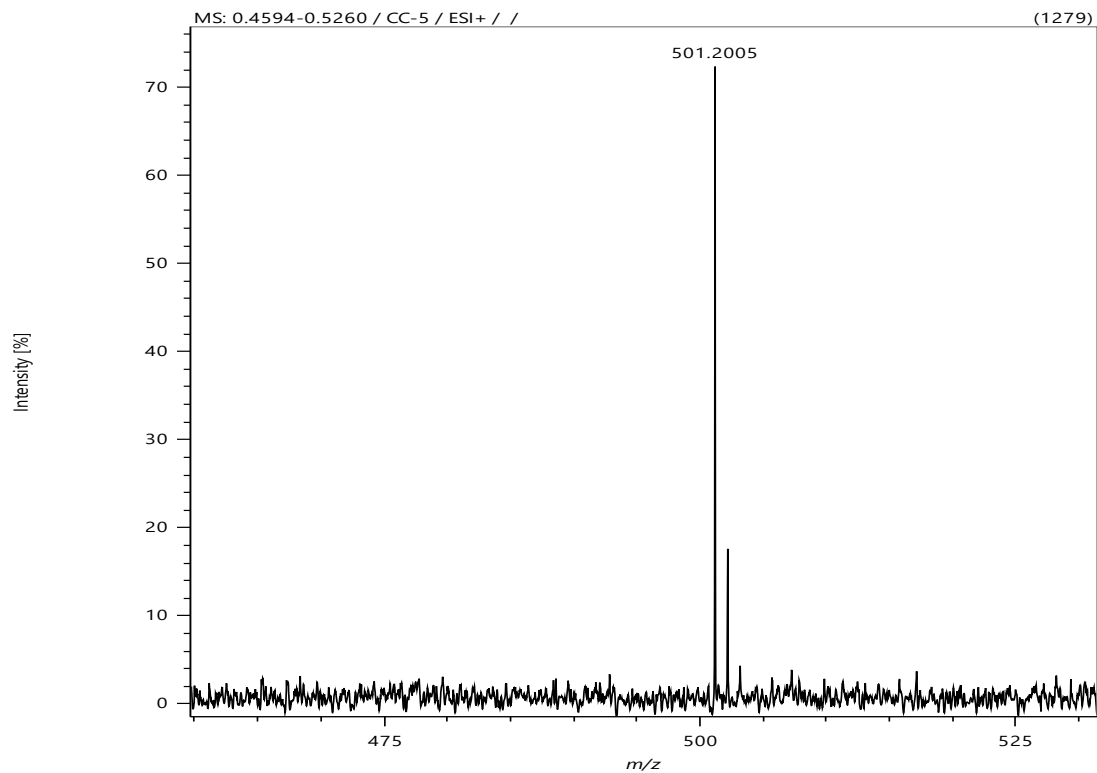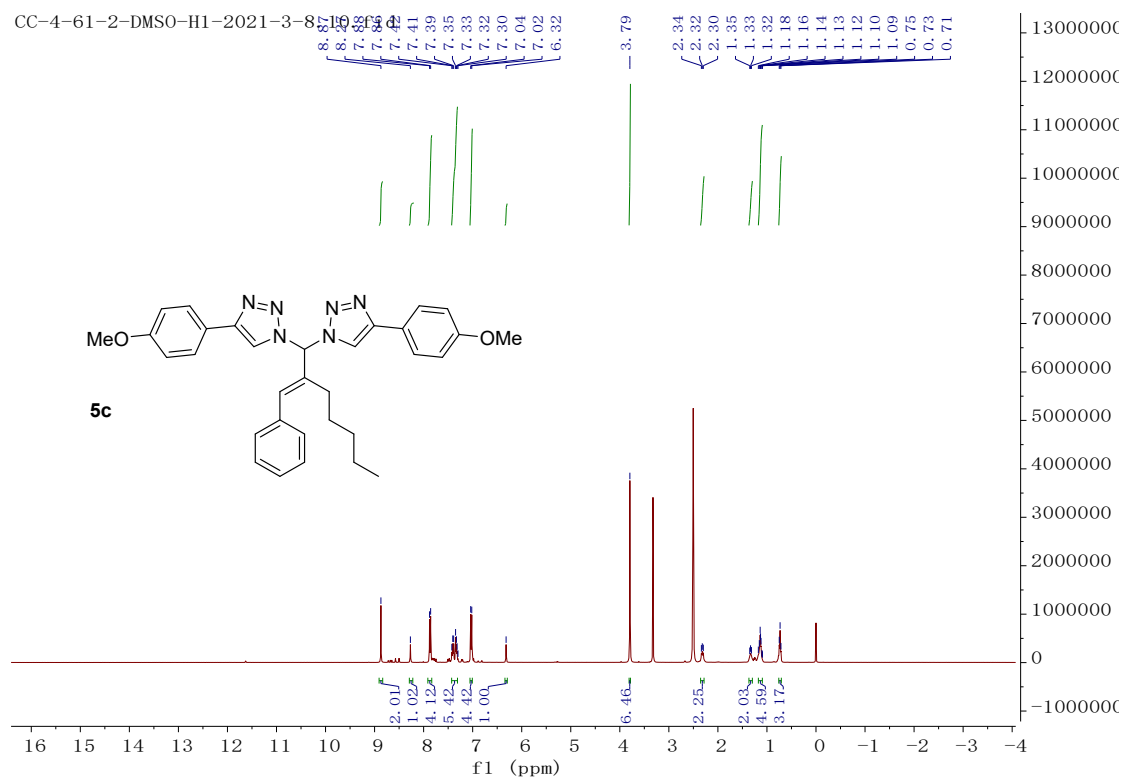

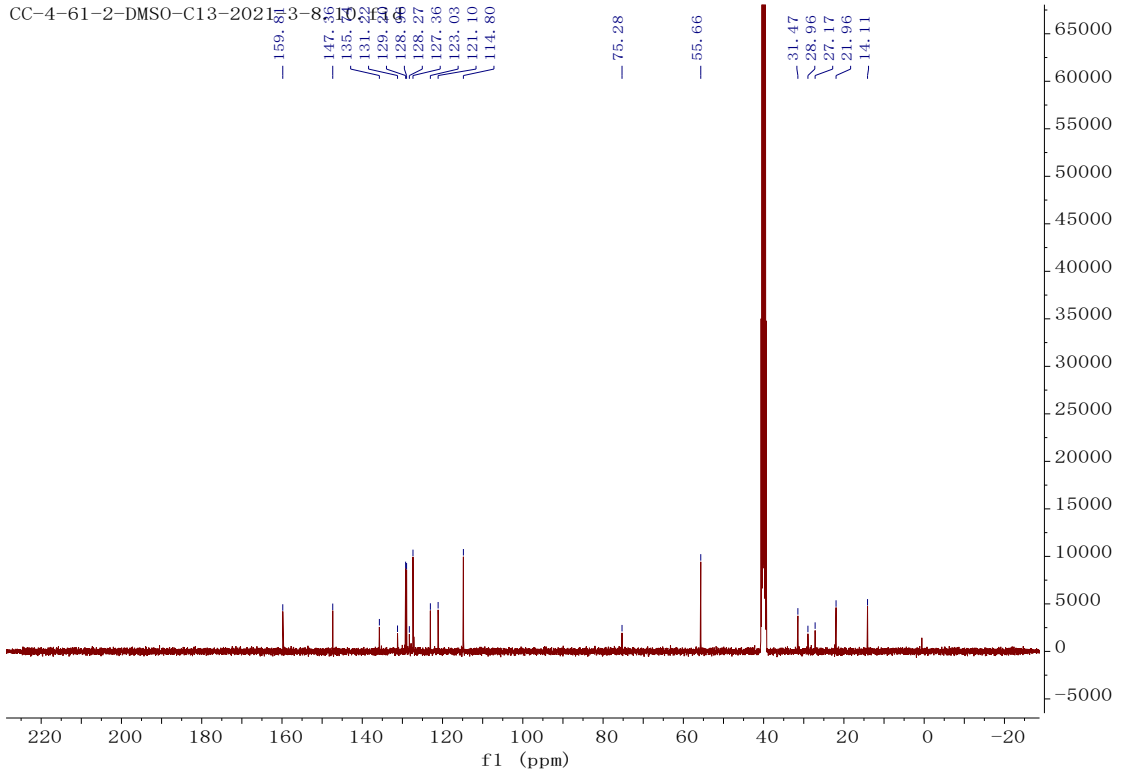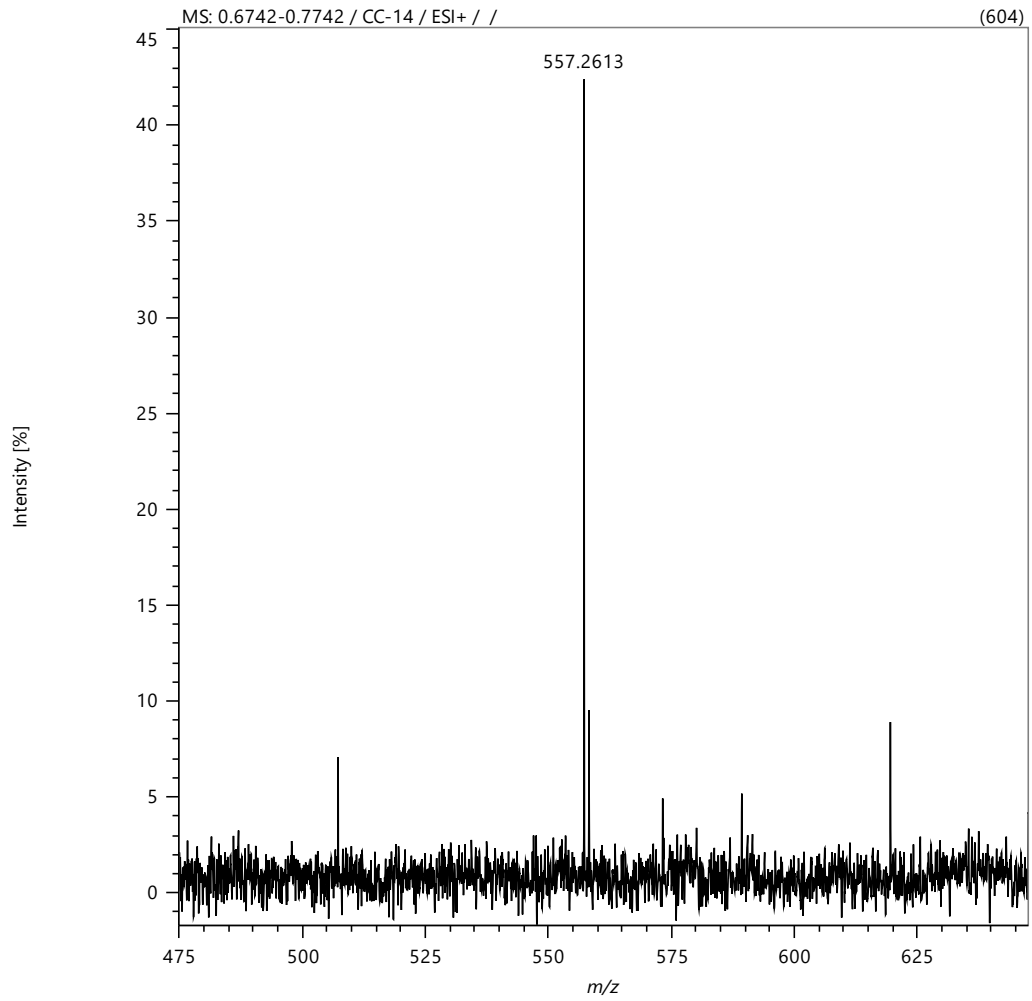

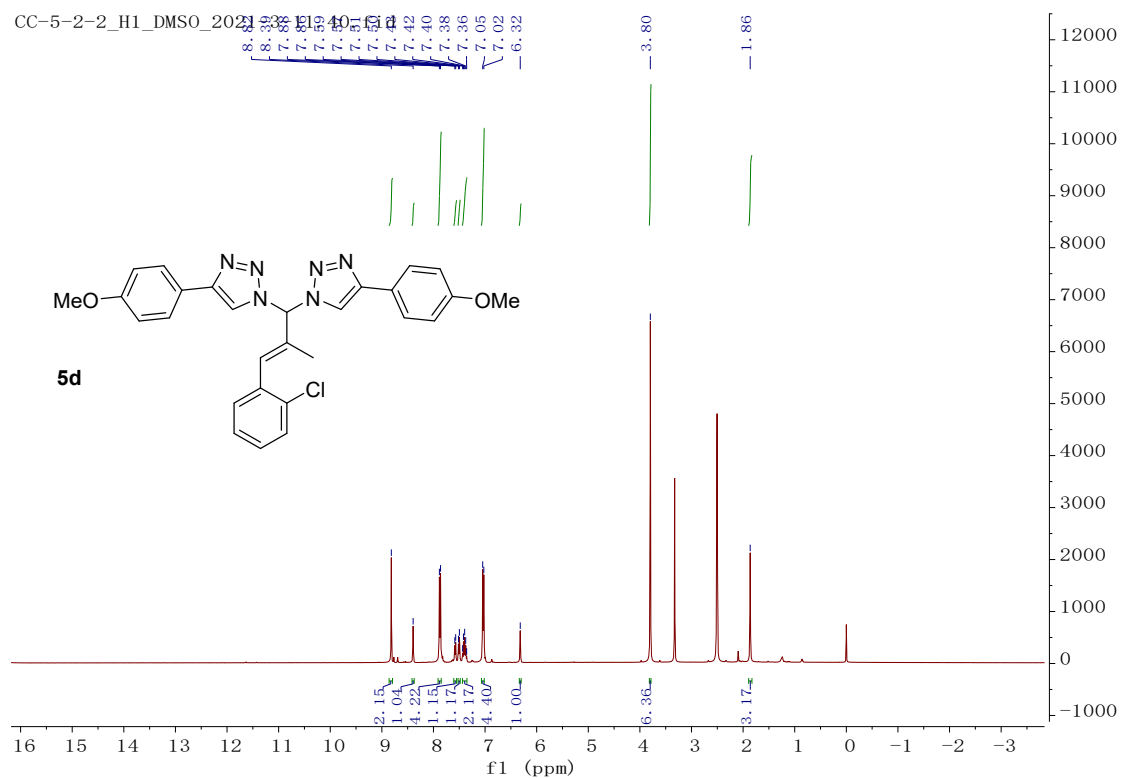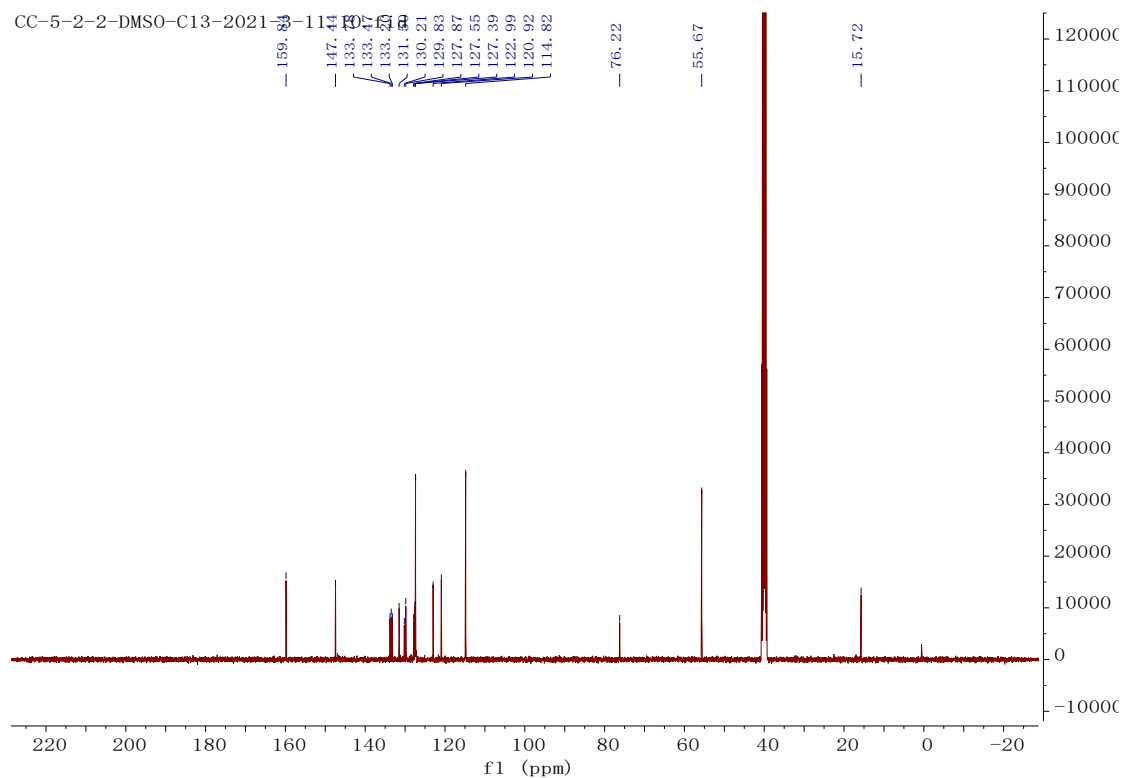

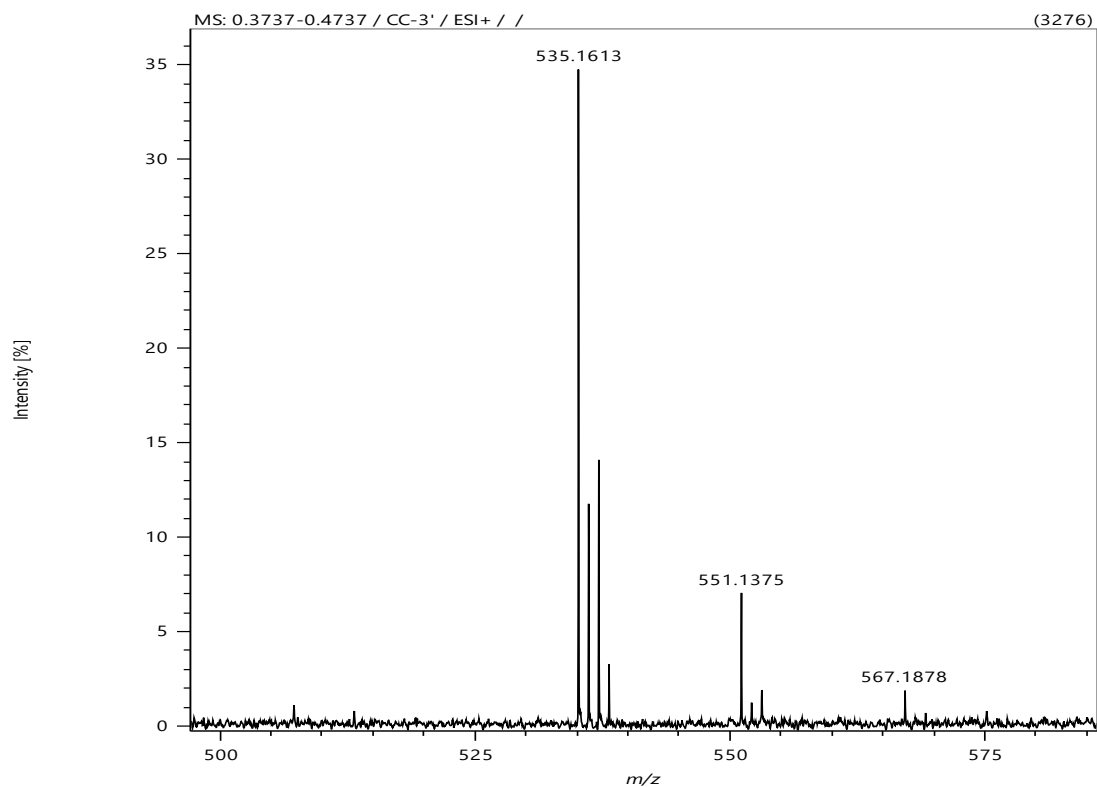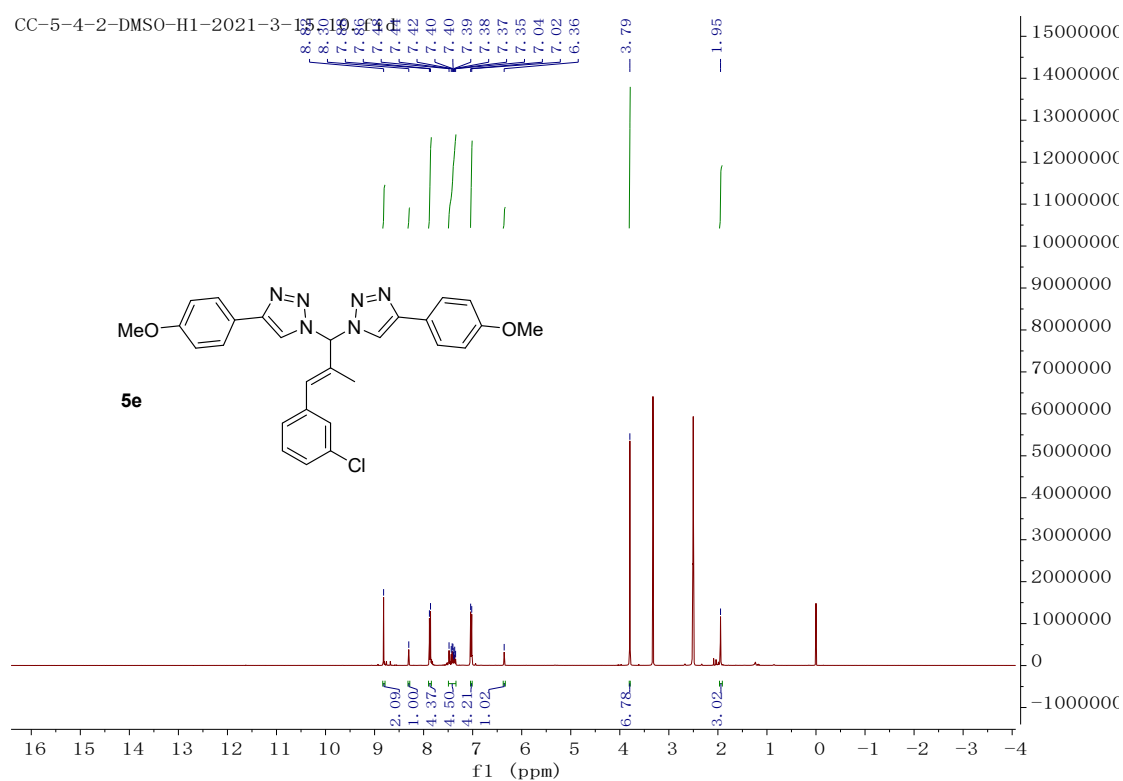

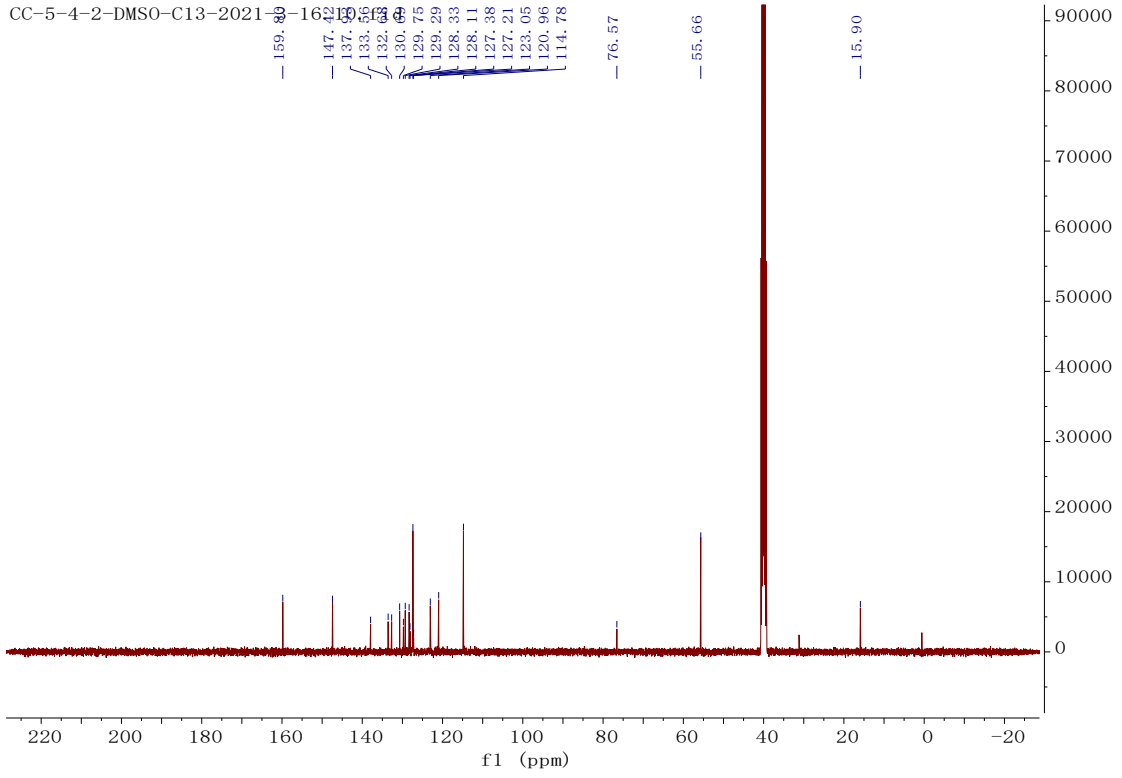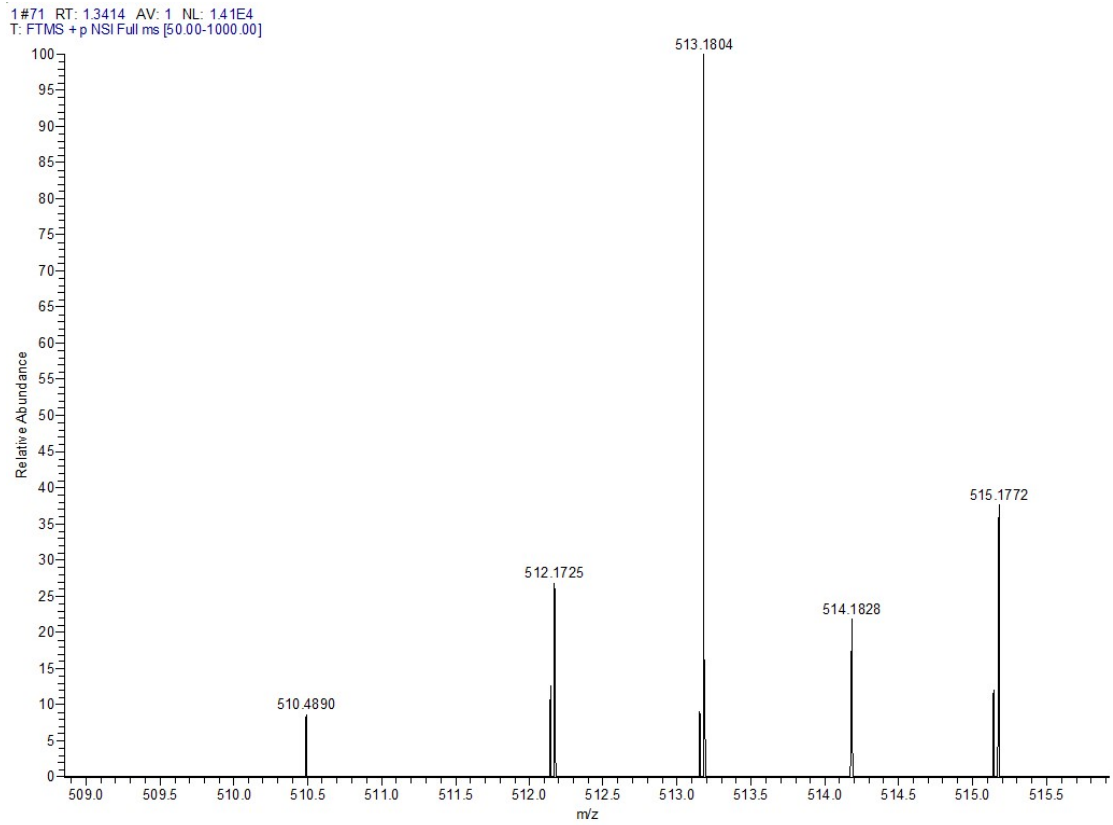



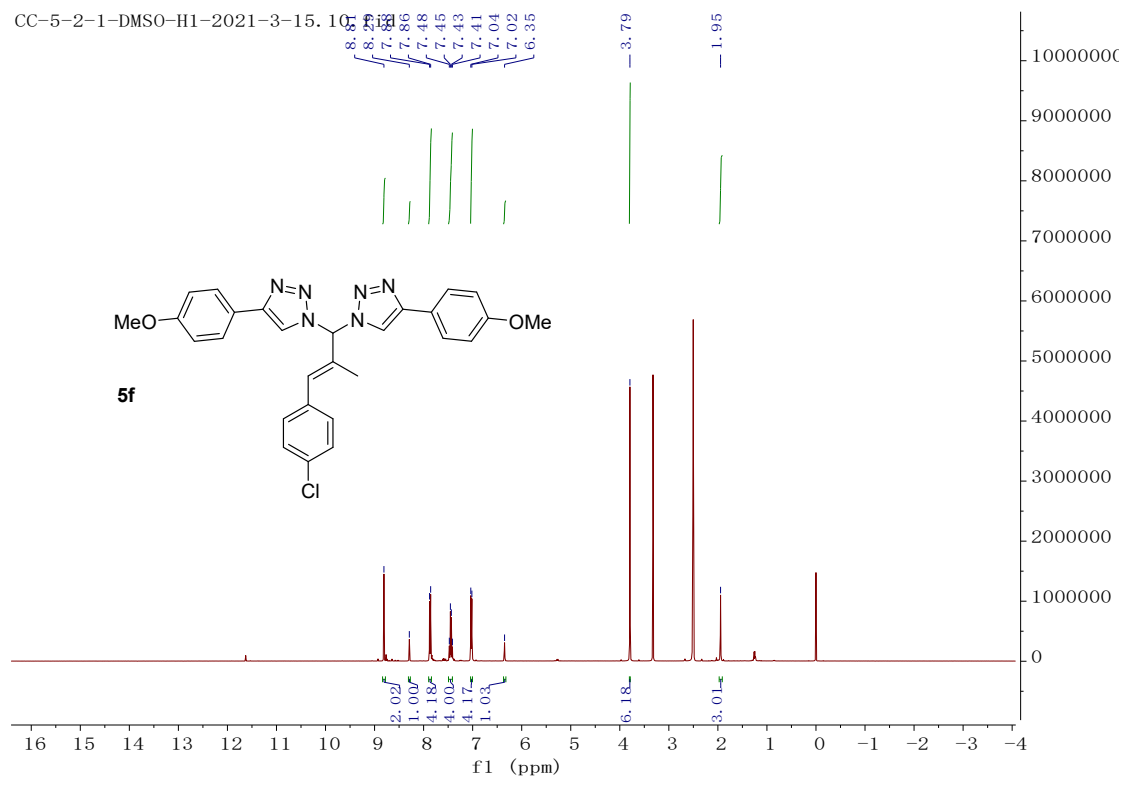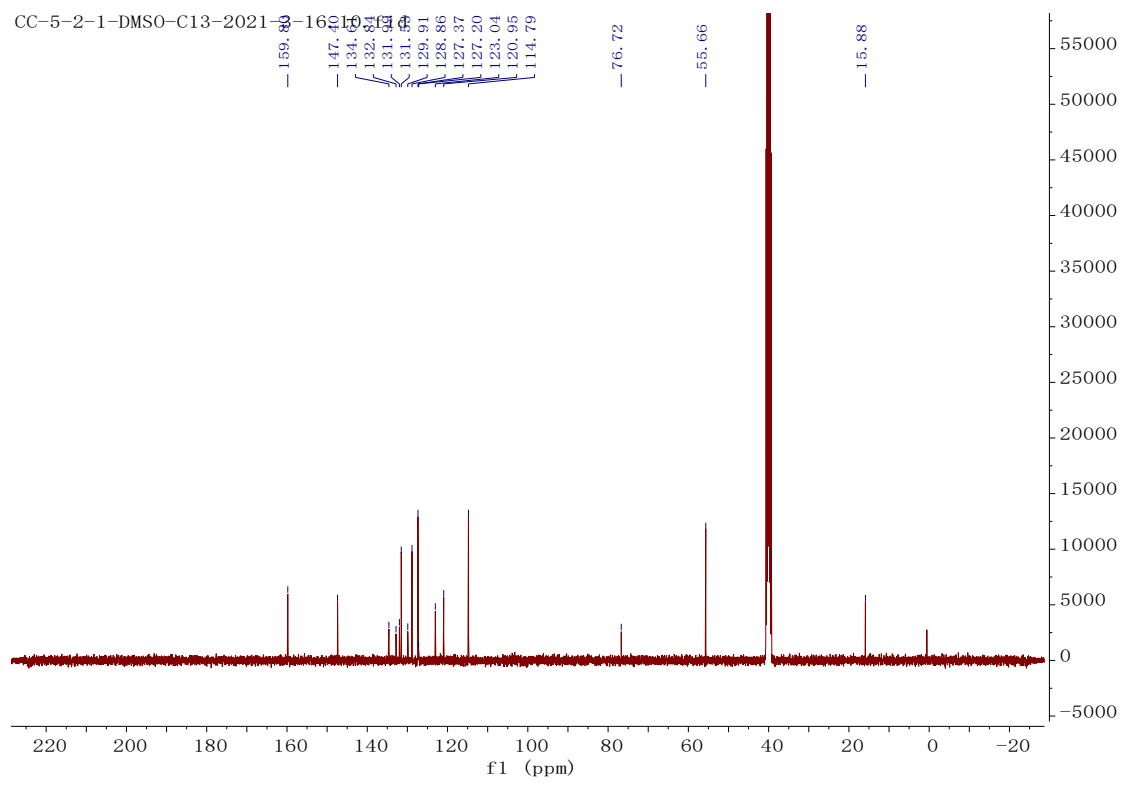

2#12 RT: 0.2049 AV: 1 NL: 1.62E4  
T: FTMS + p NSI Full ms [50.00-1000.00]

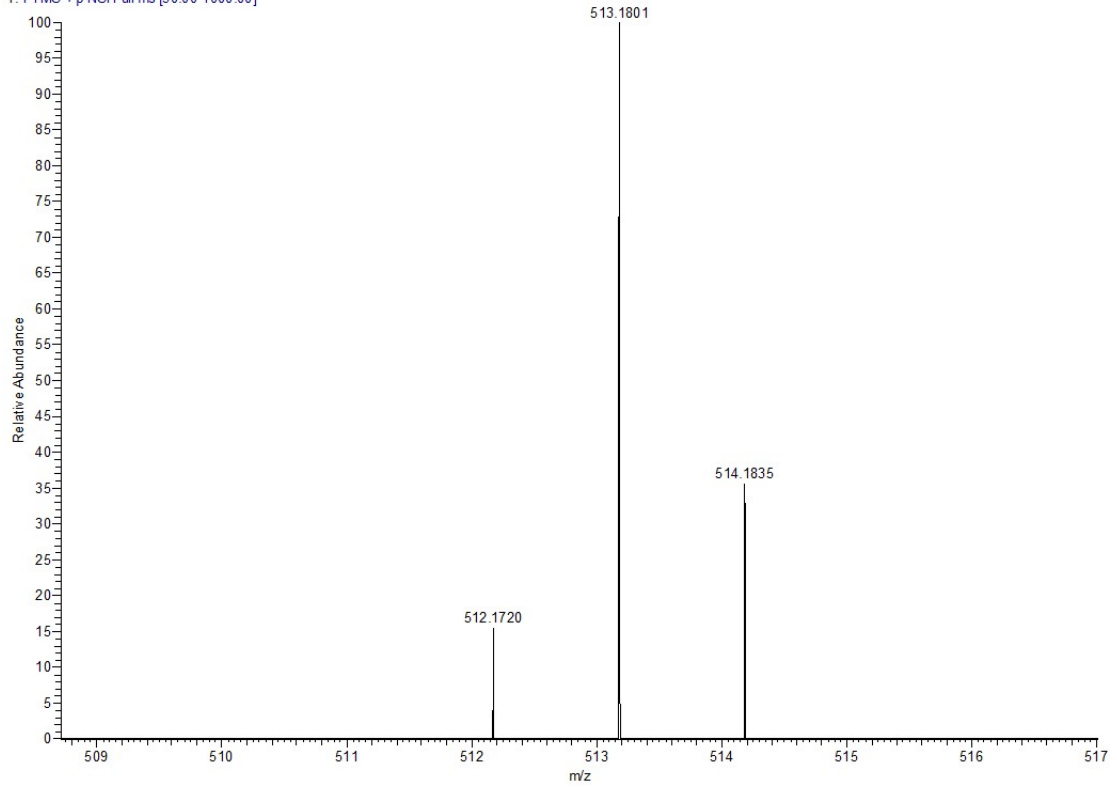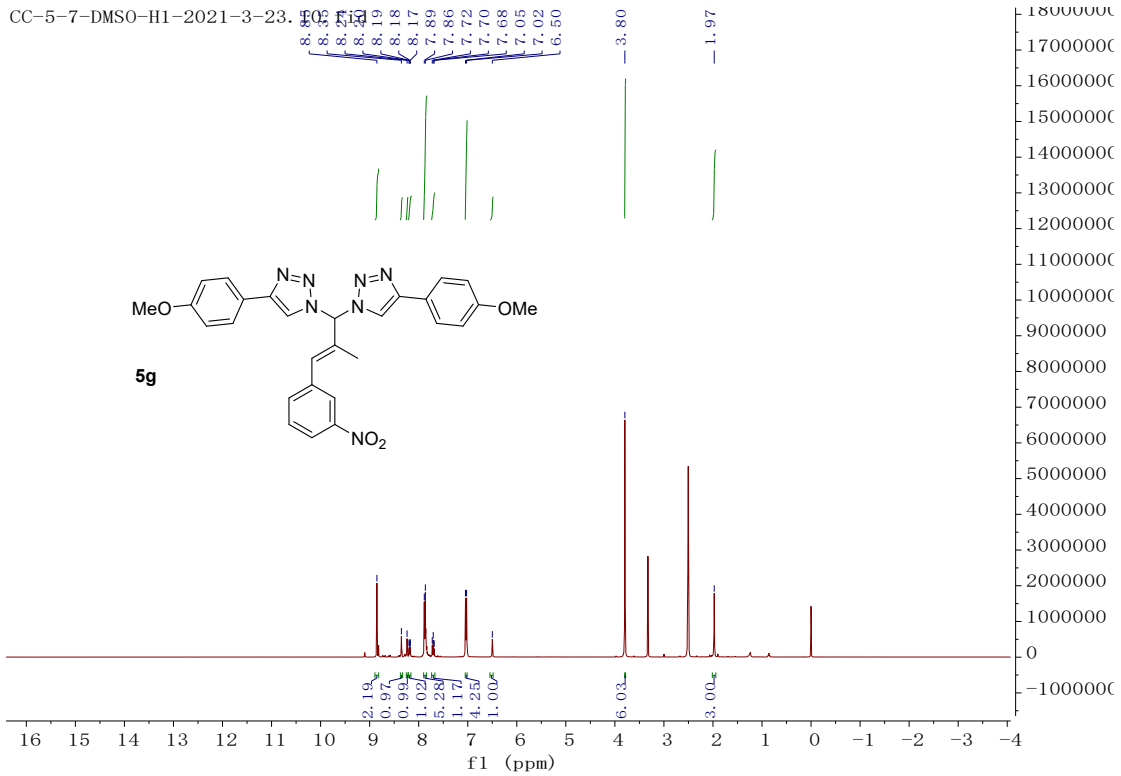

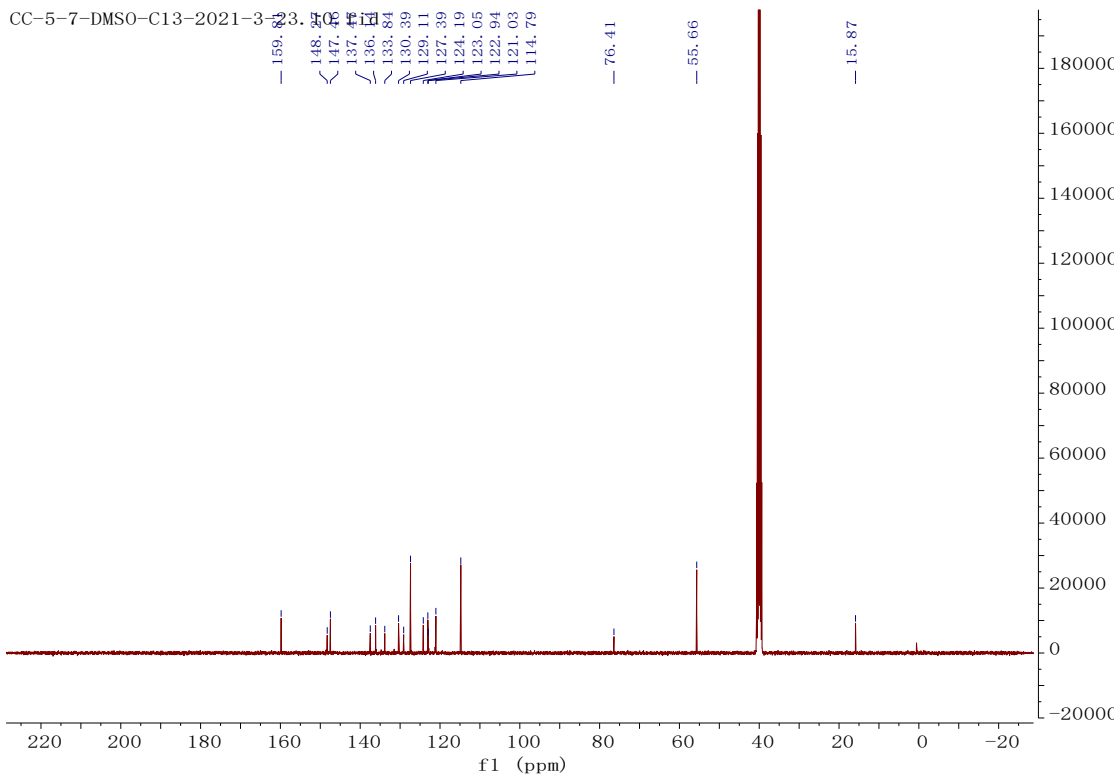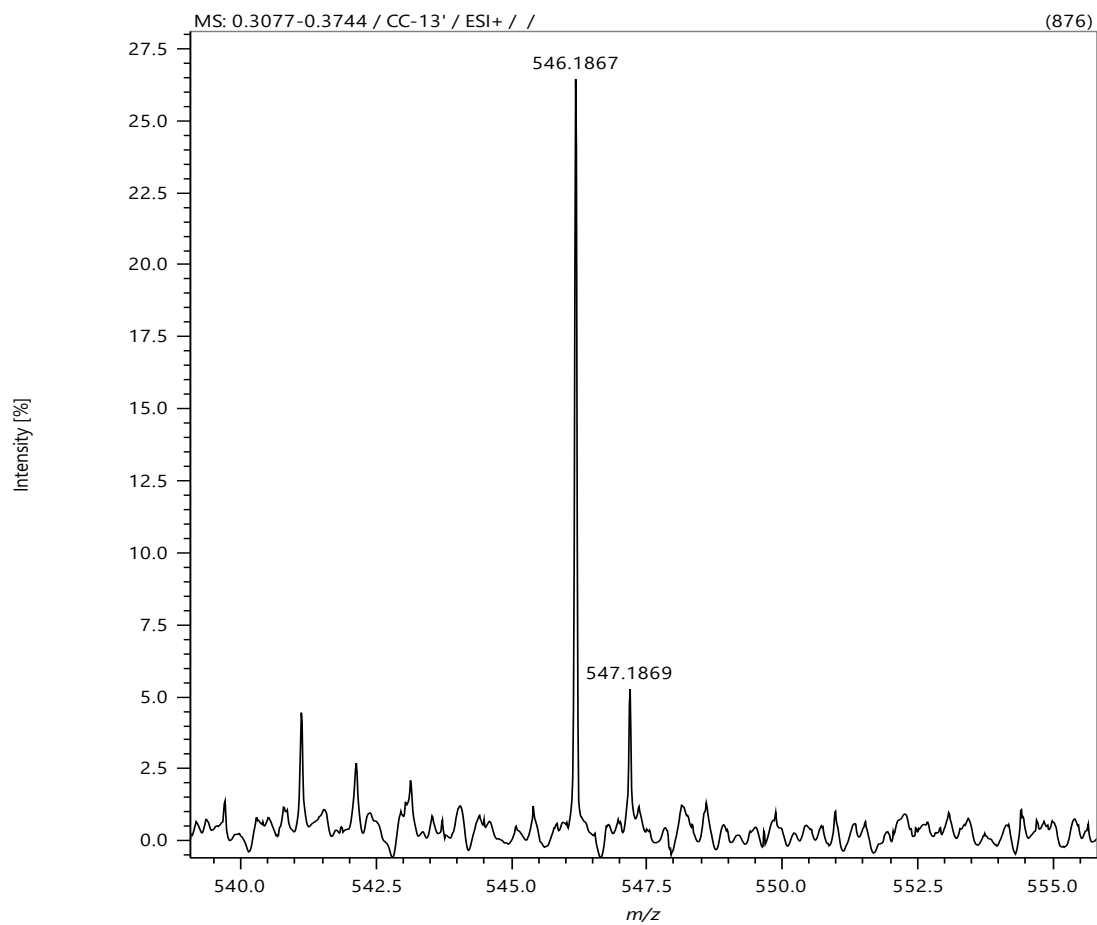

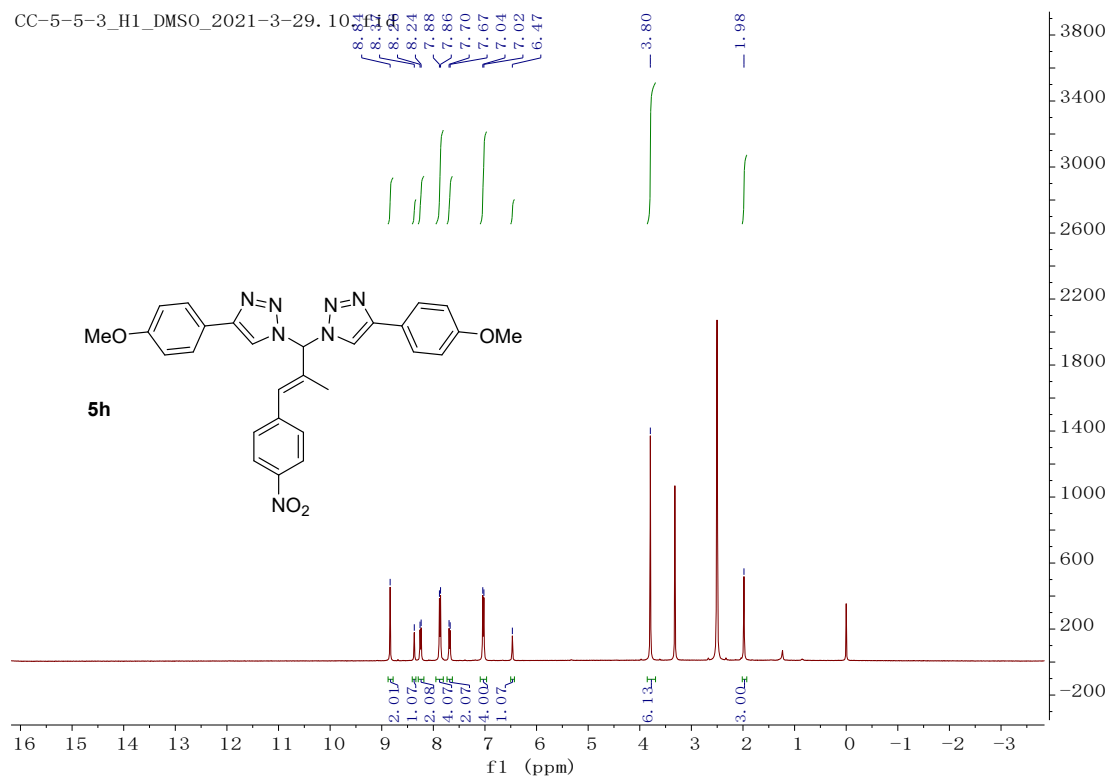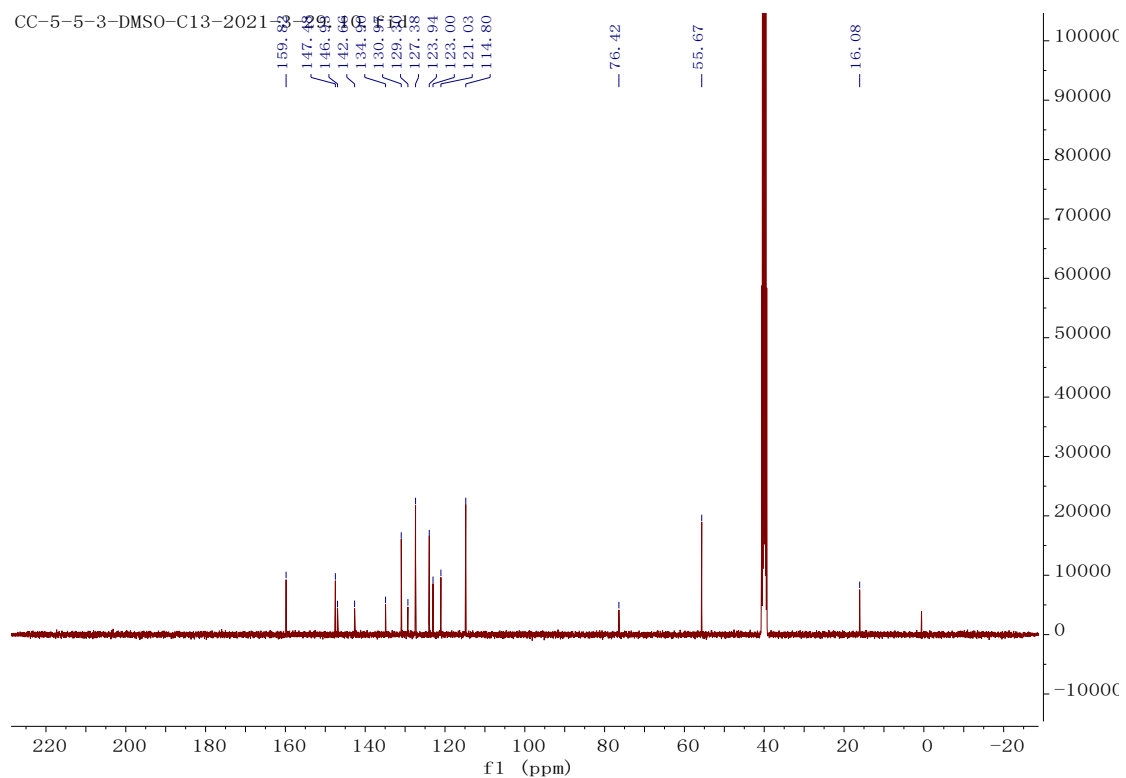

2#12 RT: 0.2049 AV: 1 NL: 1.62E4  
 T: FTMS + p NSI Full ms [50.00-1000.00]

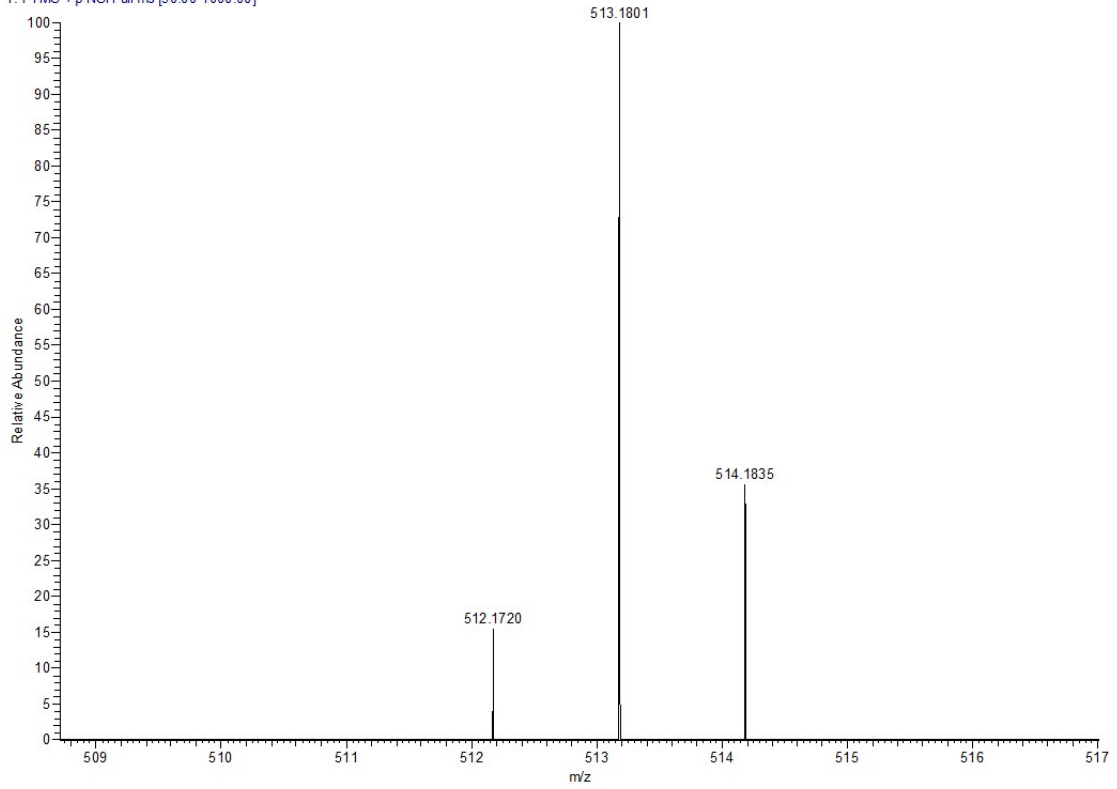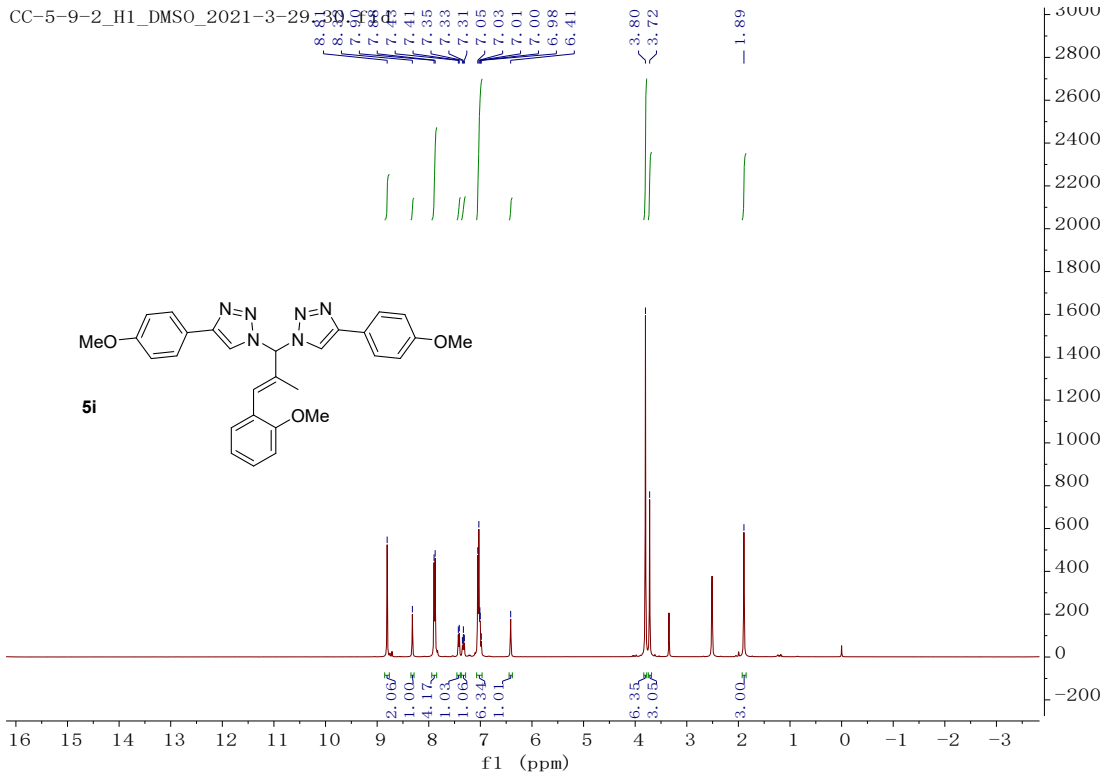

CC-5-9-2-DMSO-C13-2021

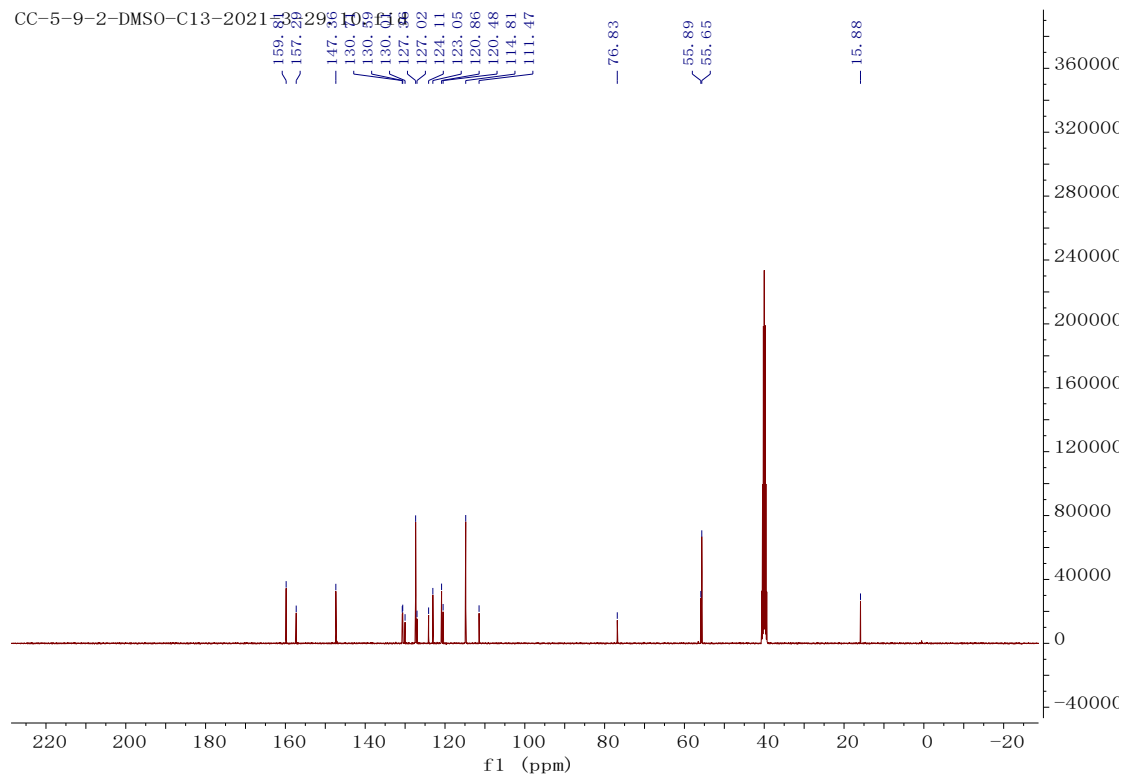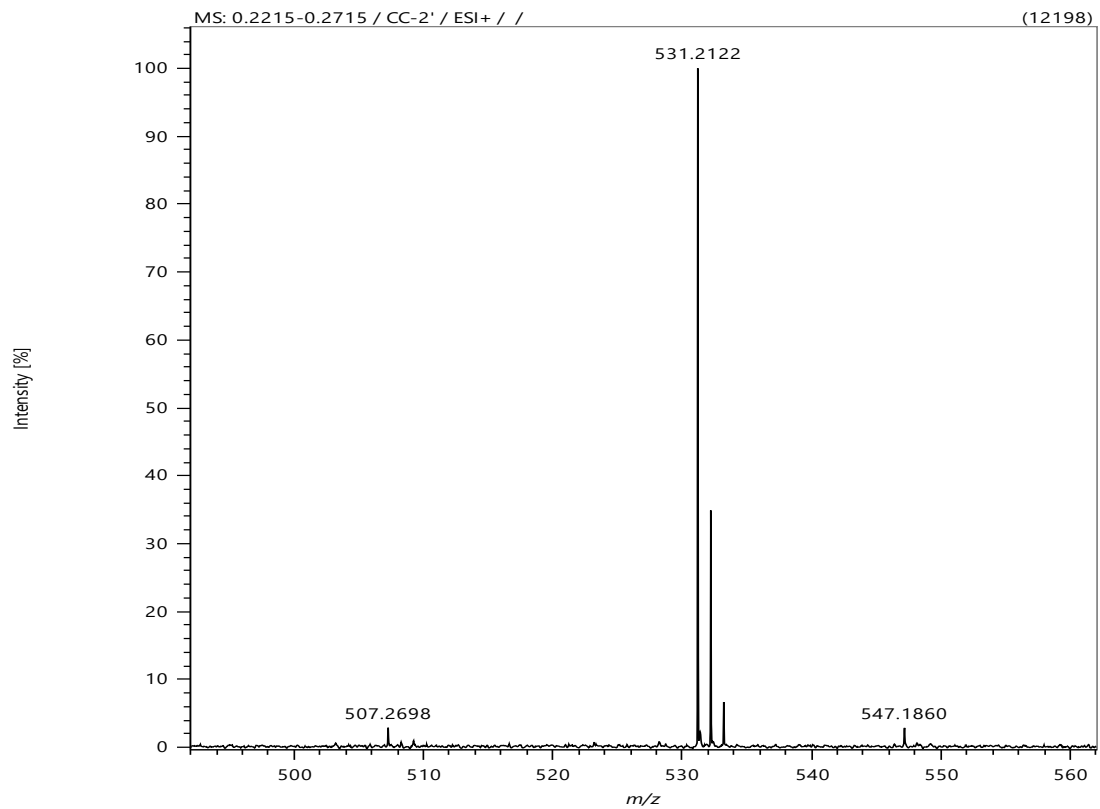

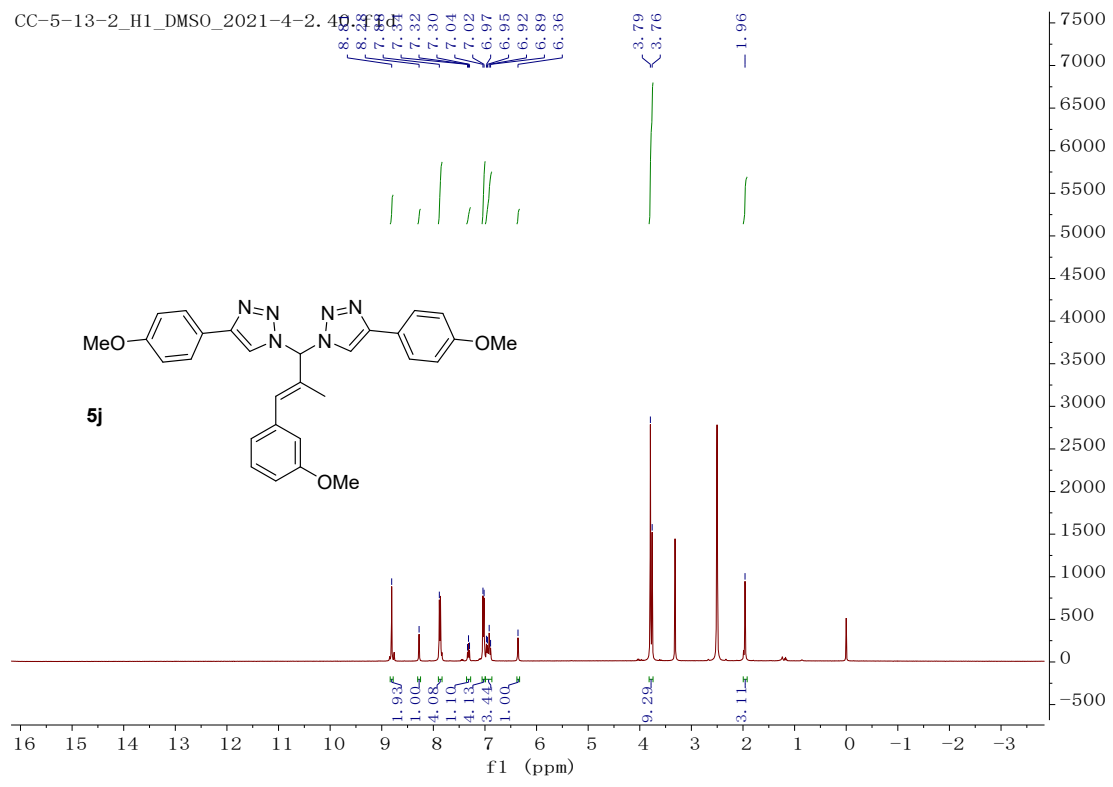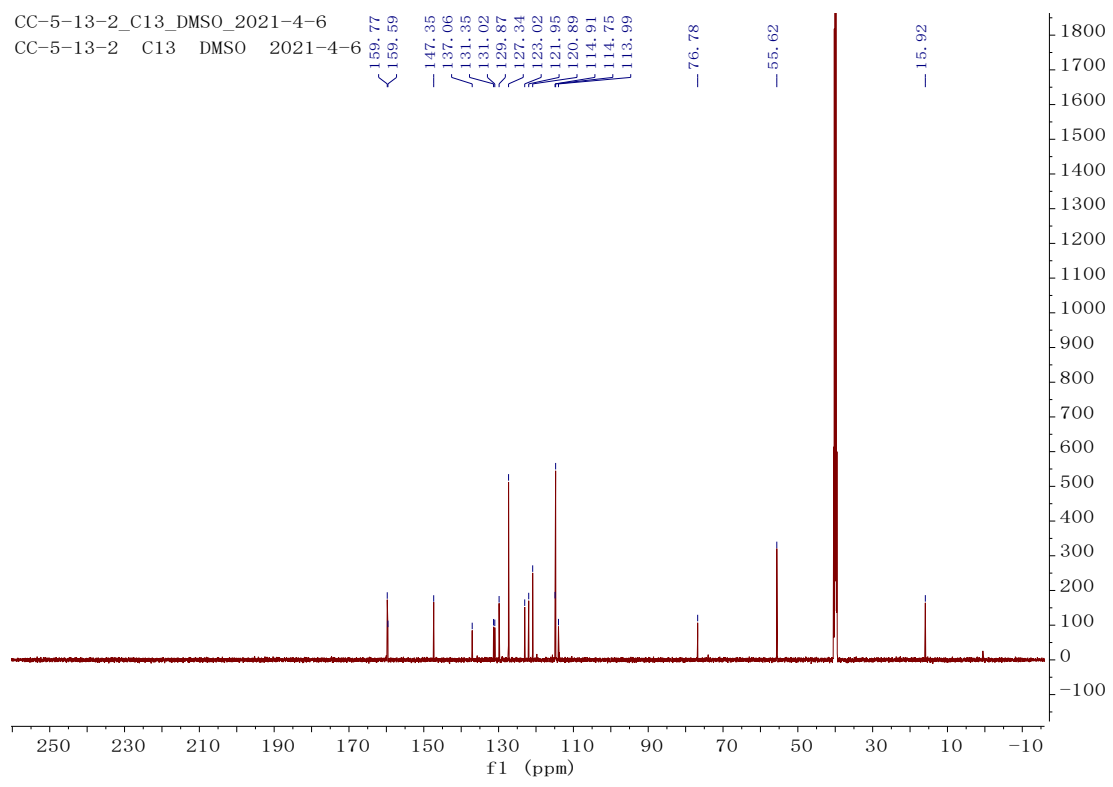

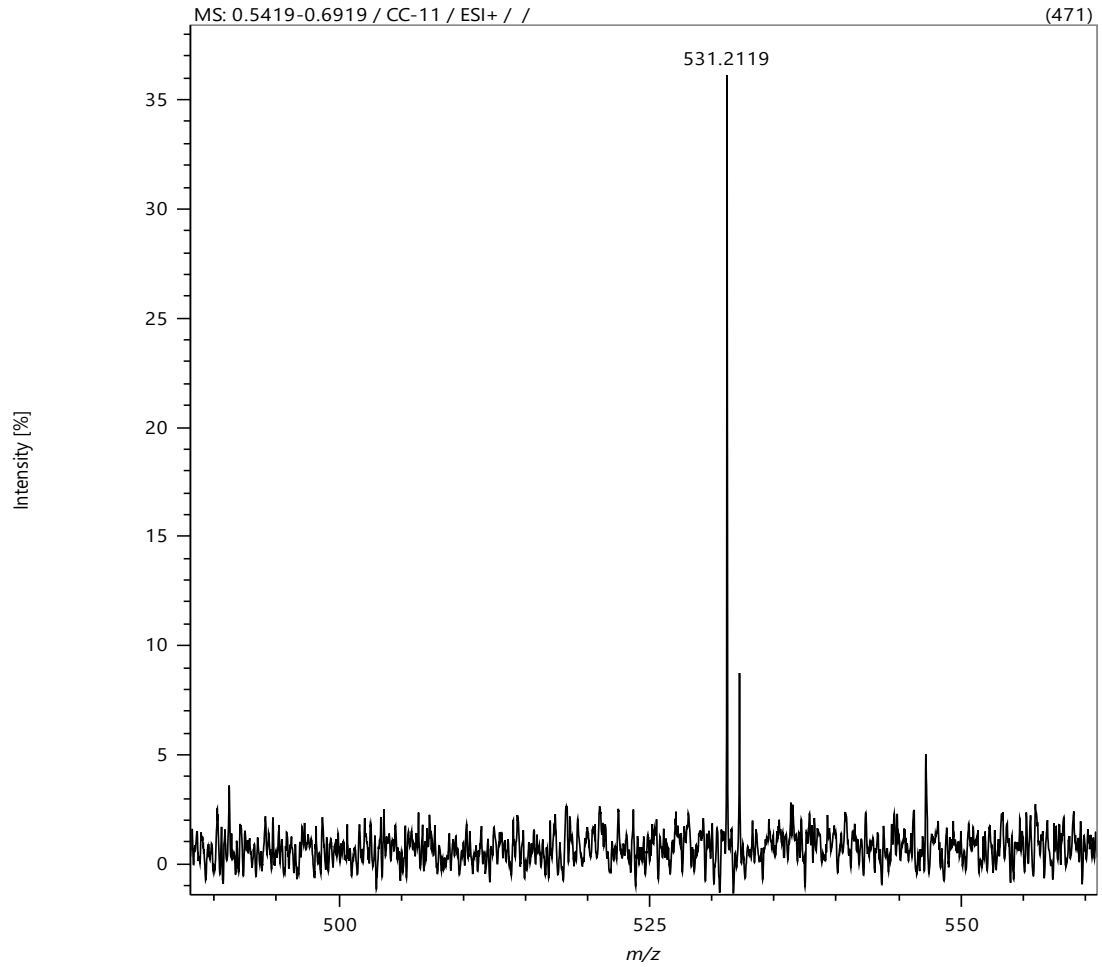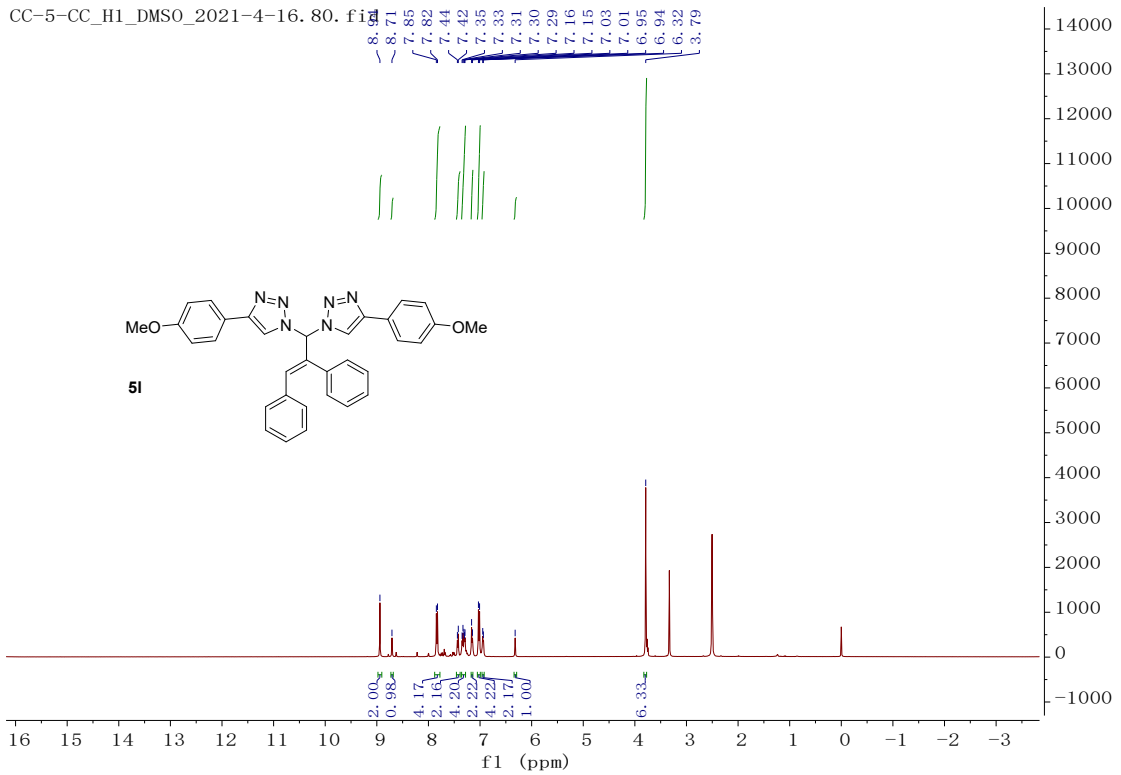



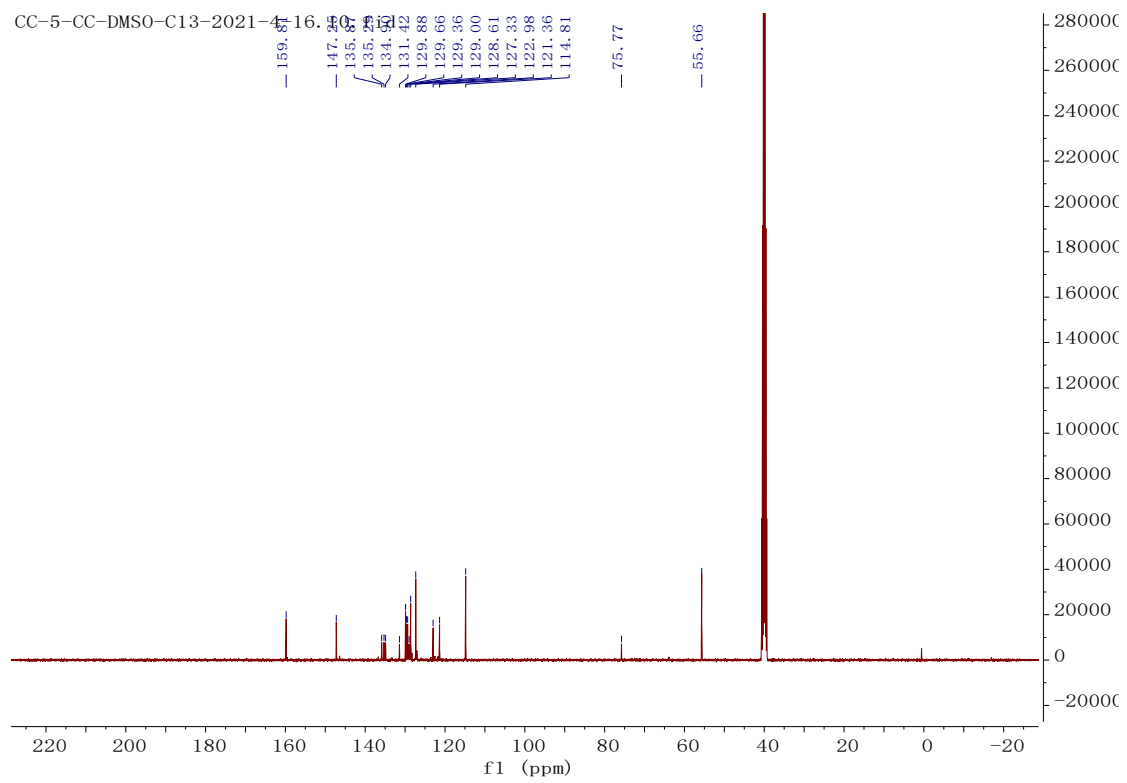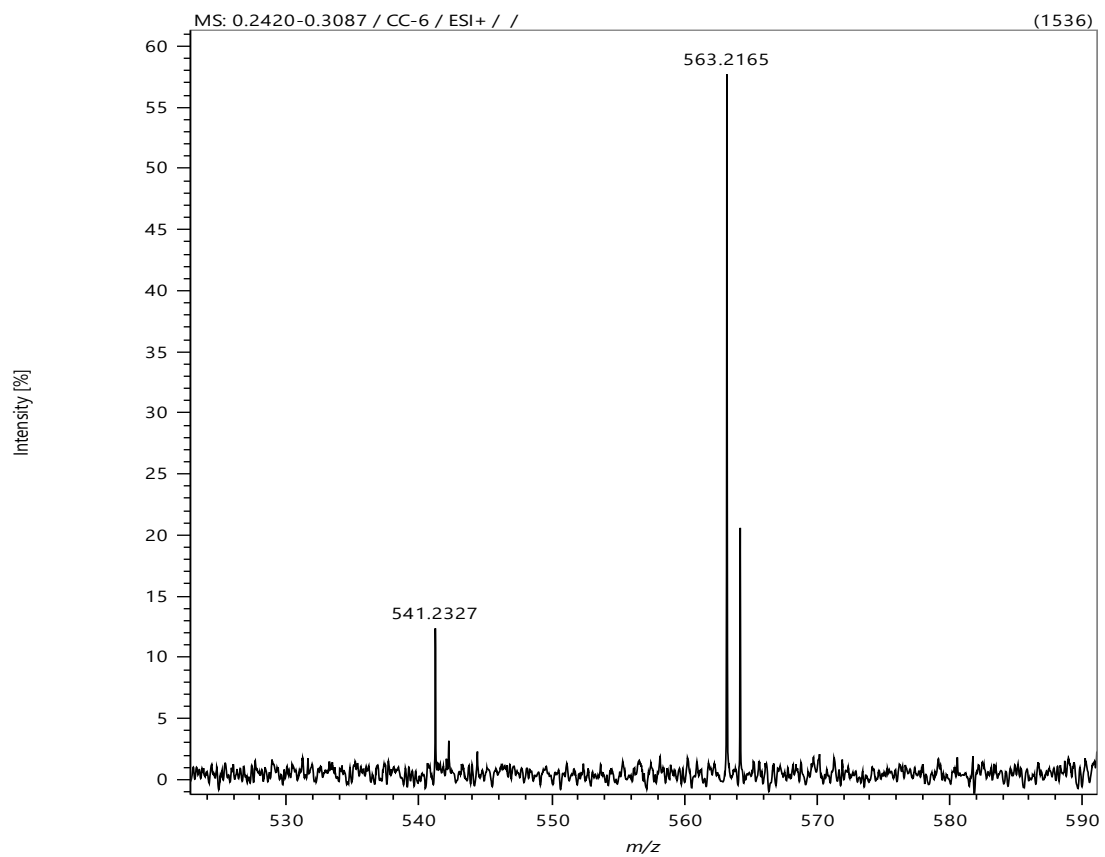

CC-5-28-DMSO-H1-2021-4-21. 10. fig

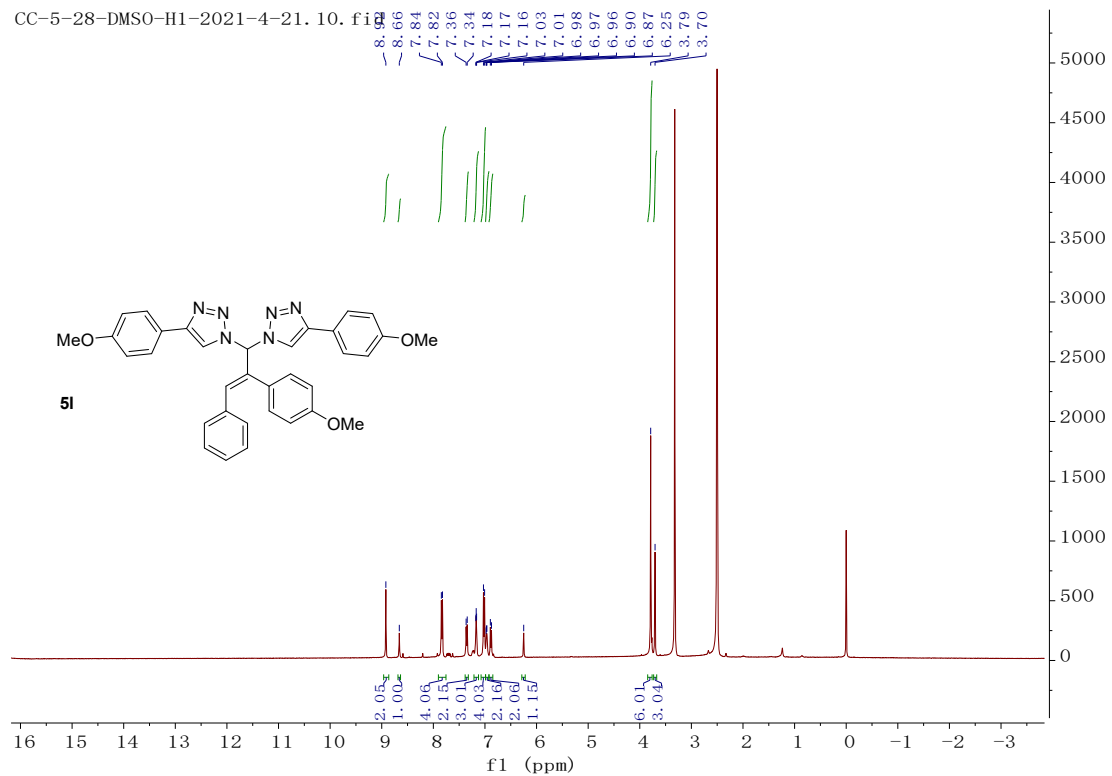

CC-5-28-DMSO-C13-2021-4-23. 10. fig

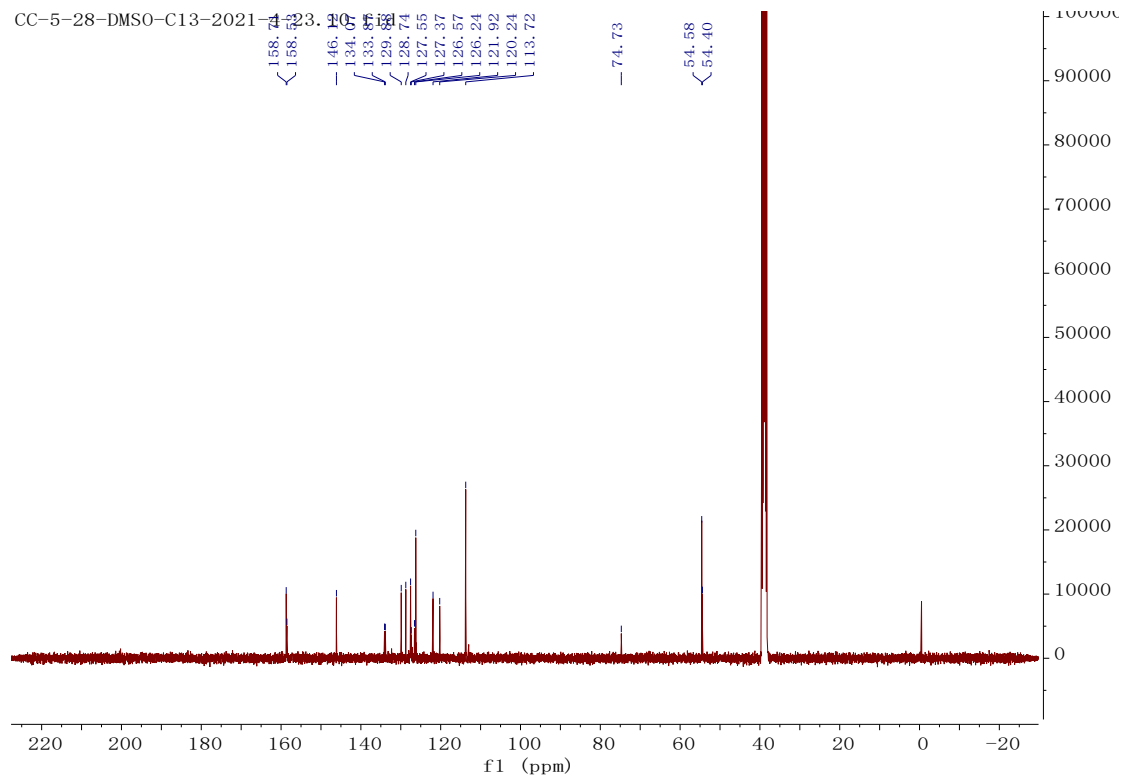

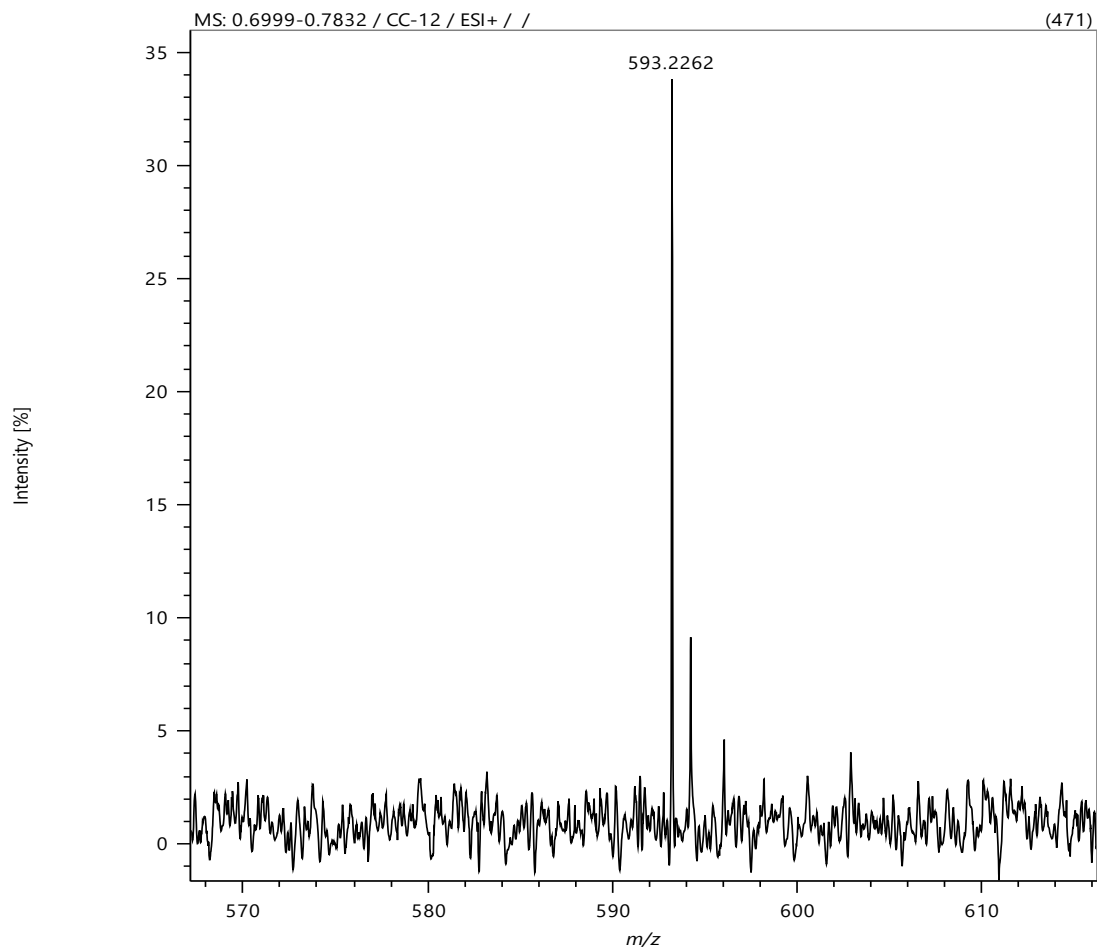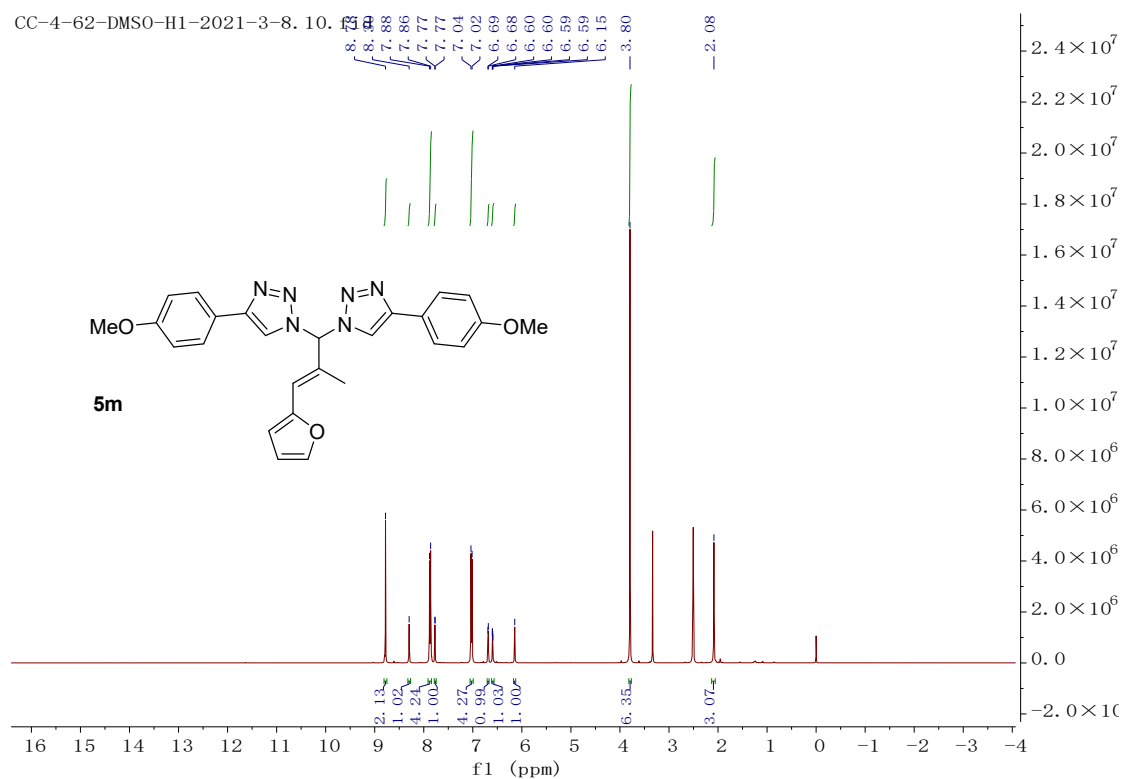

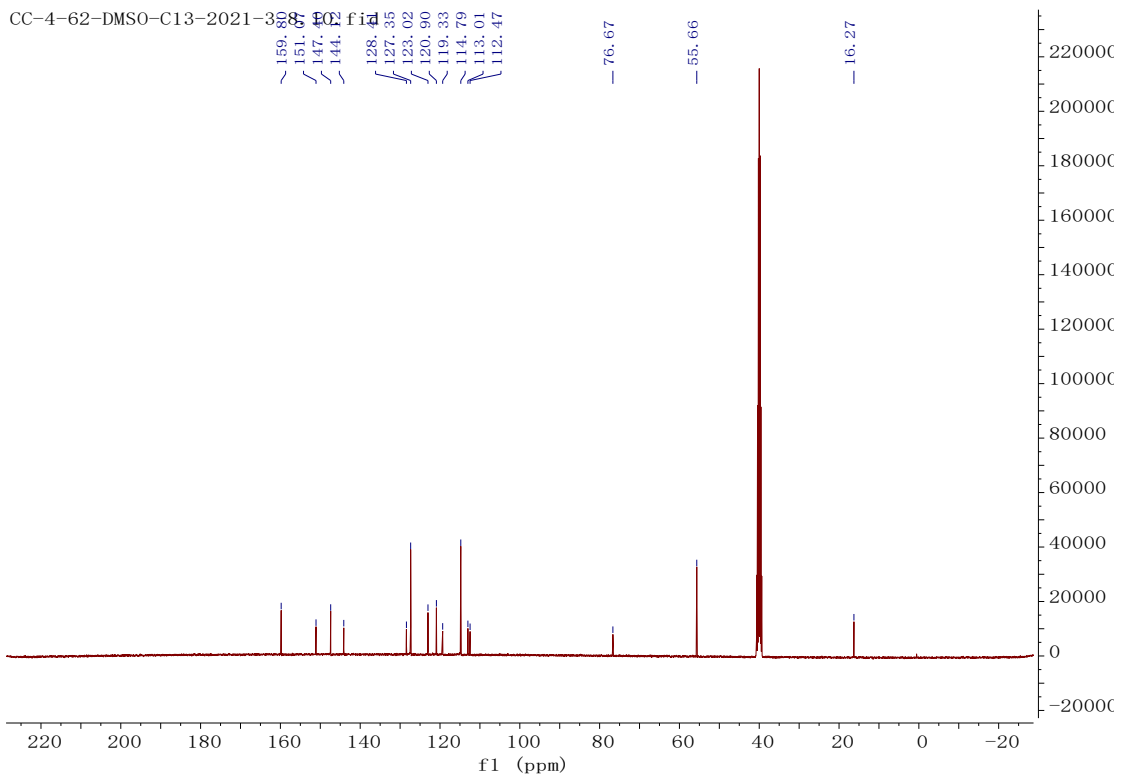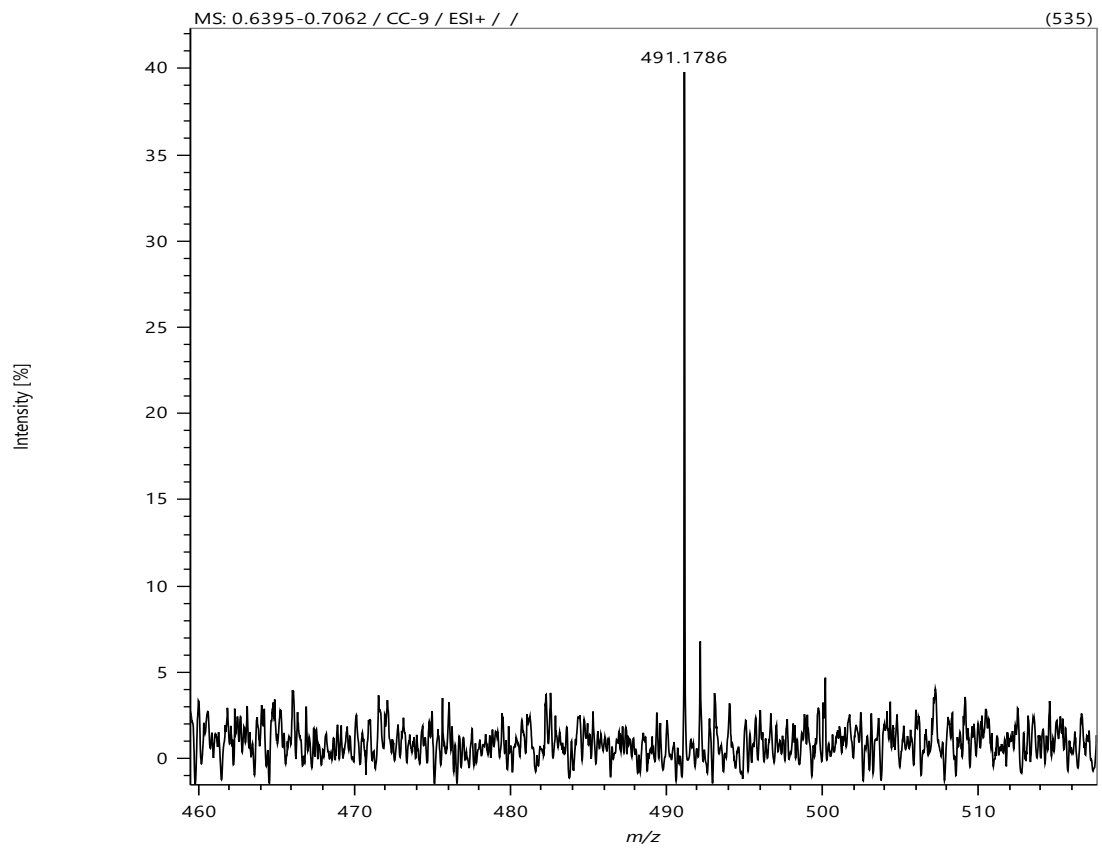

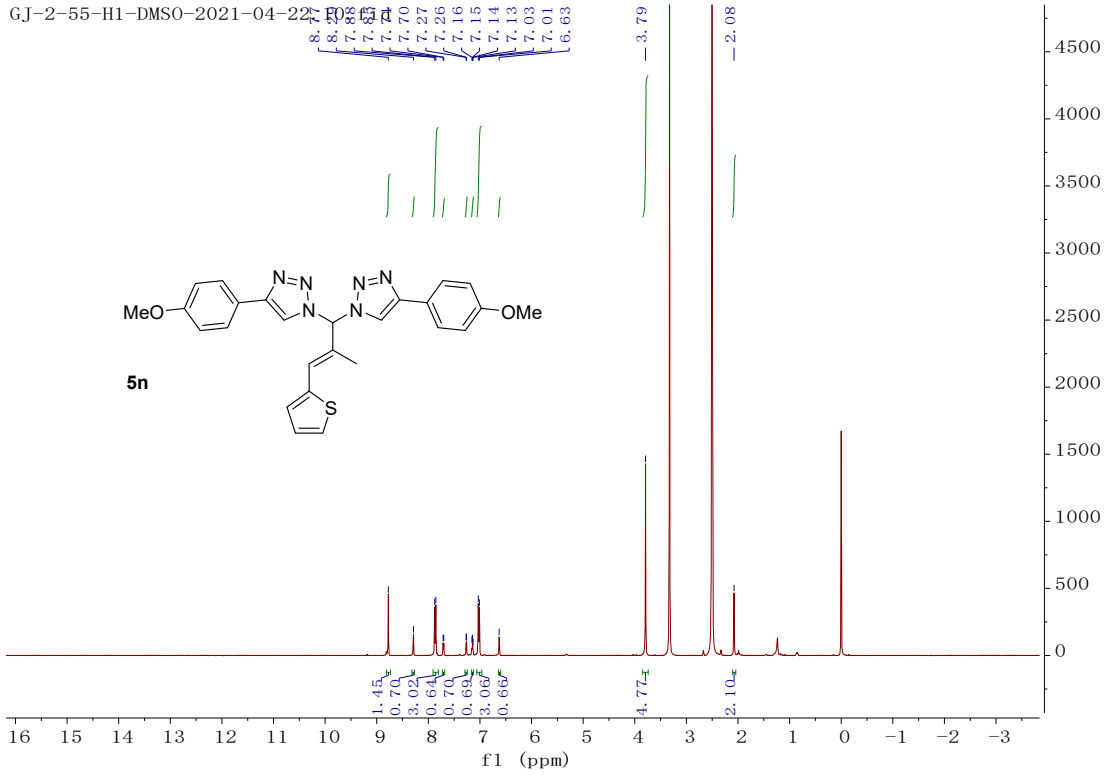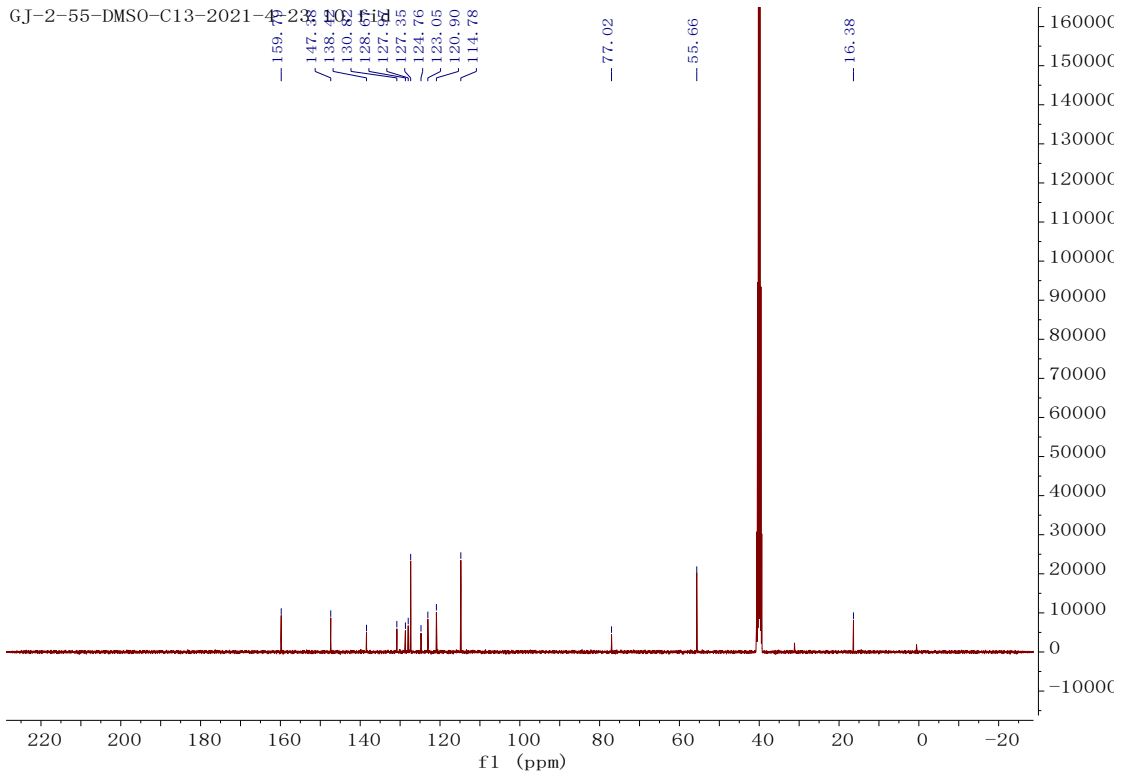

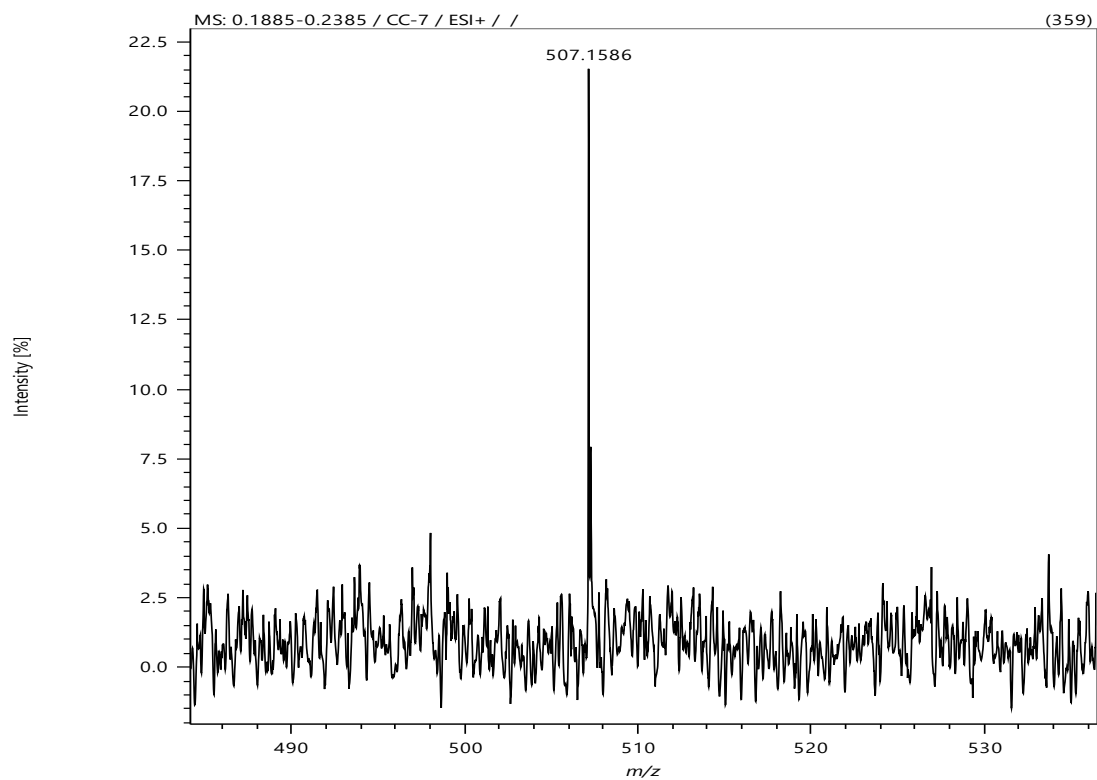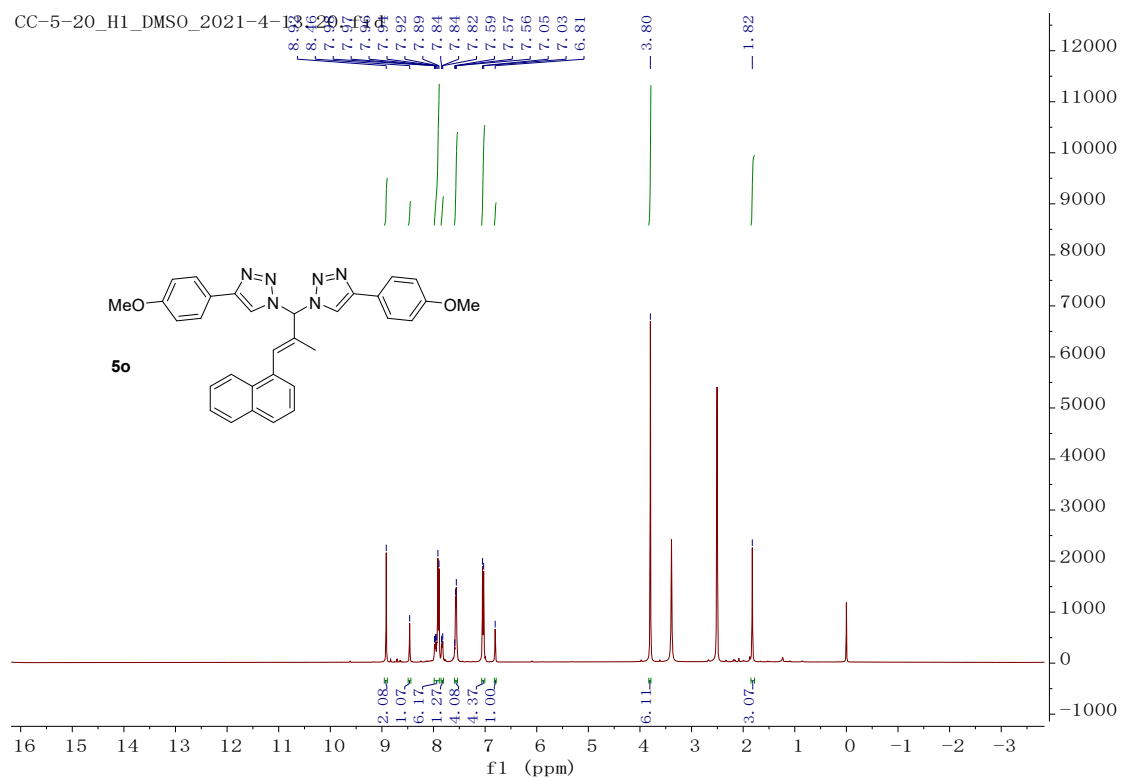

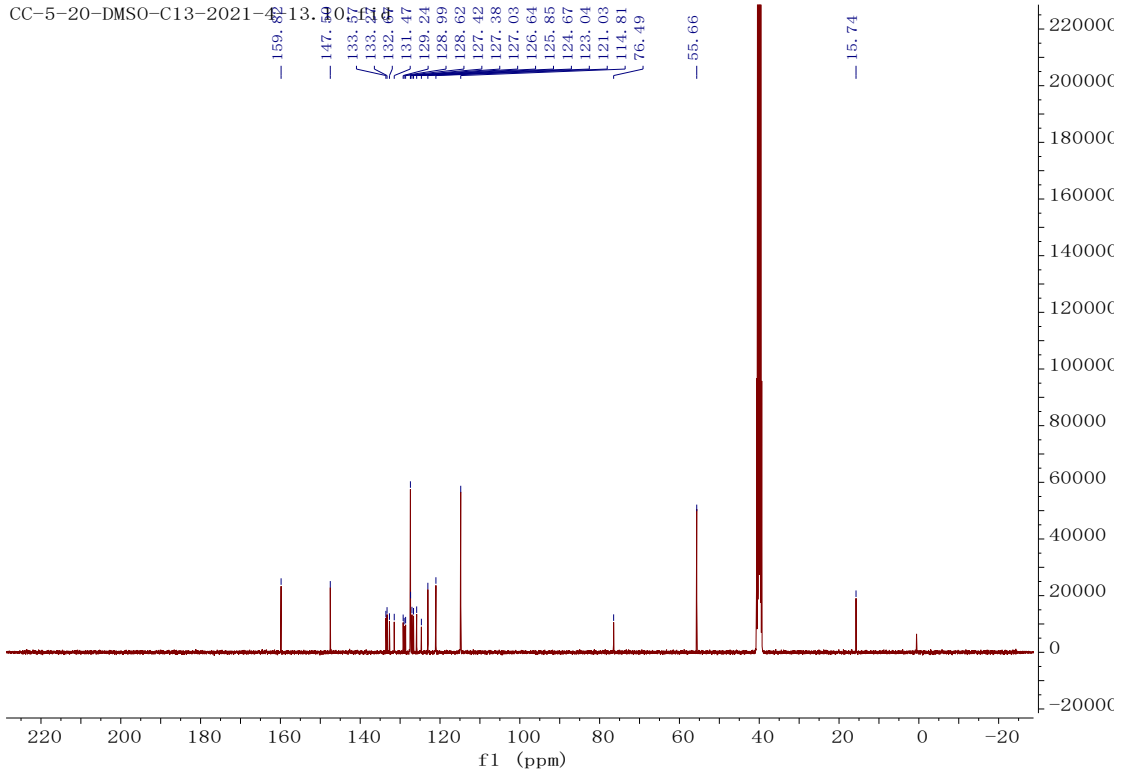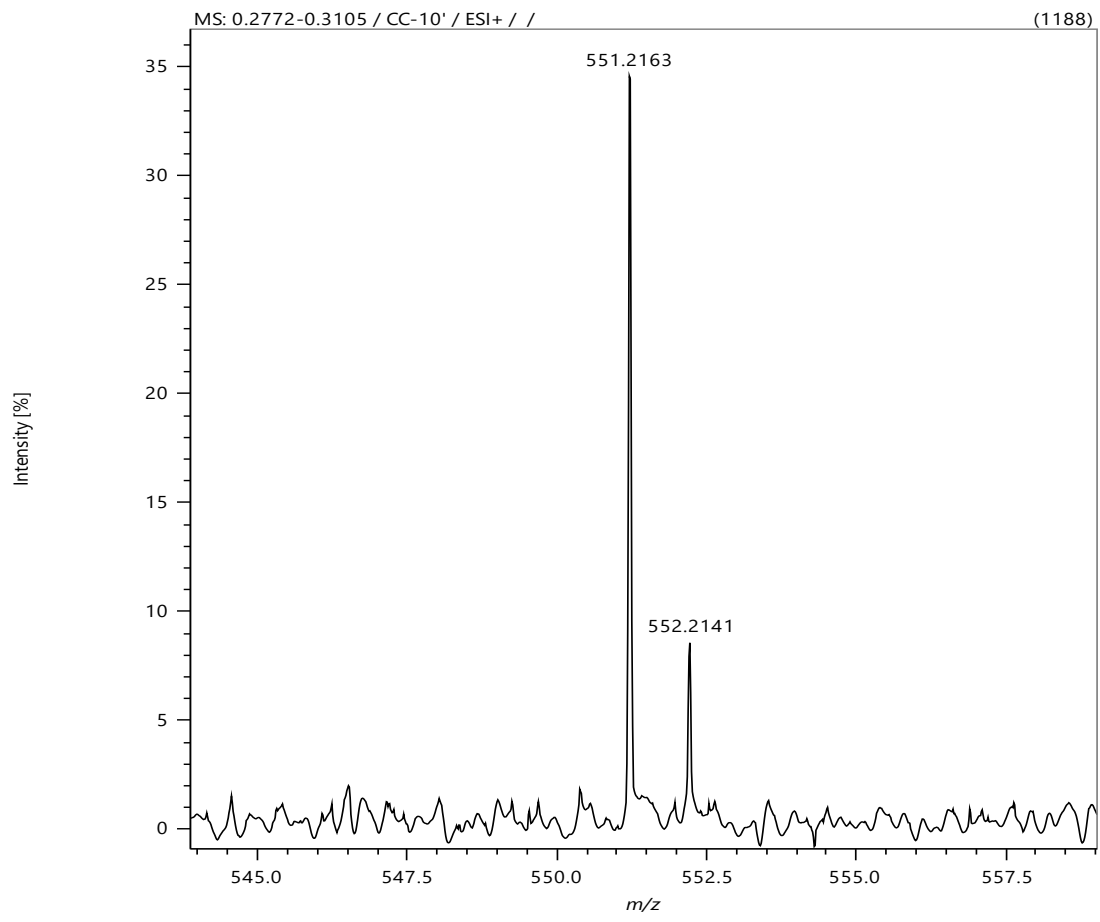

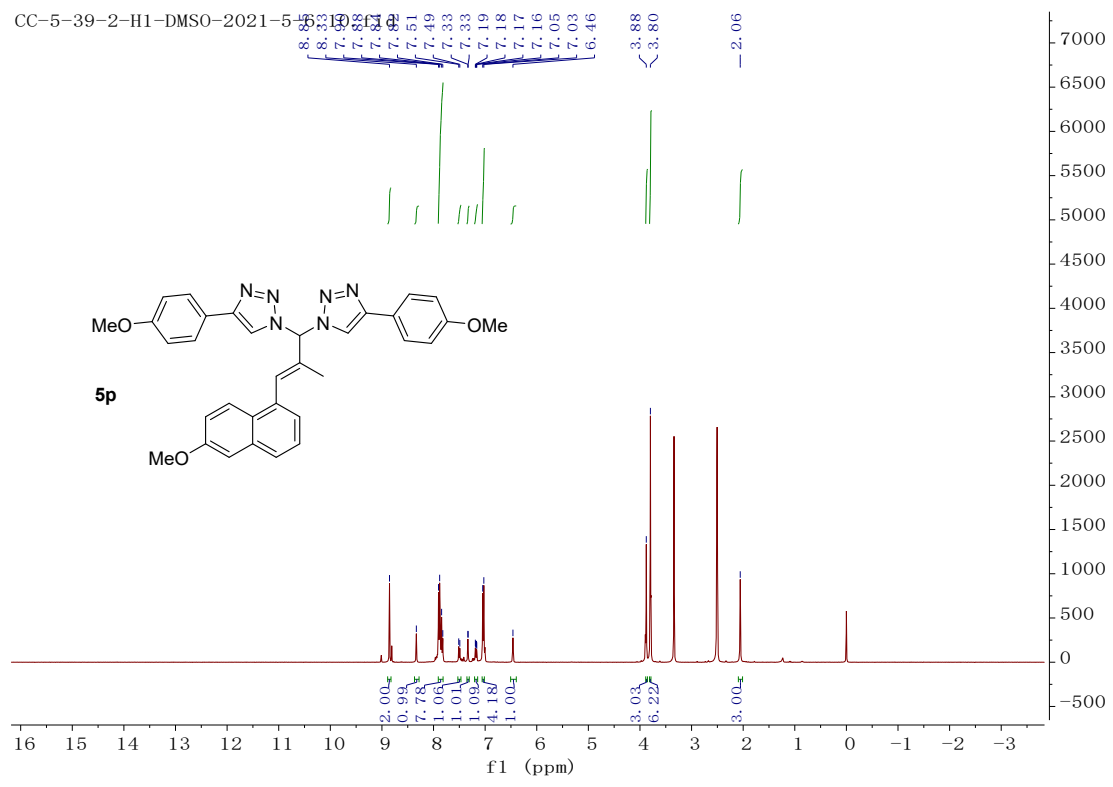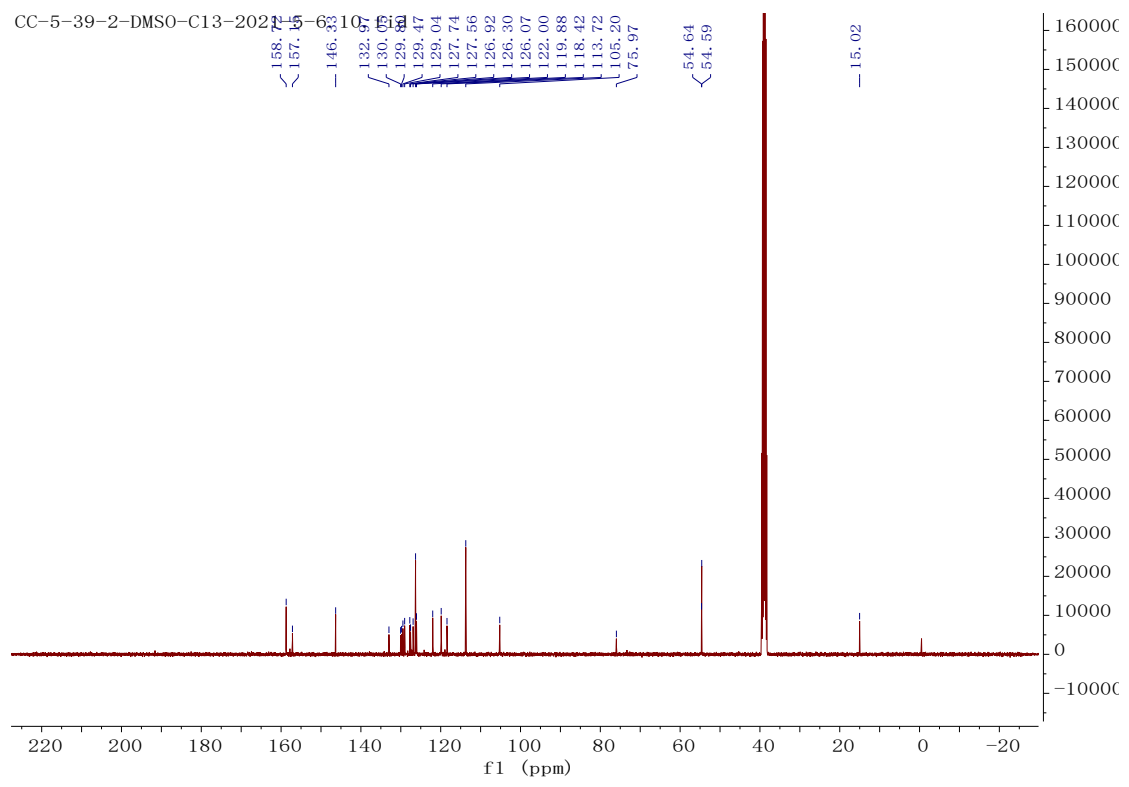



CC-30\_20210826154830 #18 RT: 0.08 AV: 1 NL: 3.21E7  
 T: FTMS + p ESI Full ms [100.0000-1000.0000]

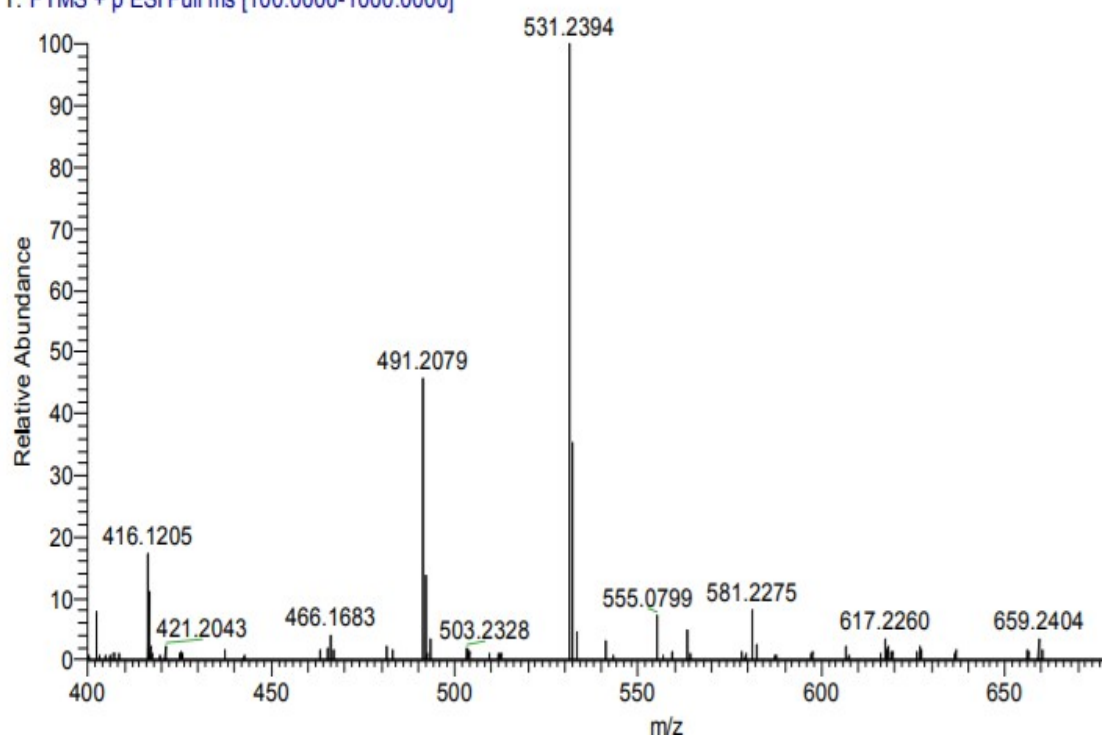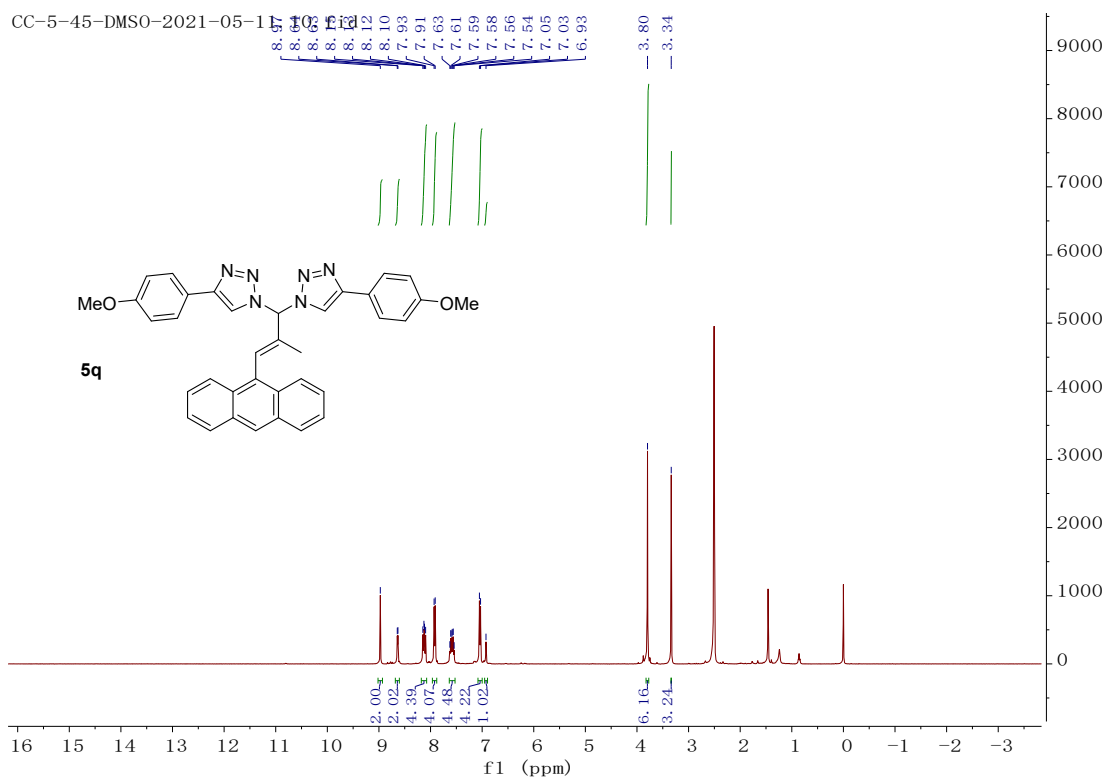

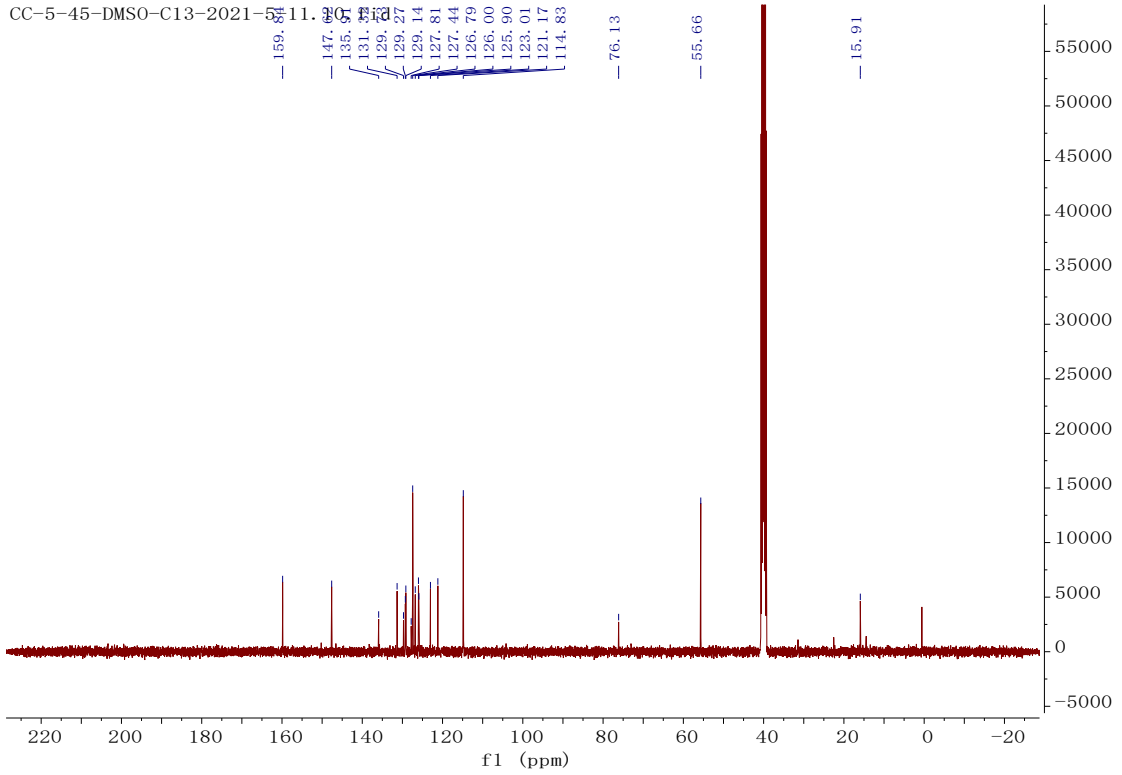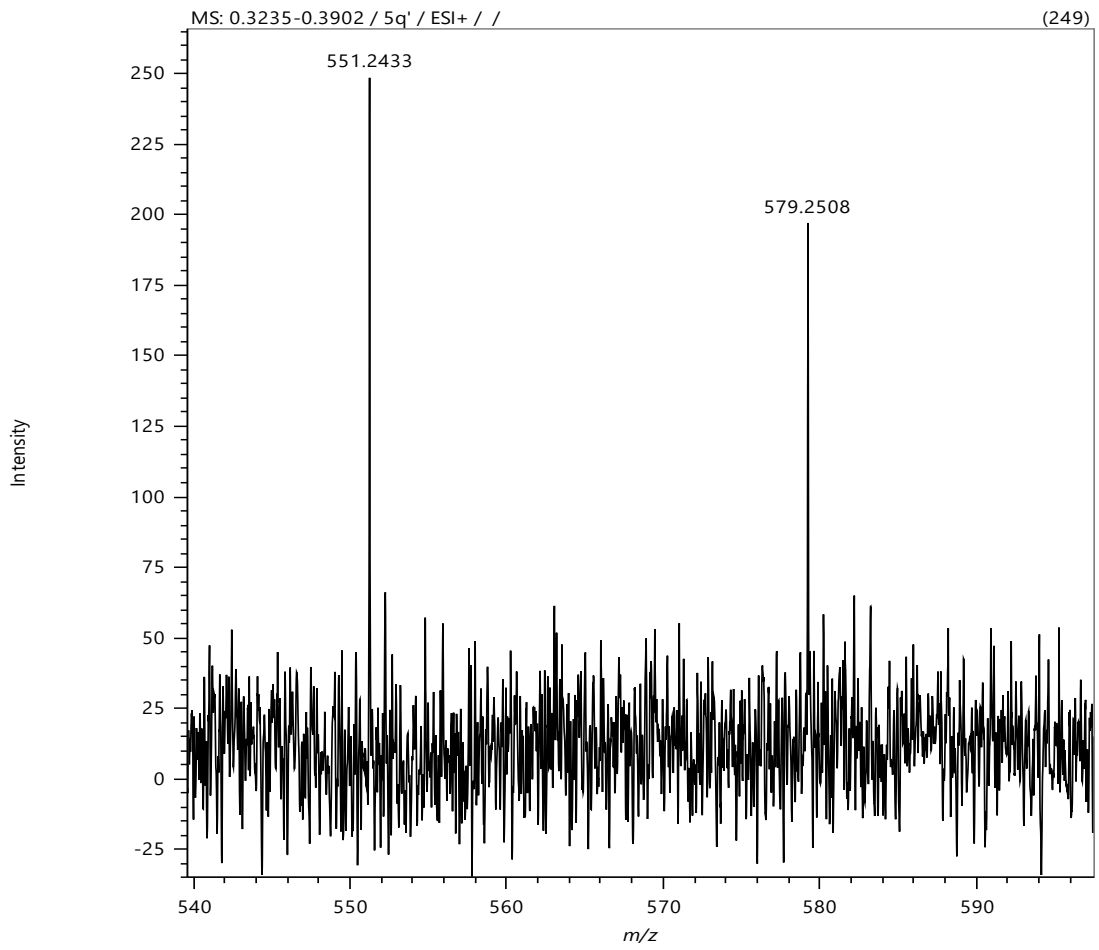

CC-6-0-DMSO.10.fid

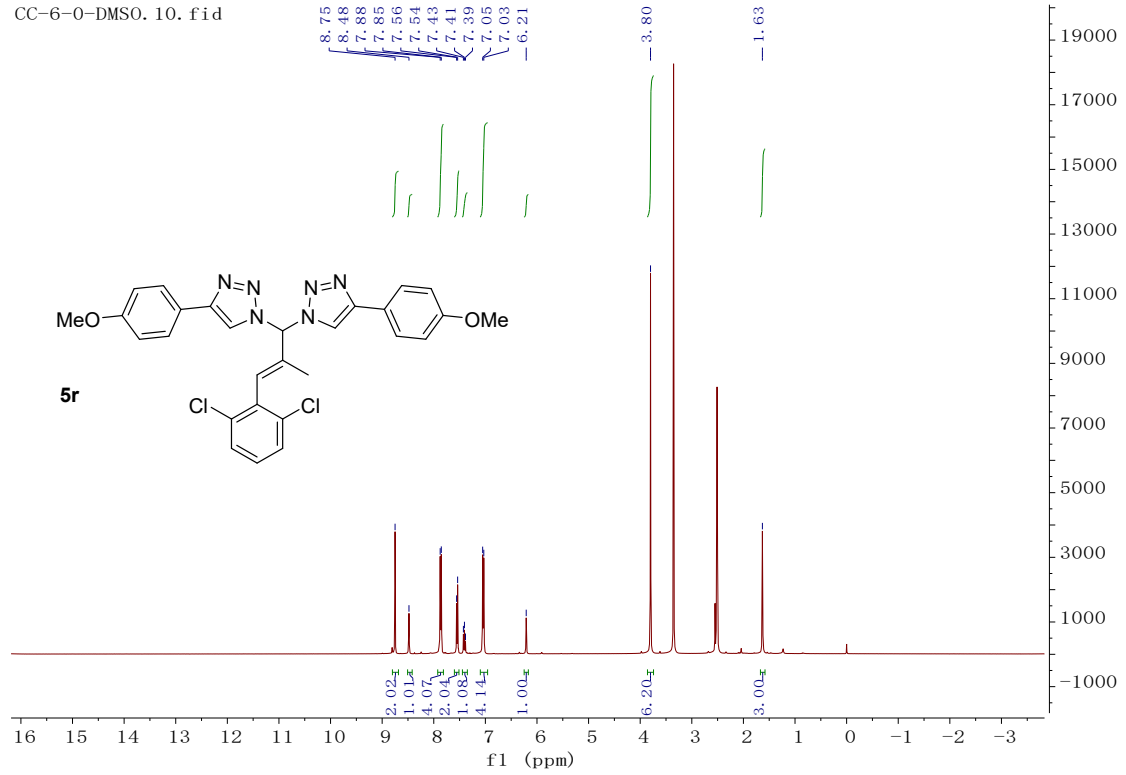

CC-6-0-DMSO-C13-2021-6-22.10

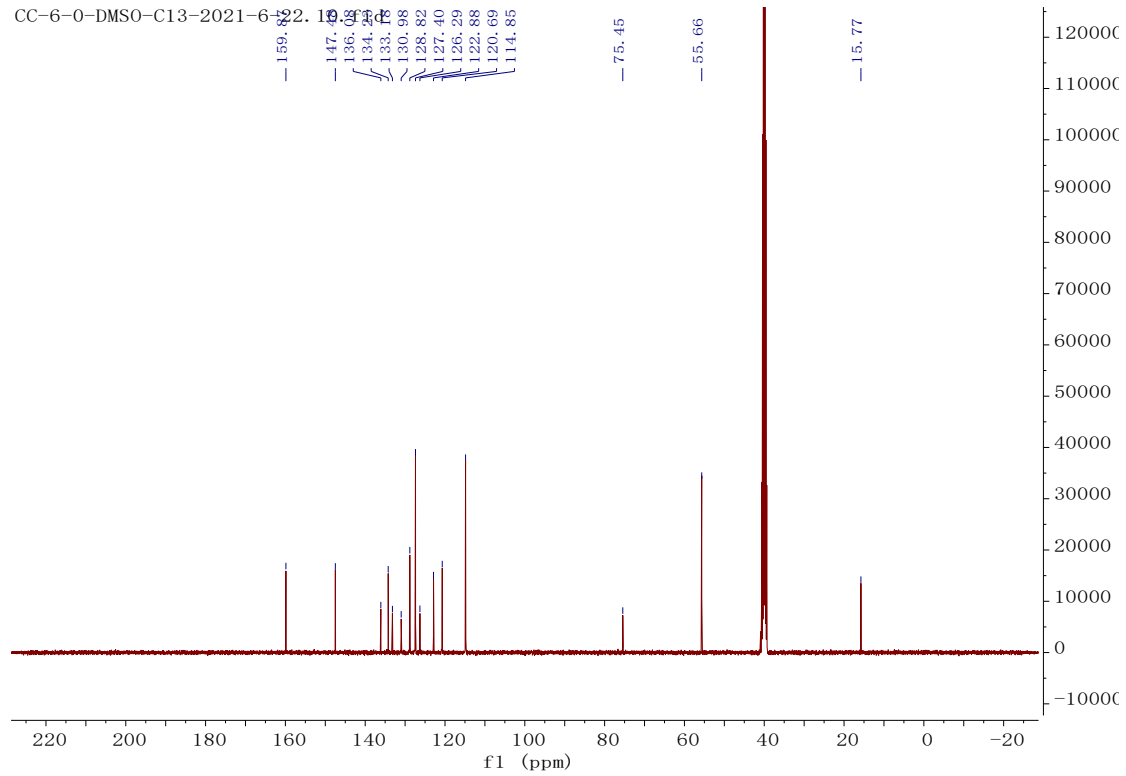

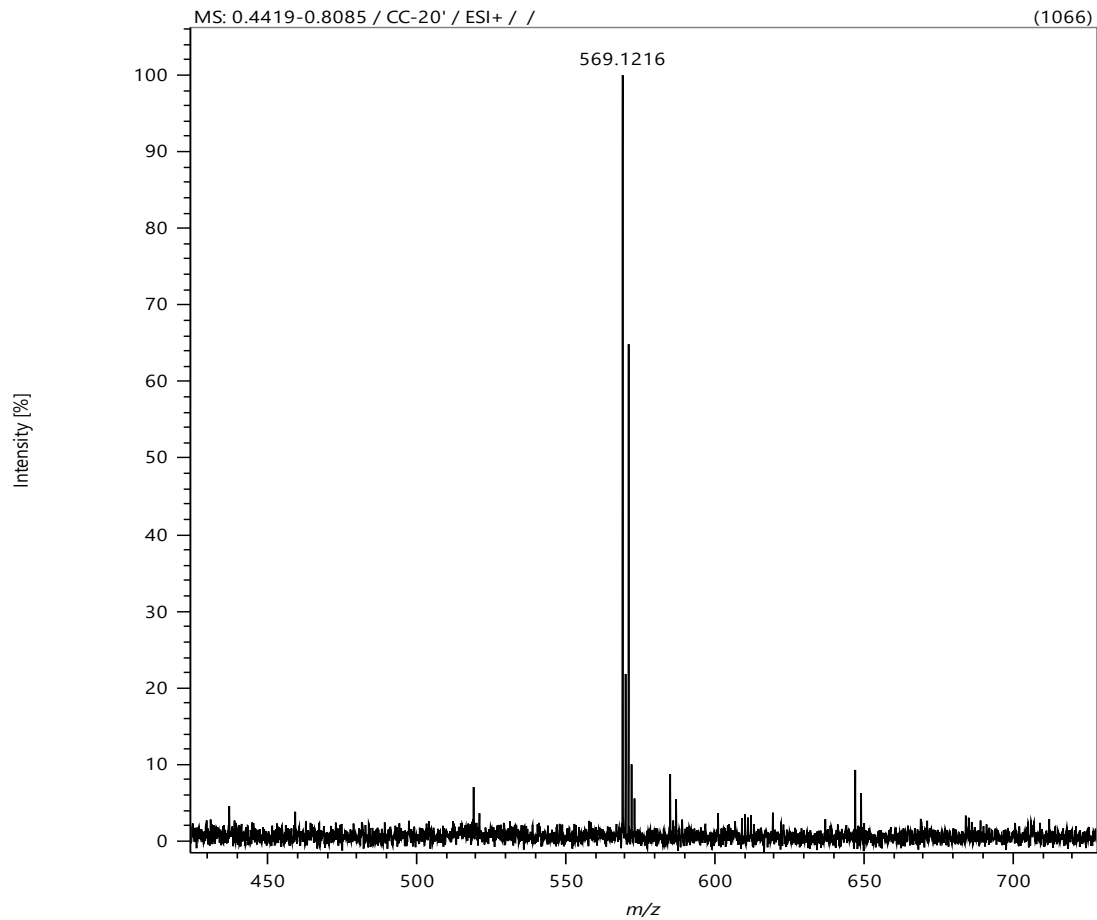

8.98  
8.95  
8.31  
8.29  
7.85  
7.85  
7.84  
7.83  
7.66  
7.64  
7.45  
7.45  
7.43  
7.41  
7.40  
7.40  
7.39  
7.38  
7.38  
7.37  
7.36  
7.35  
7.33  
7.13  
7.09  
7.04  
7.02  
3.79  
3.79

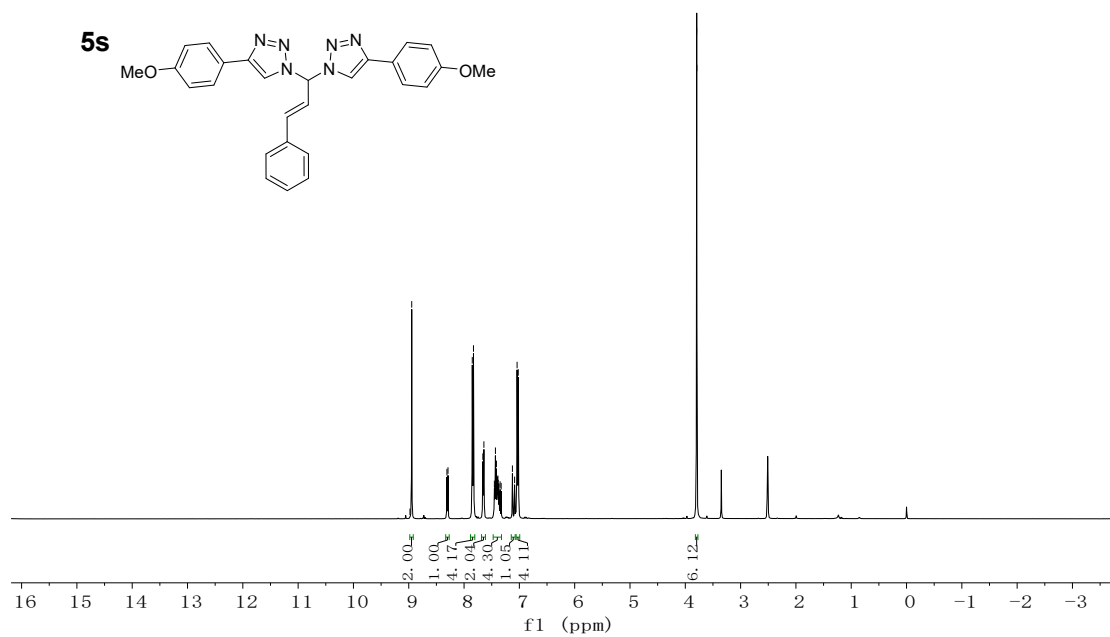

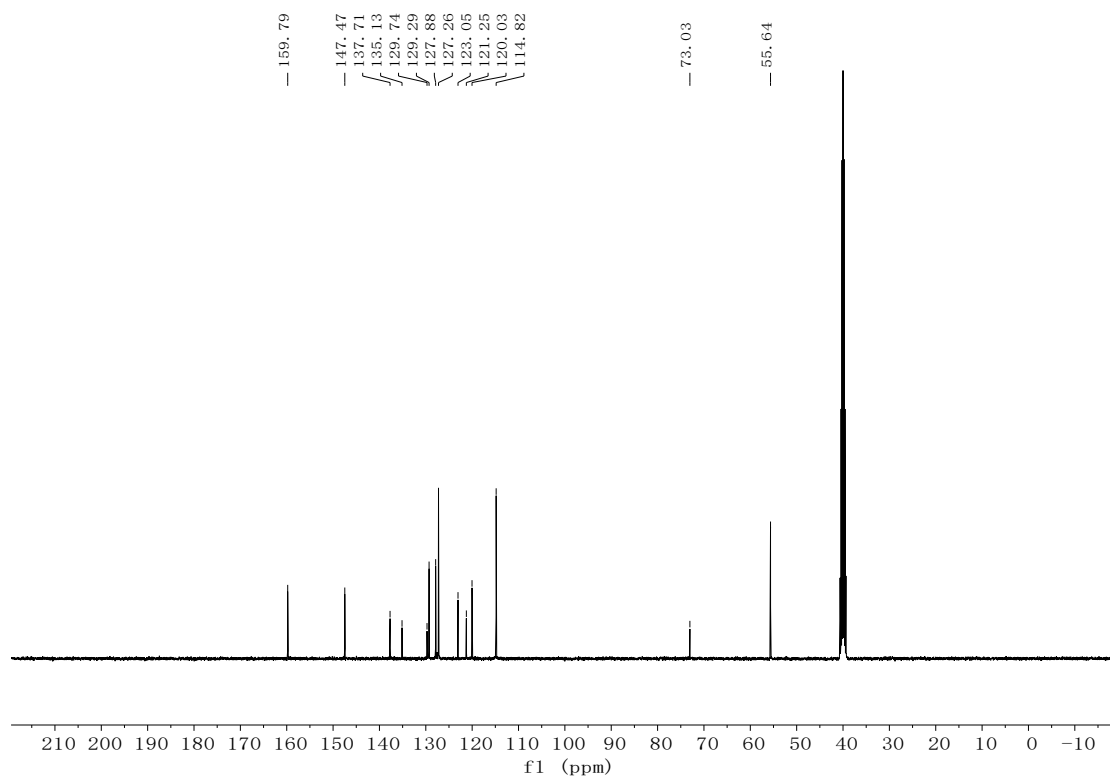

7#18 RT: 0.3058 AV: 1 NL: 2.19E5  
 T: FTMS + p NSI Full ms [50.00-1000.00]

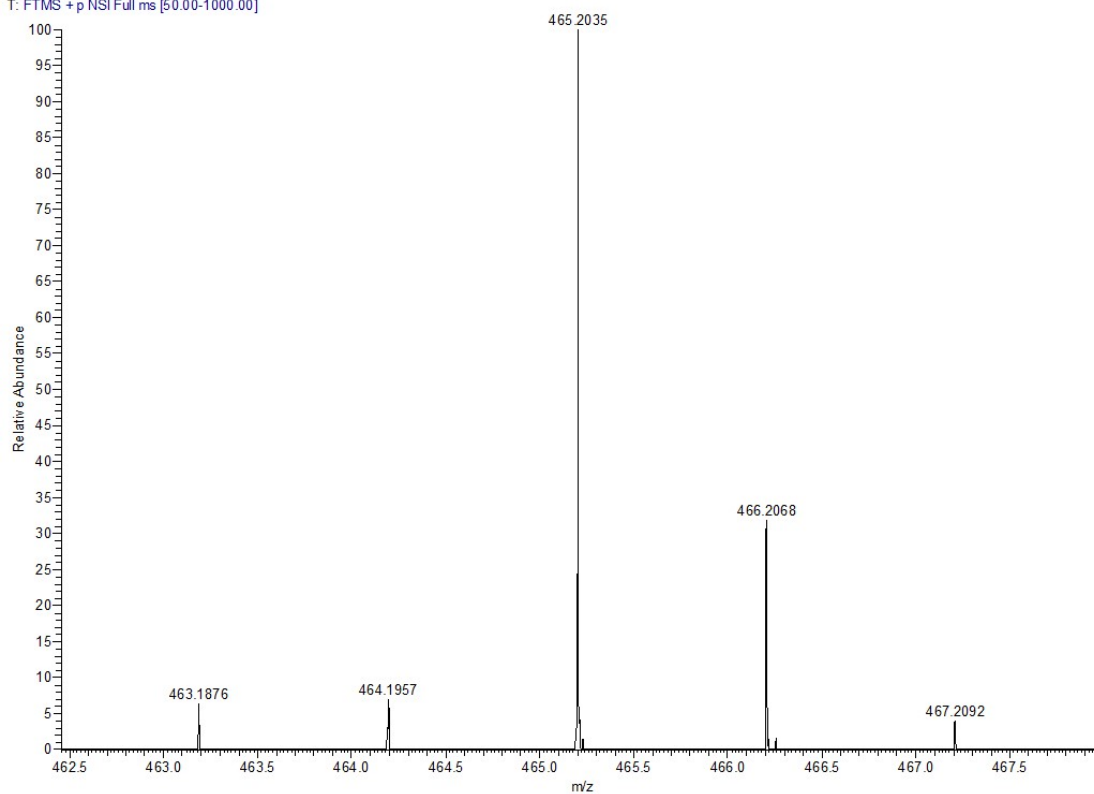

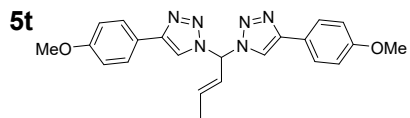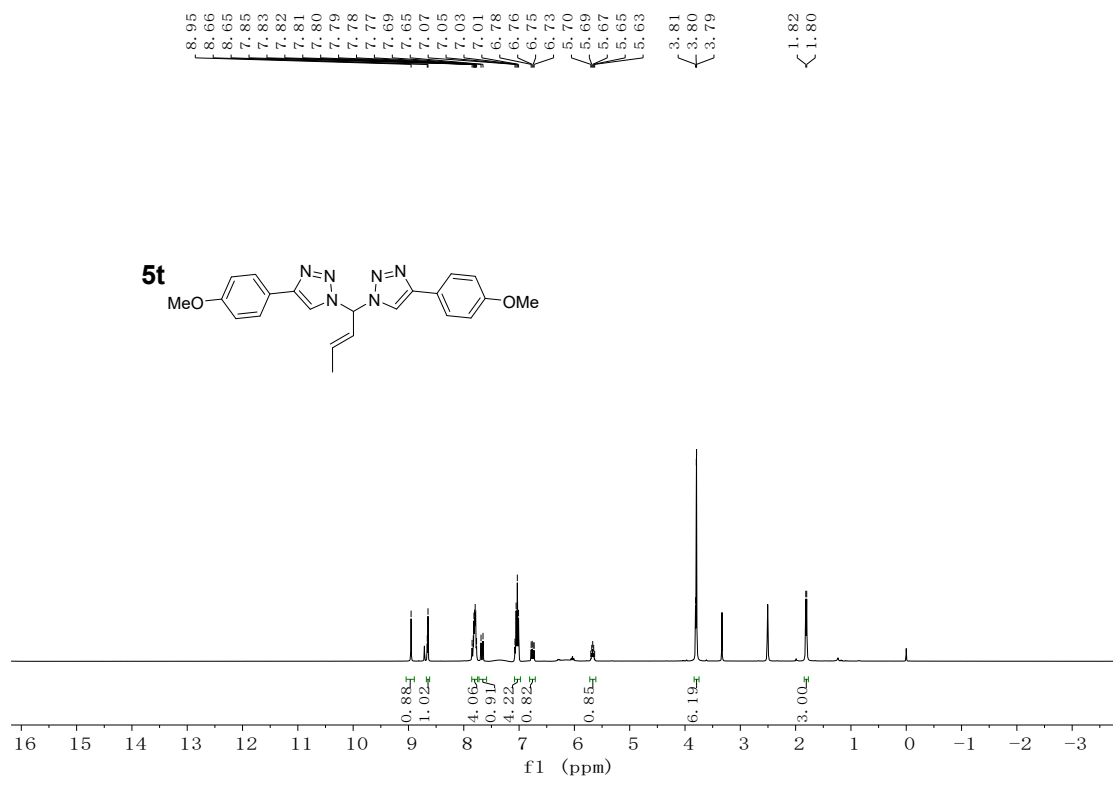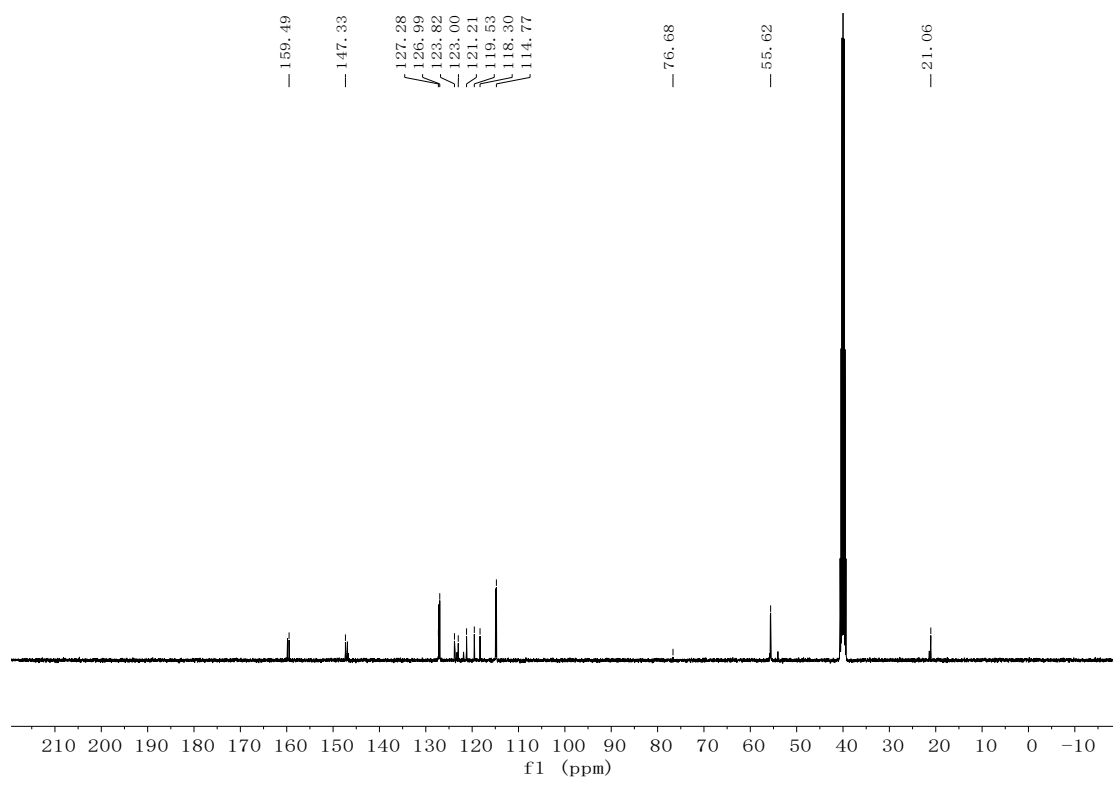

8#12 RT: 0.1912 AV: 1 NL: 729E5  
T: FTMS + p NSI Full ms [50.00-1000.00]

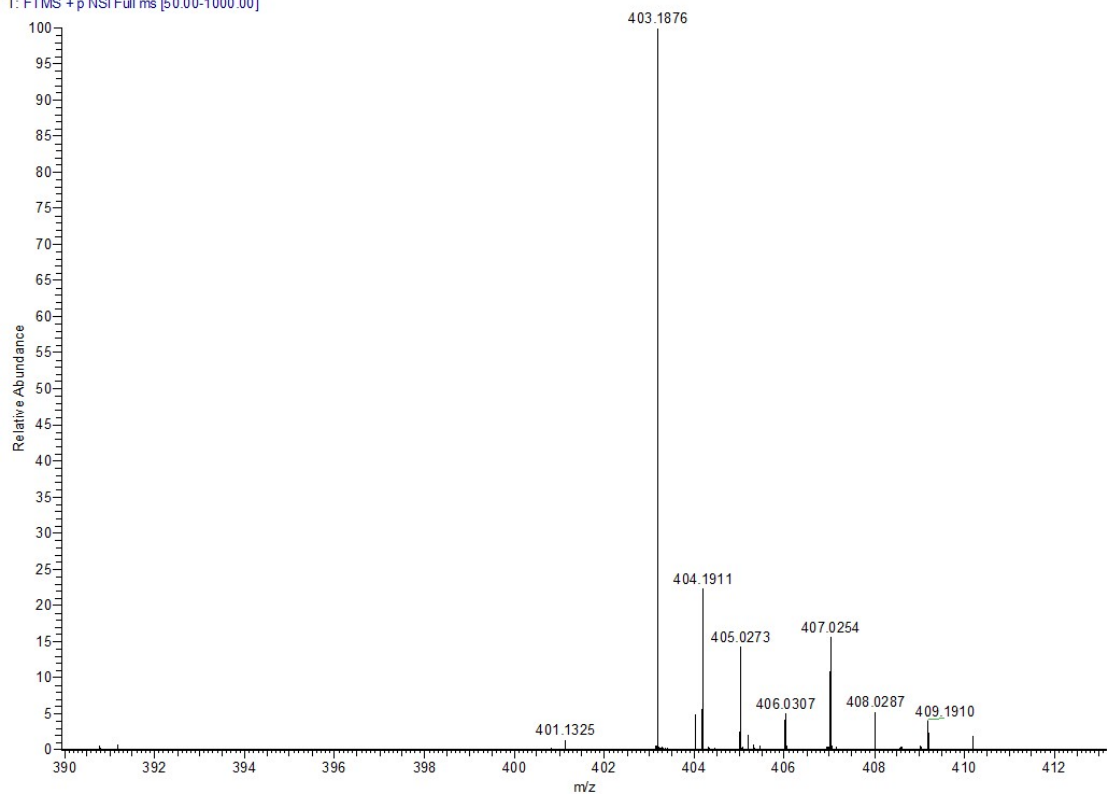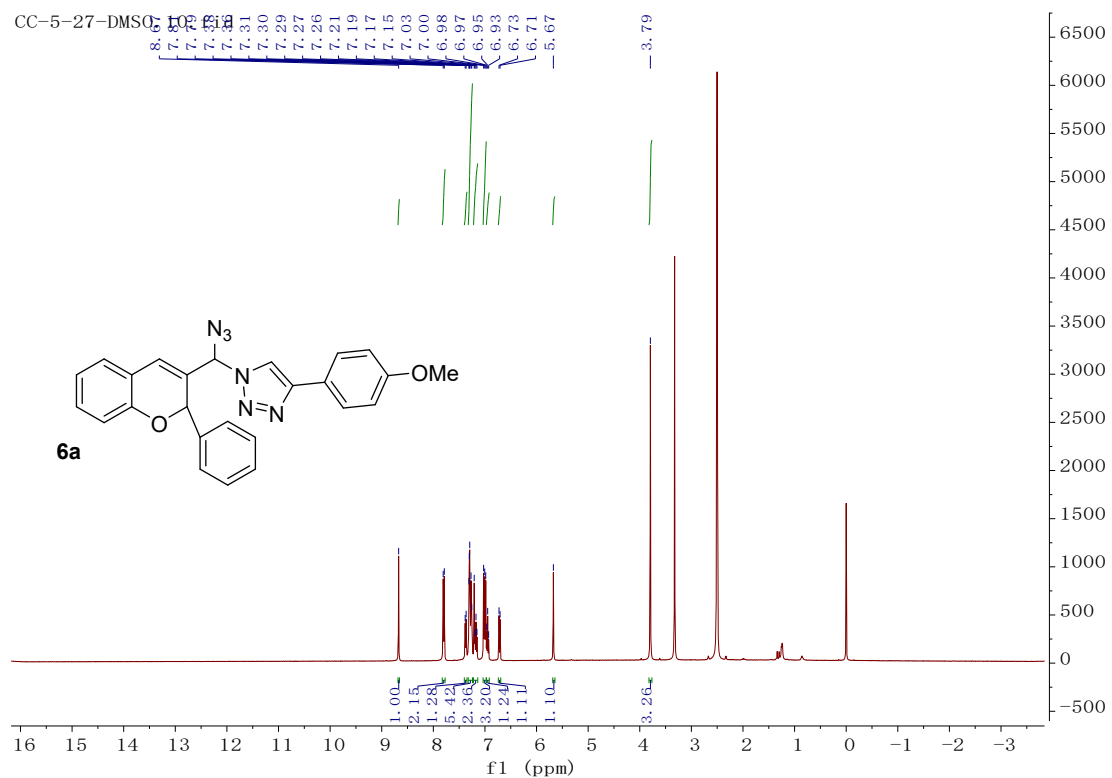

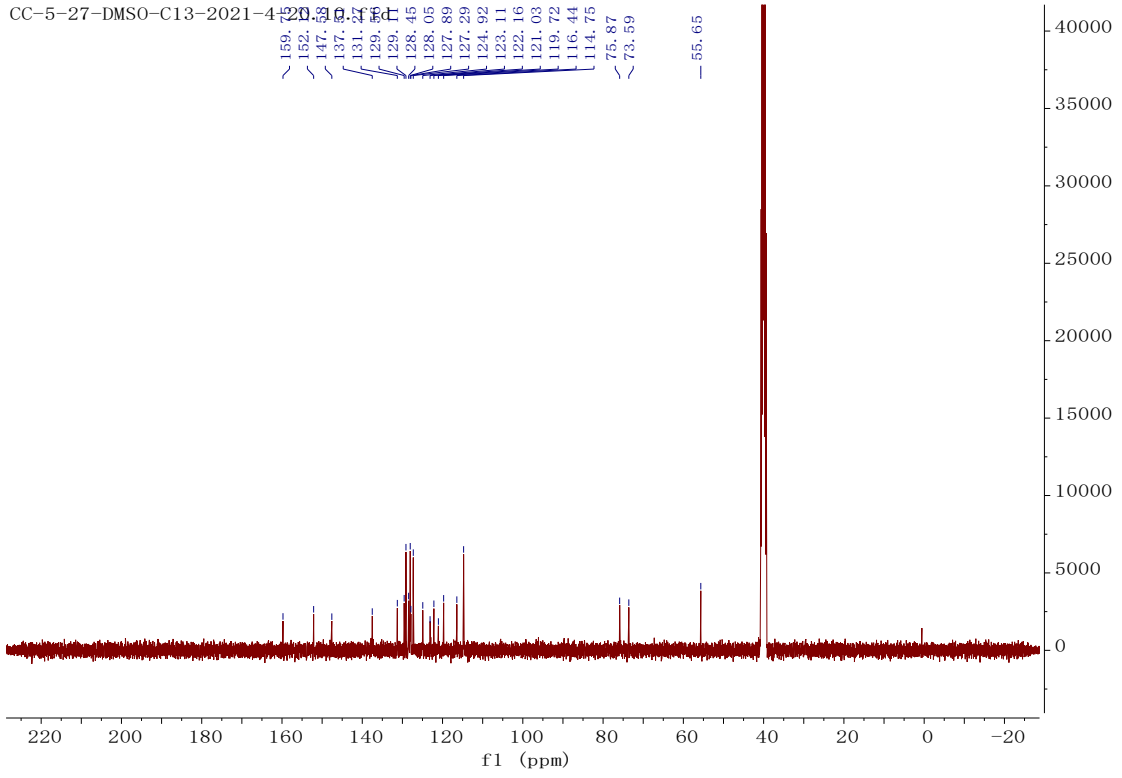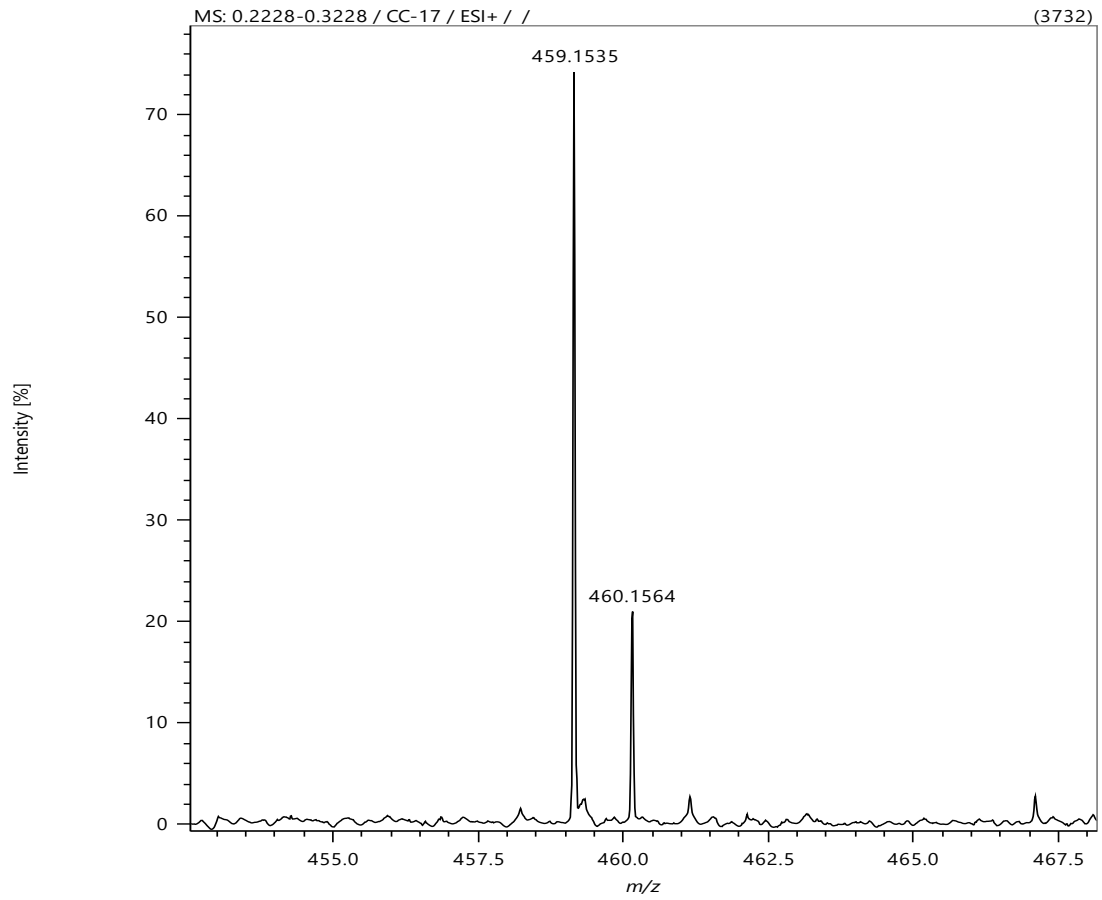



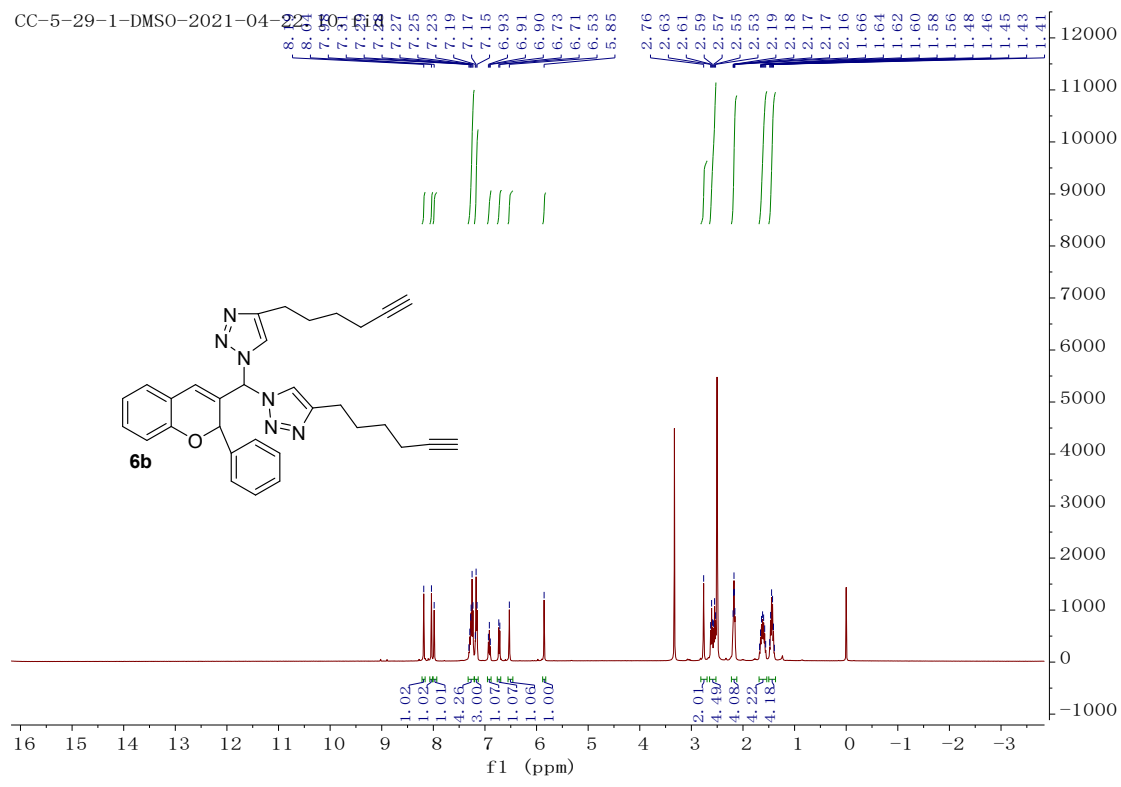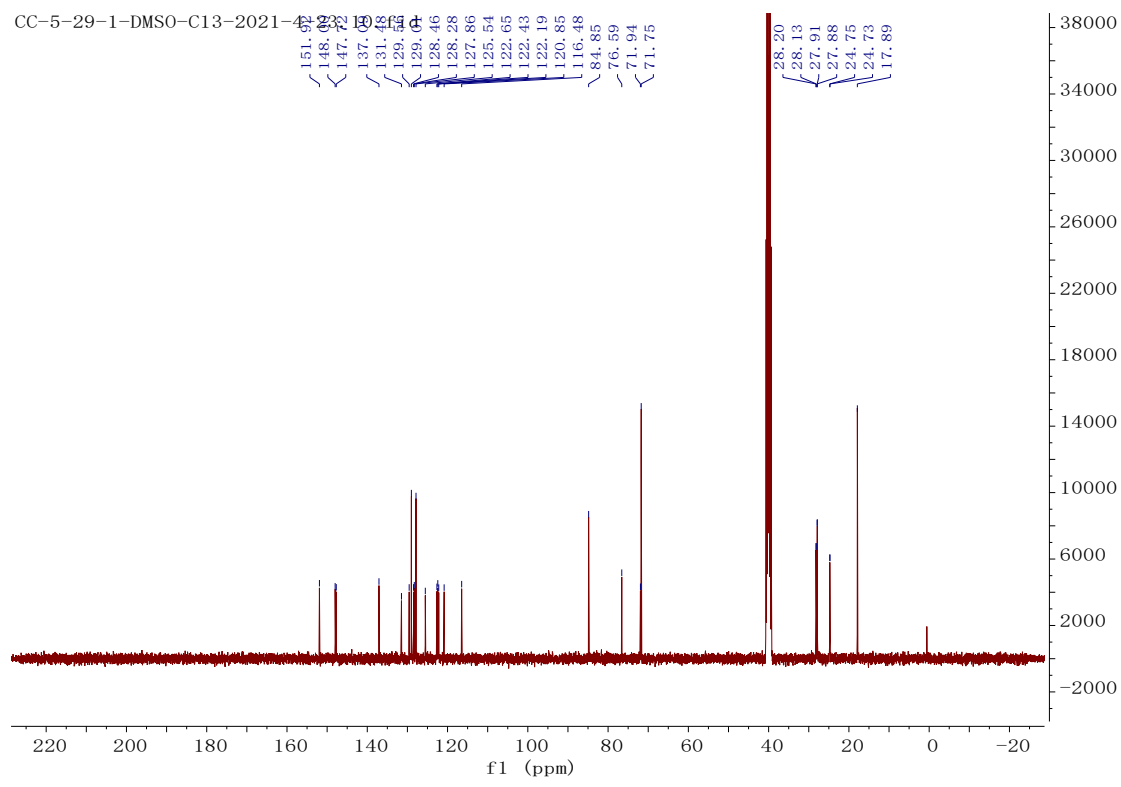

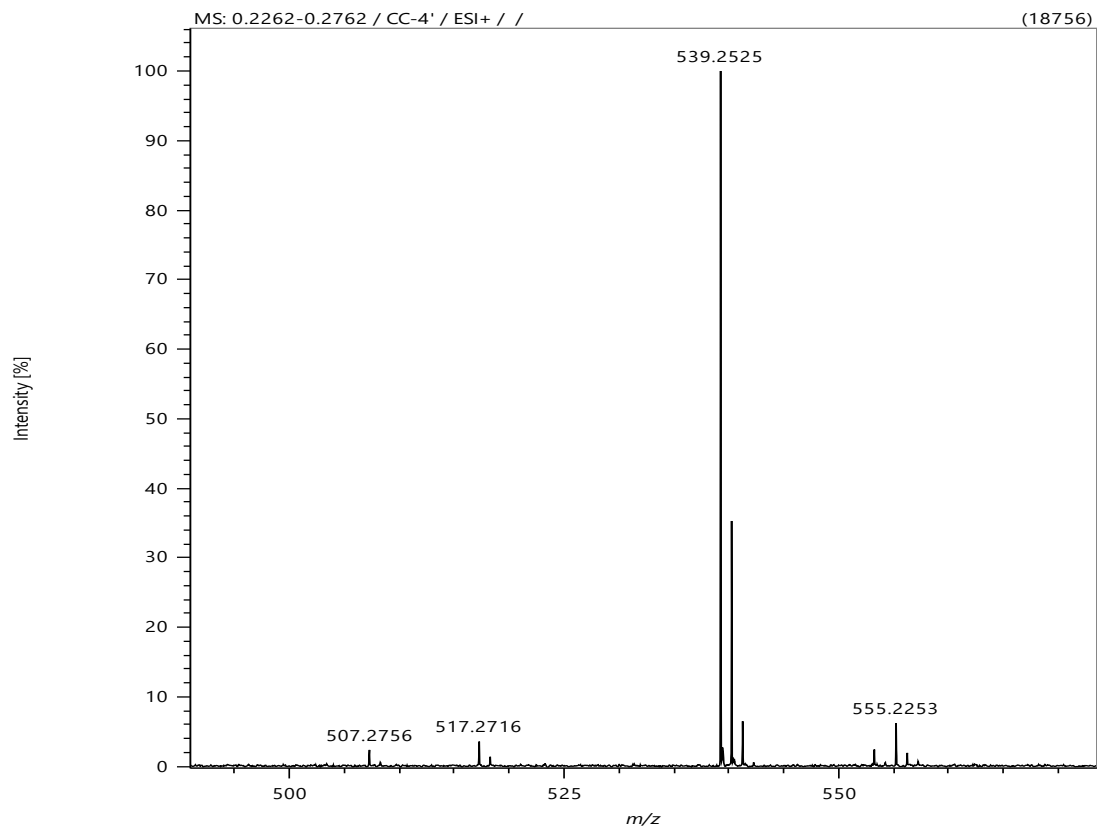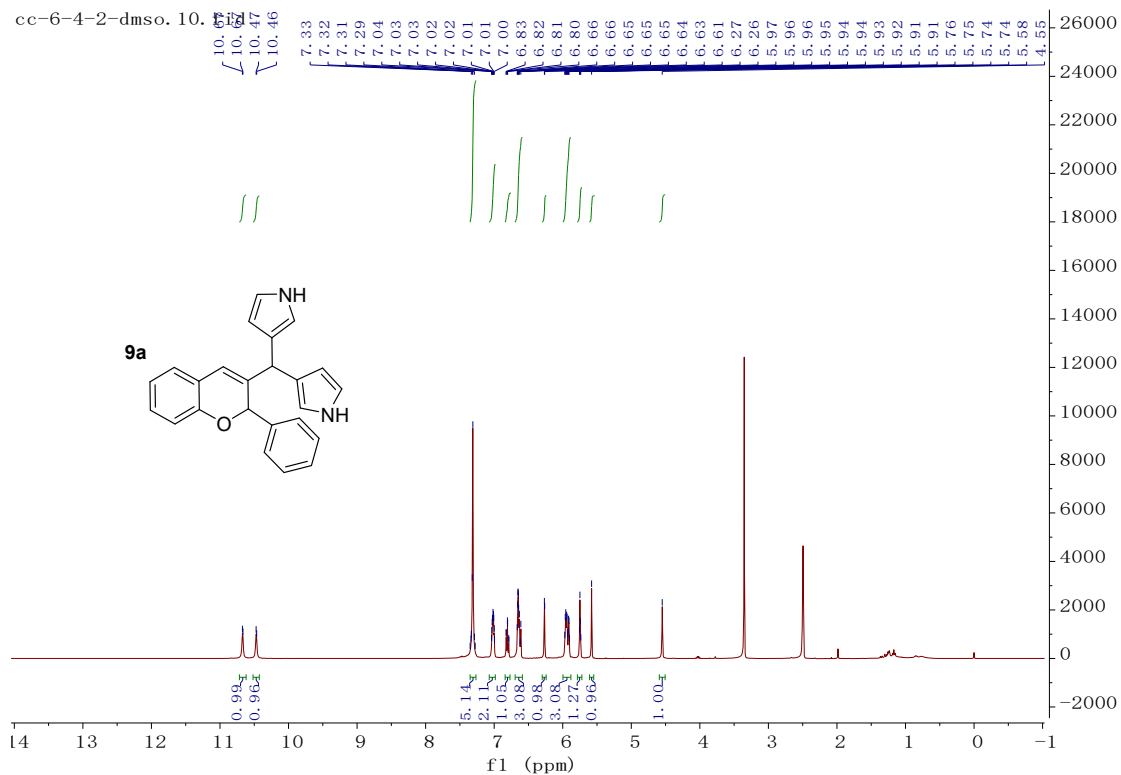

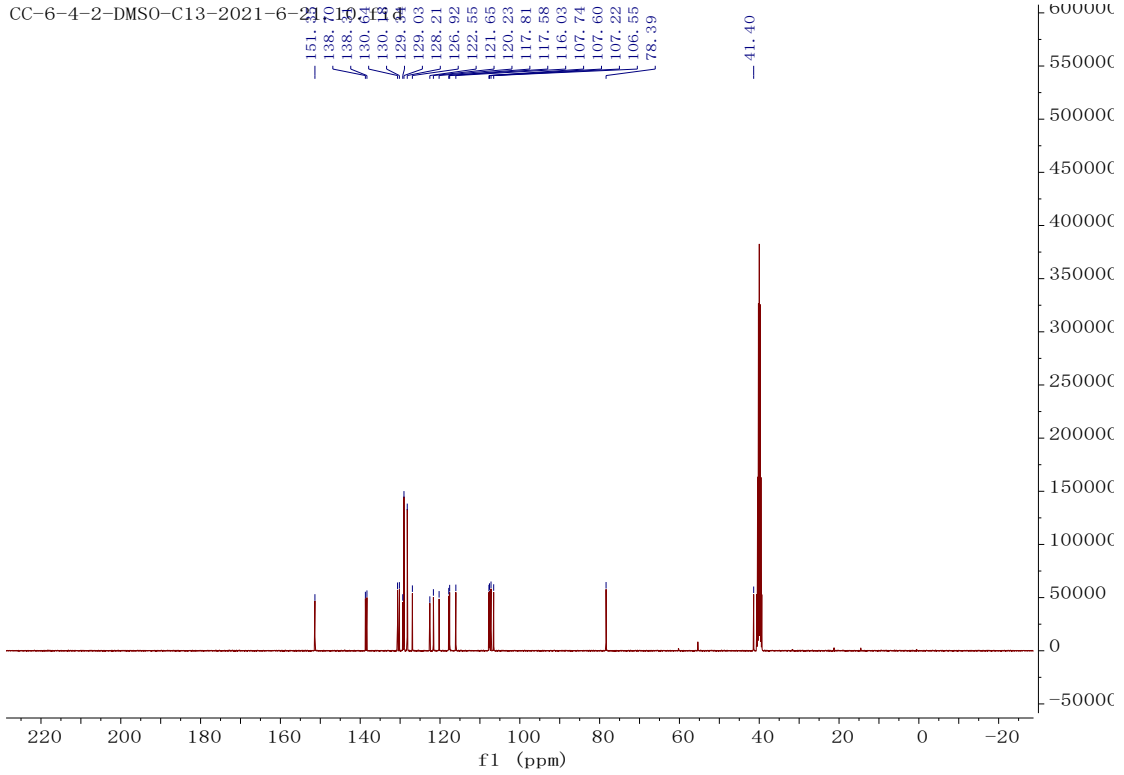

8 #23 RT: 0.3724 AV: 1 NL: 6.09E4  
T: FTMS + p NSI Full ms [50.00-800.00]

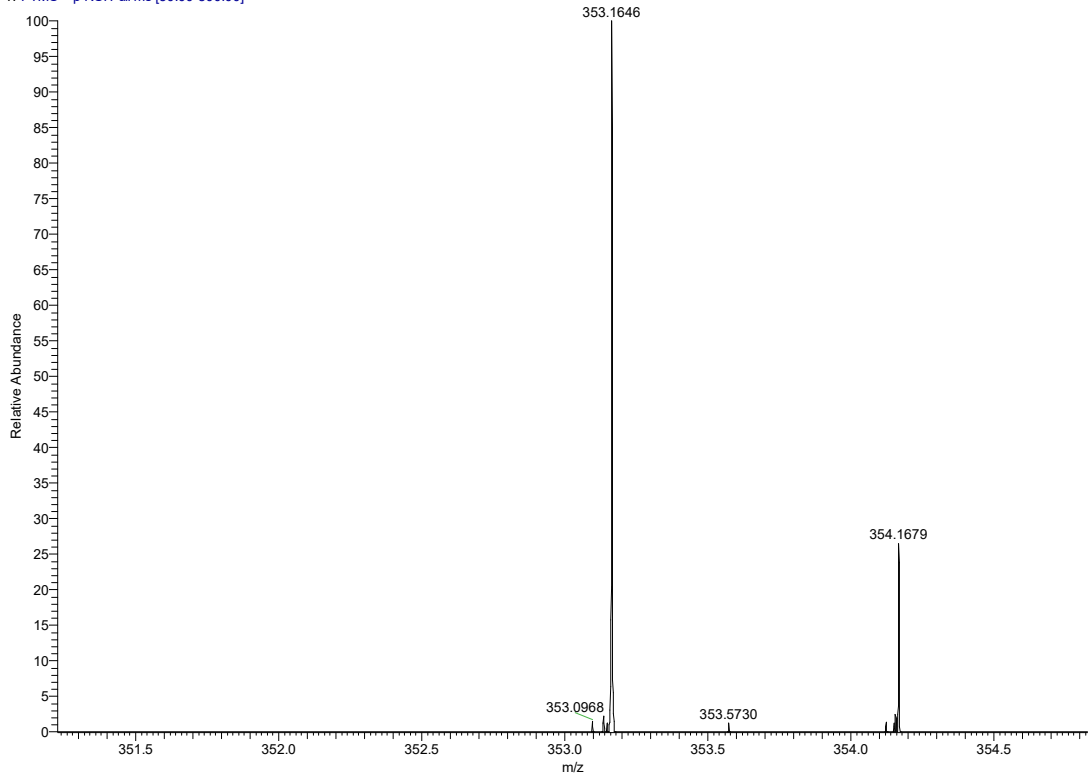

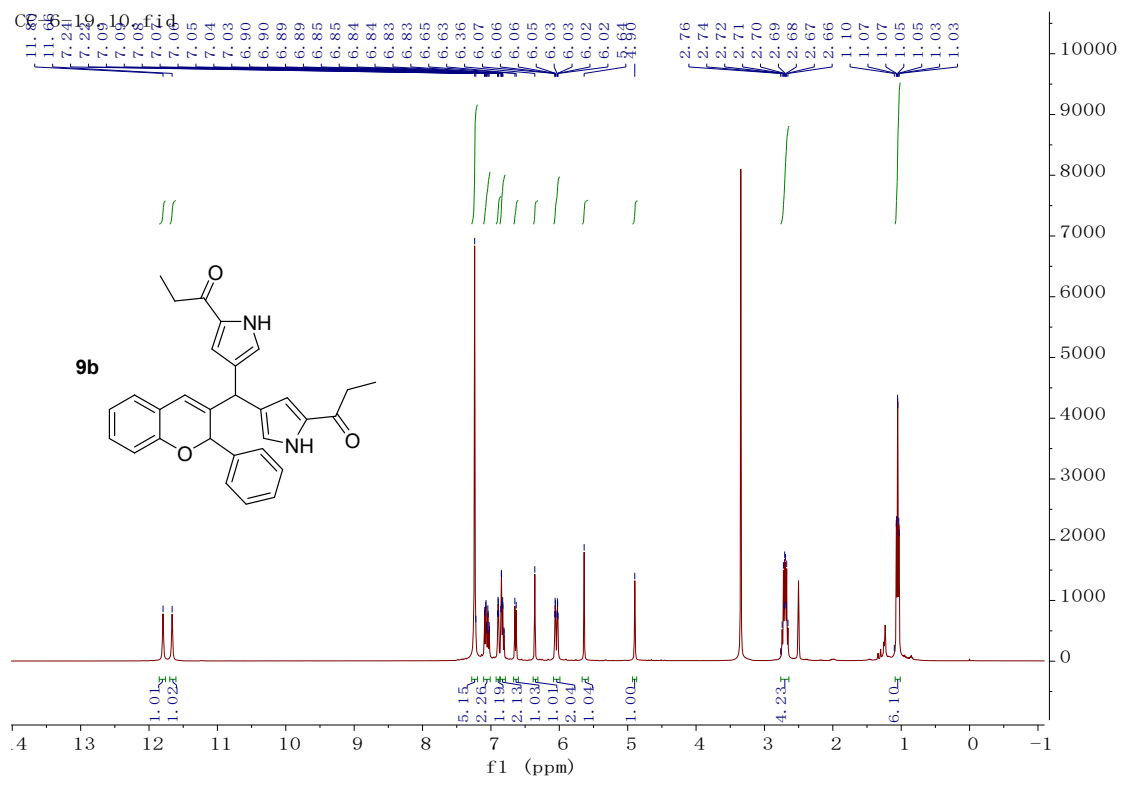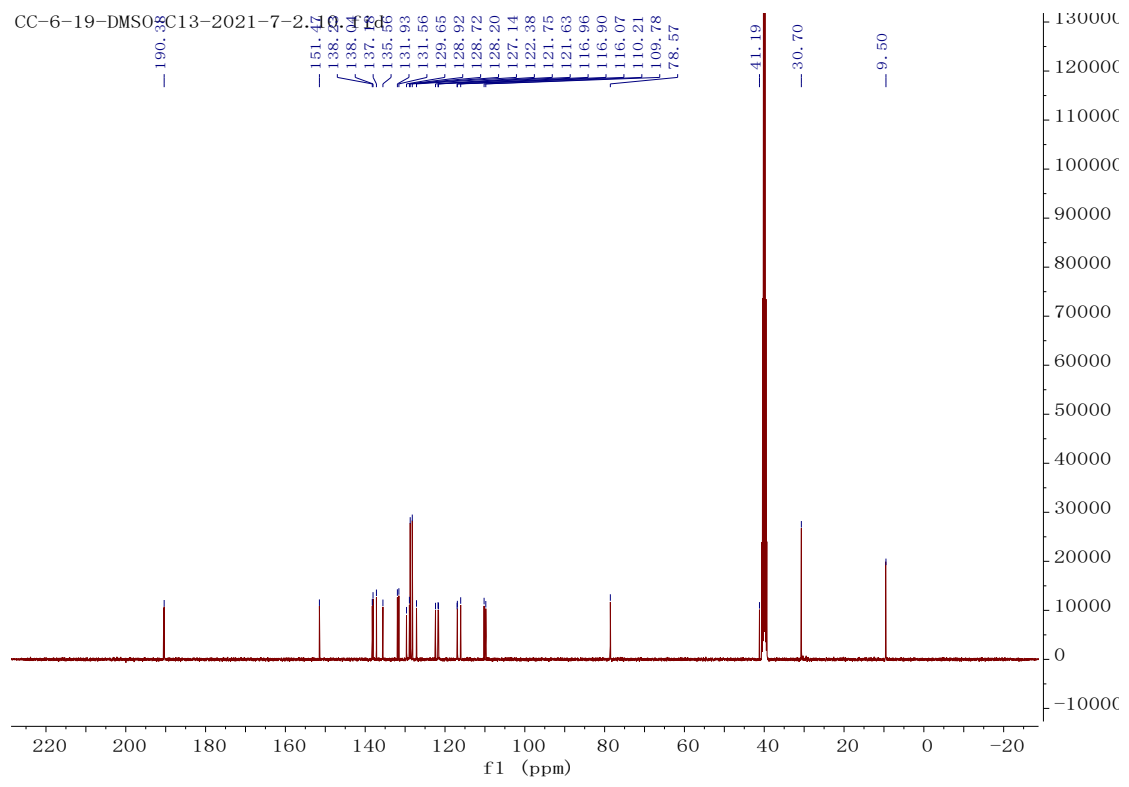

9 #24 RT: 0.3789 AV: 1 NL: 3.35E6  
T: FTMS + p NSI Full ms [50.00-800.00]

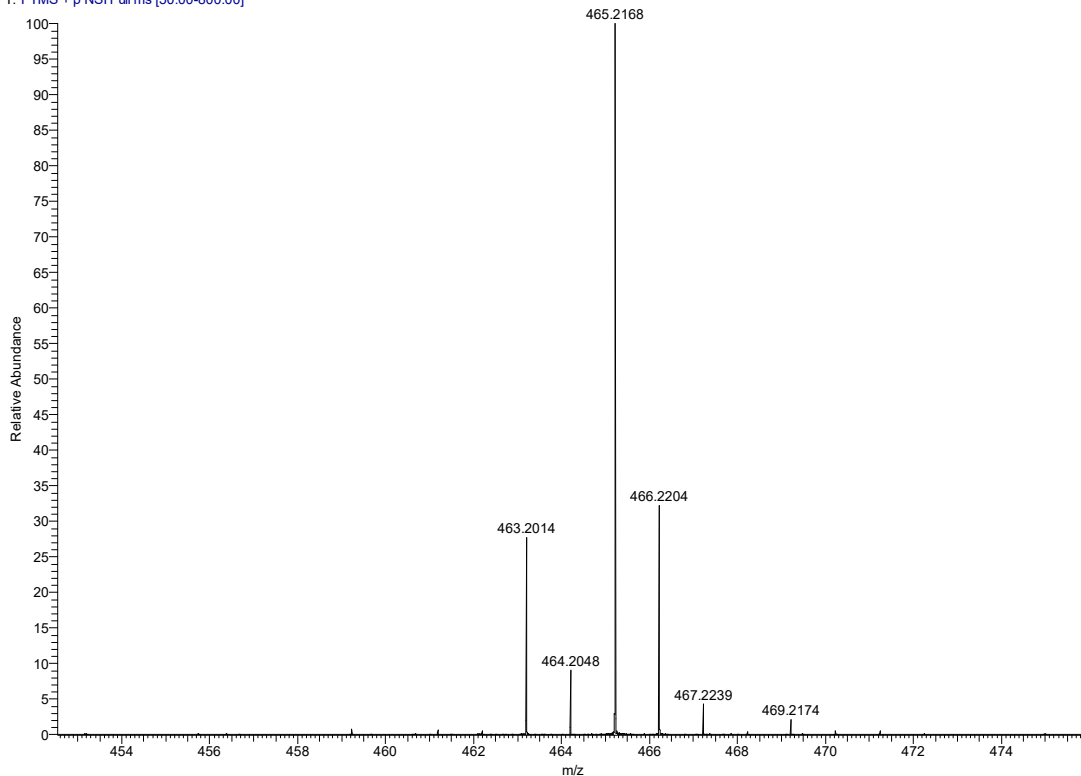

CC-6-10-DMSO. 10. fid

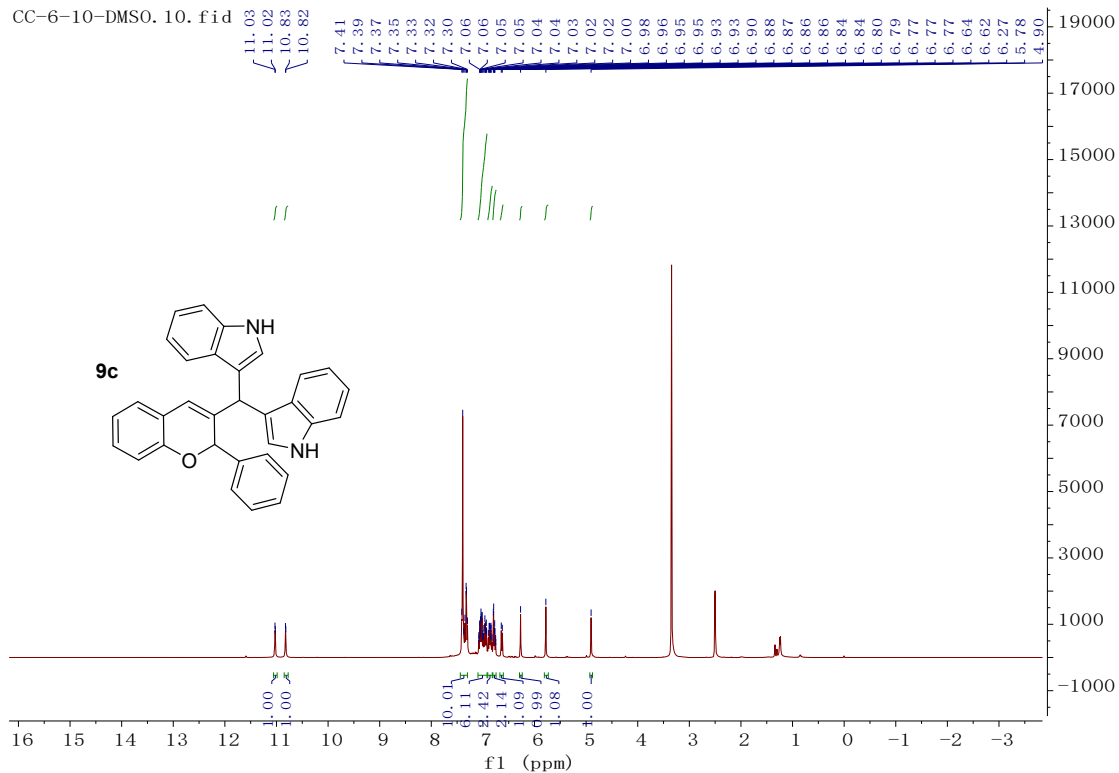

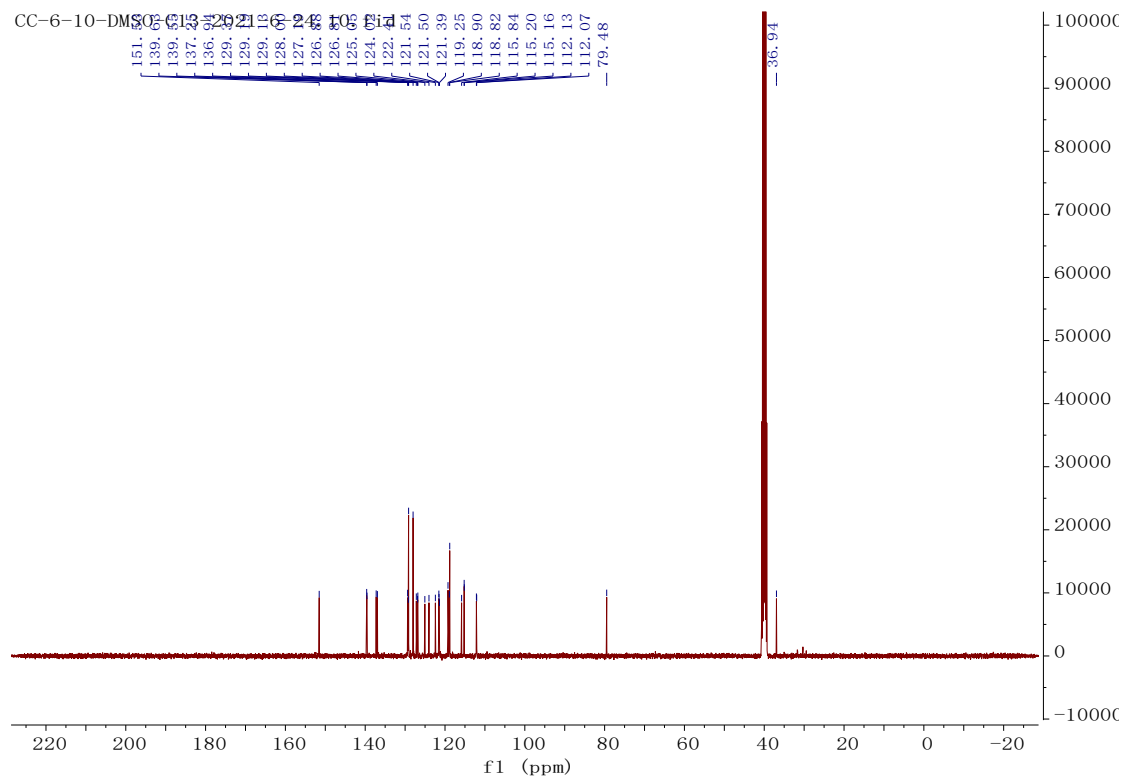

12 #15 RT: 0.2327 AV: 1 NL: 2.25E5  
T: FTMS + p NSI Full ms [50.00-800.00]

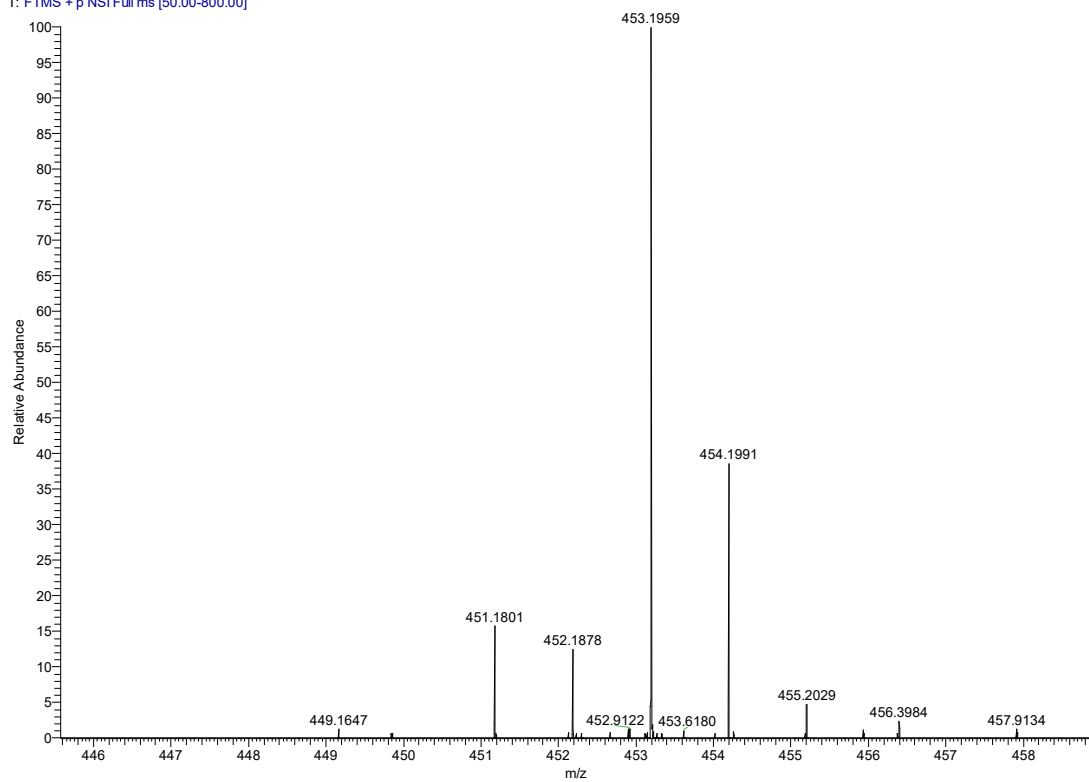

GJ-3-37.10.fid

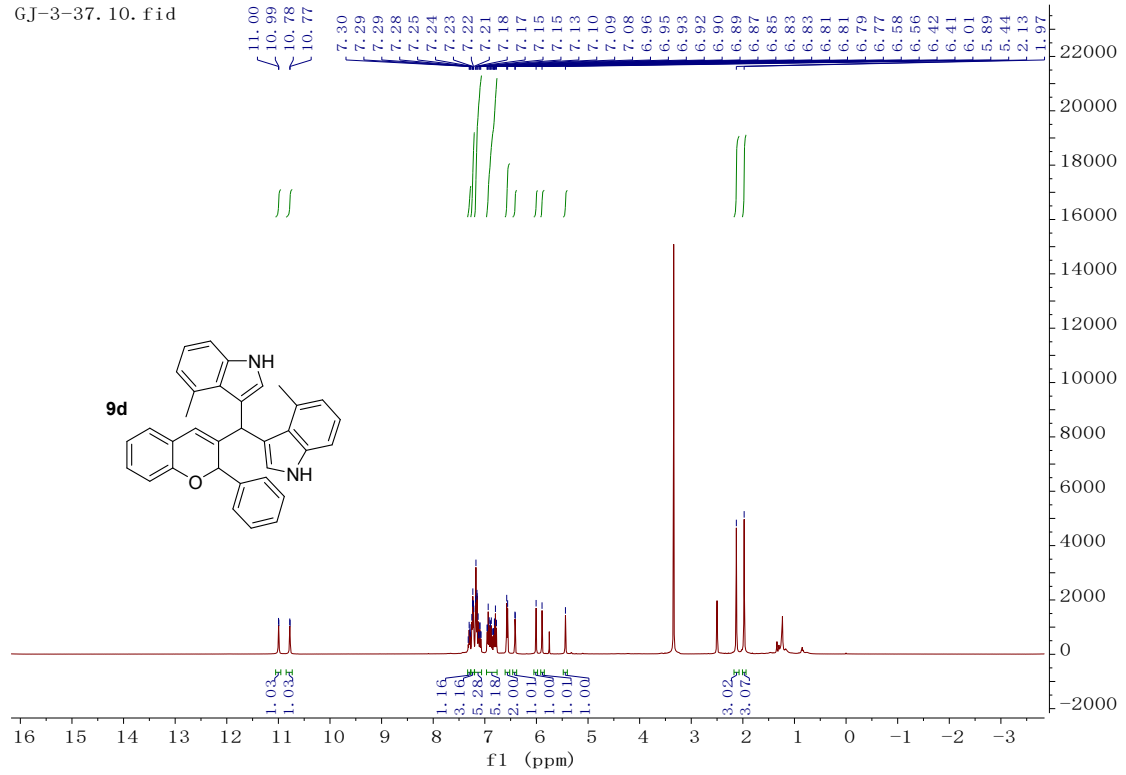

GJ-3-37-DMSO

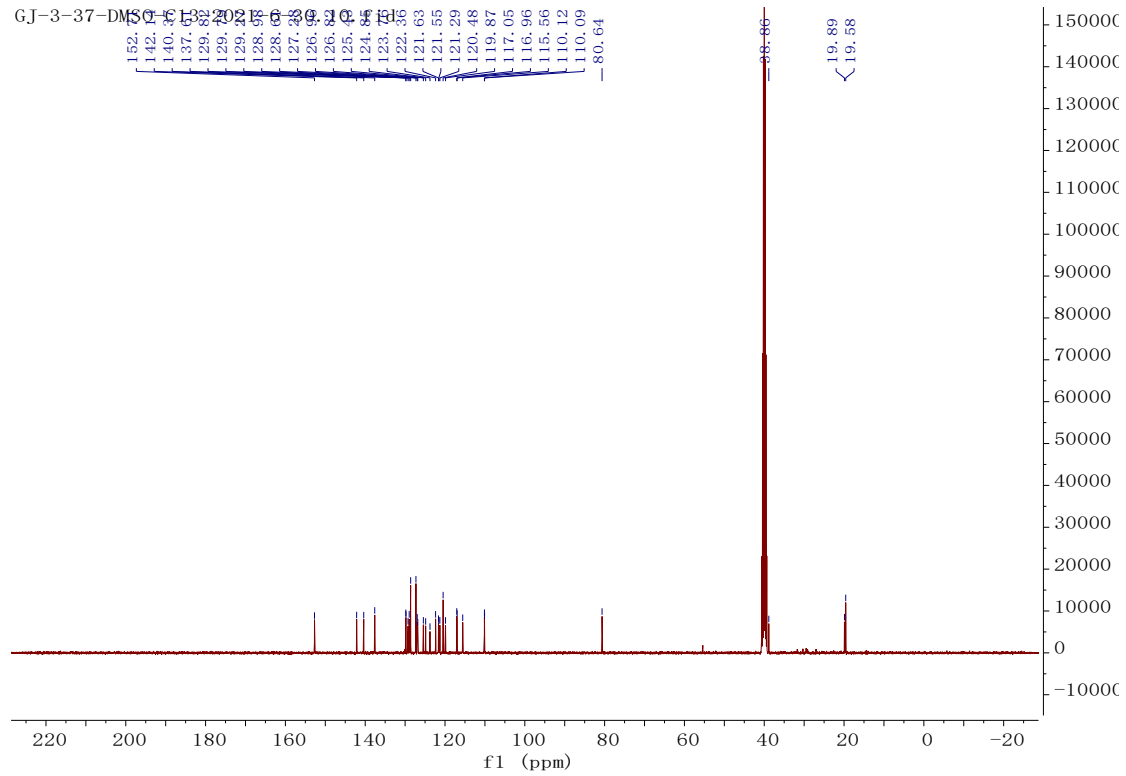

14 #19 RT: 0.3044 AV: 1 NL: 2.37E5  
T: FTMS + p NSI Full ms [50.00-800.00]

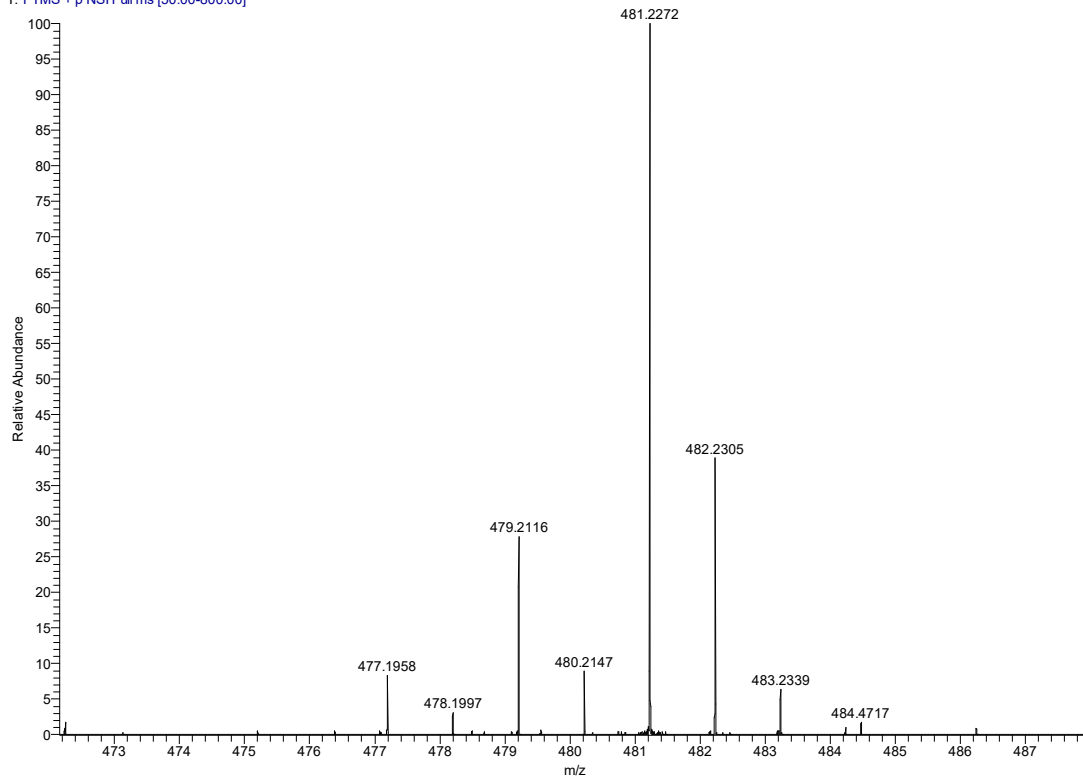

GJ-3-40.10.fid

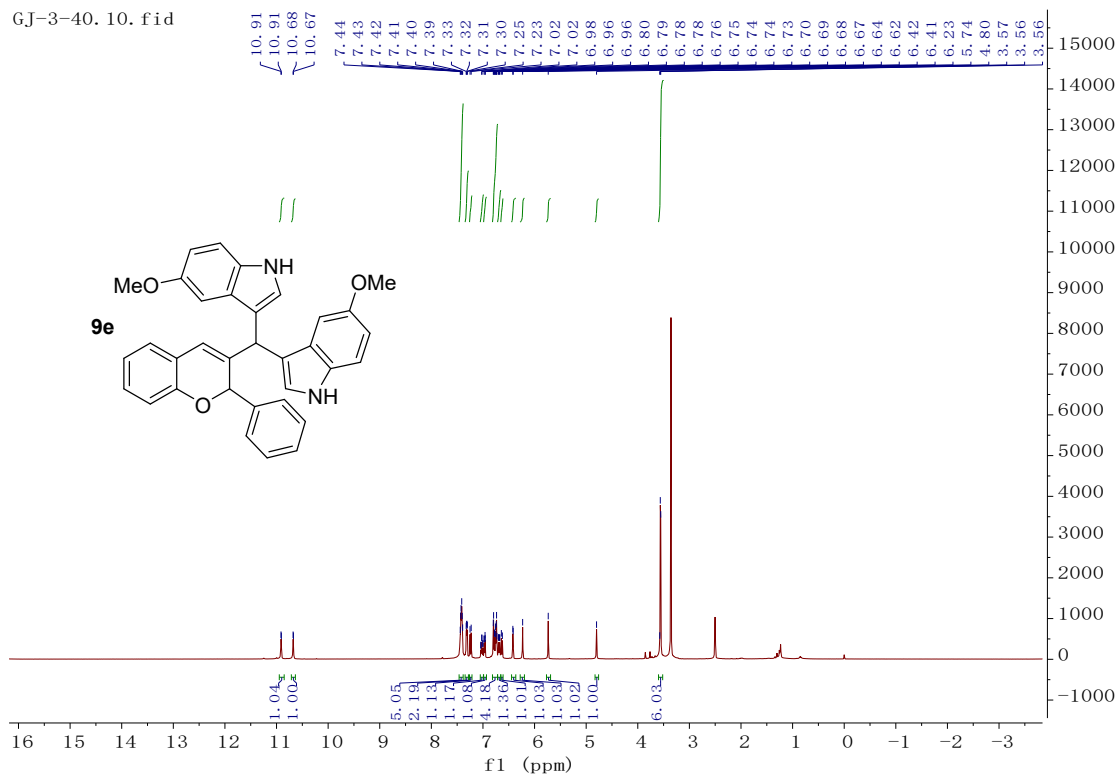



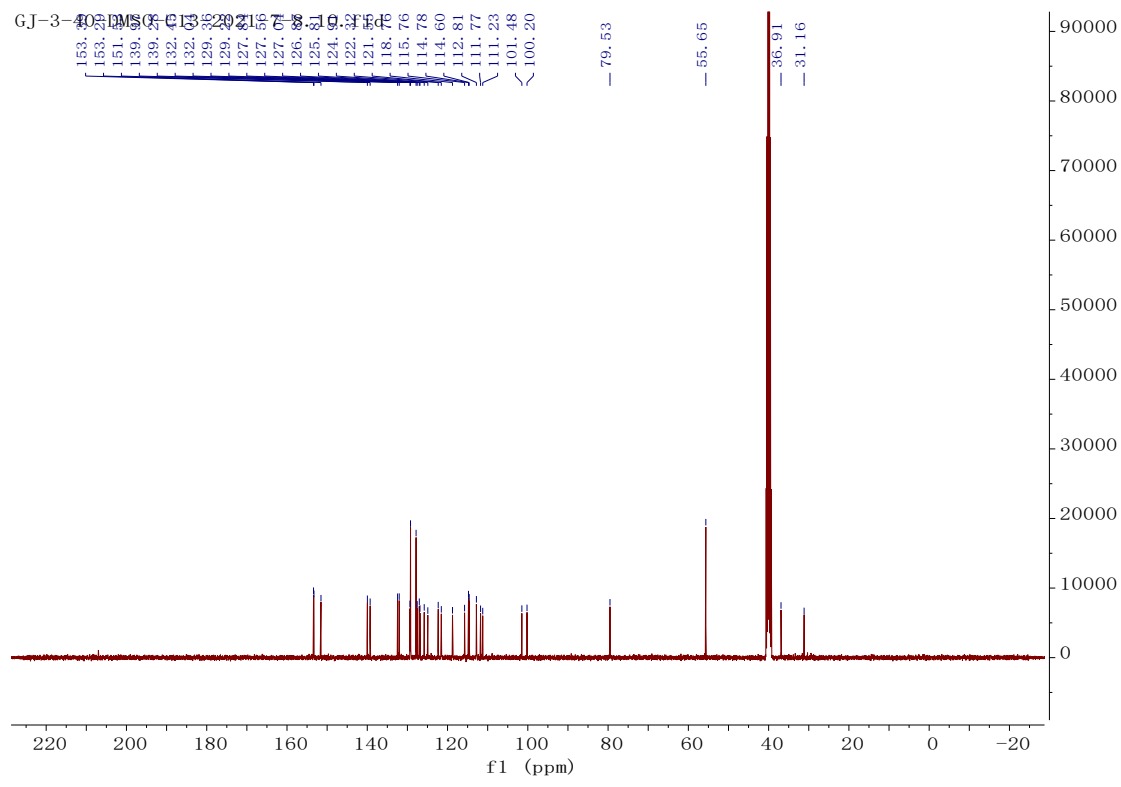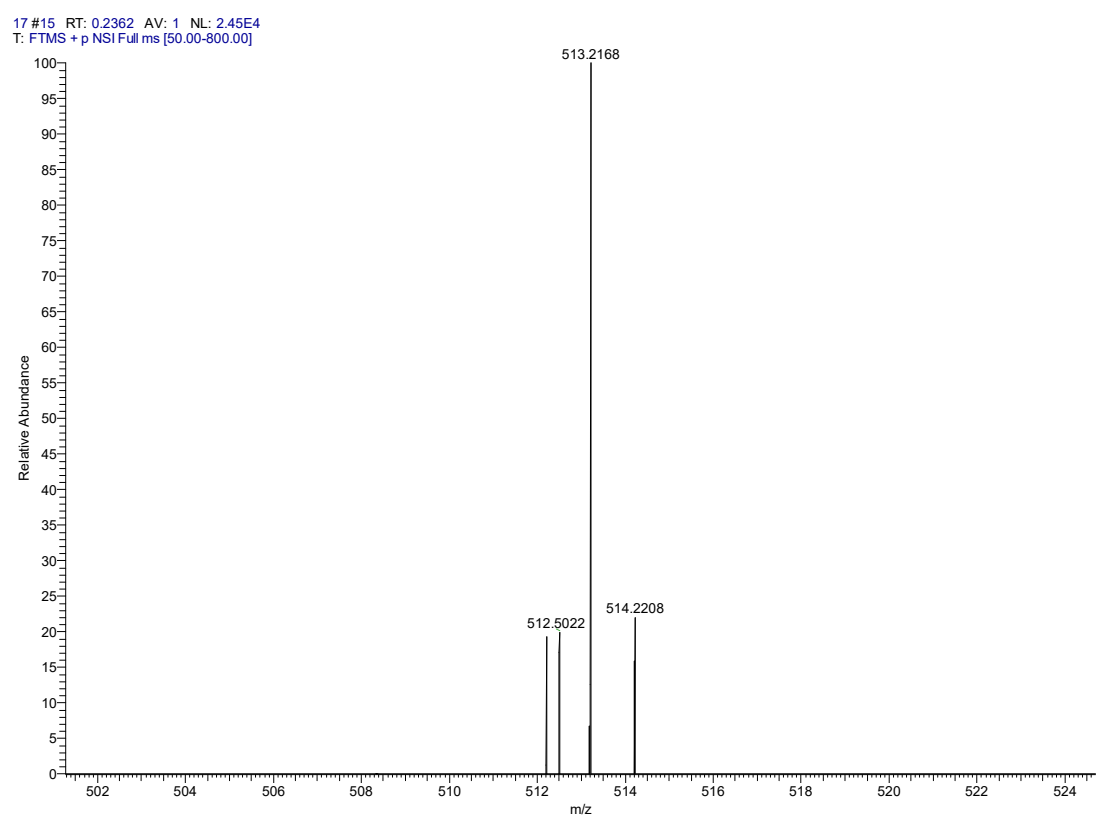

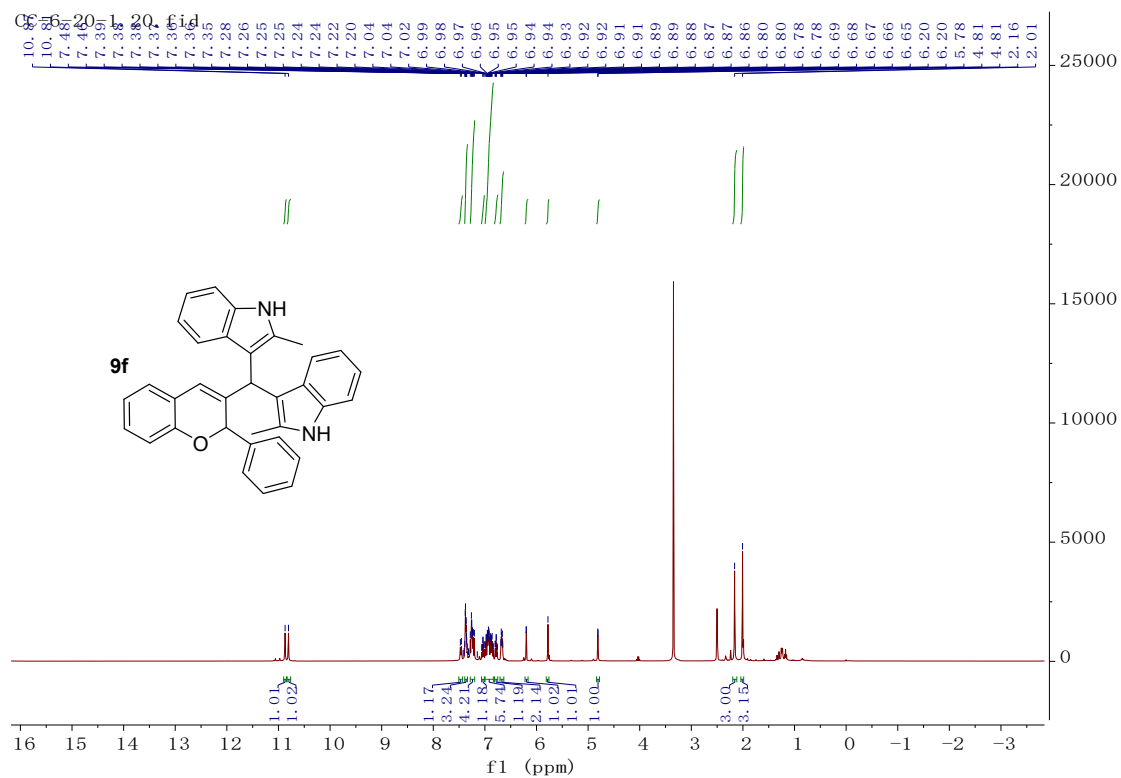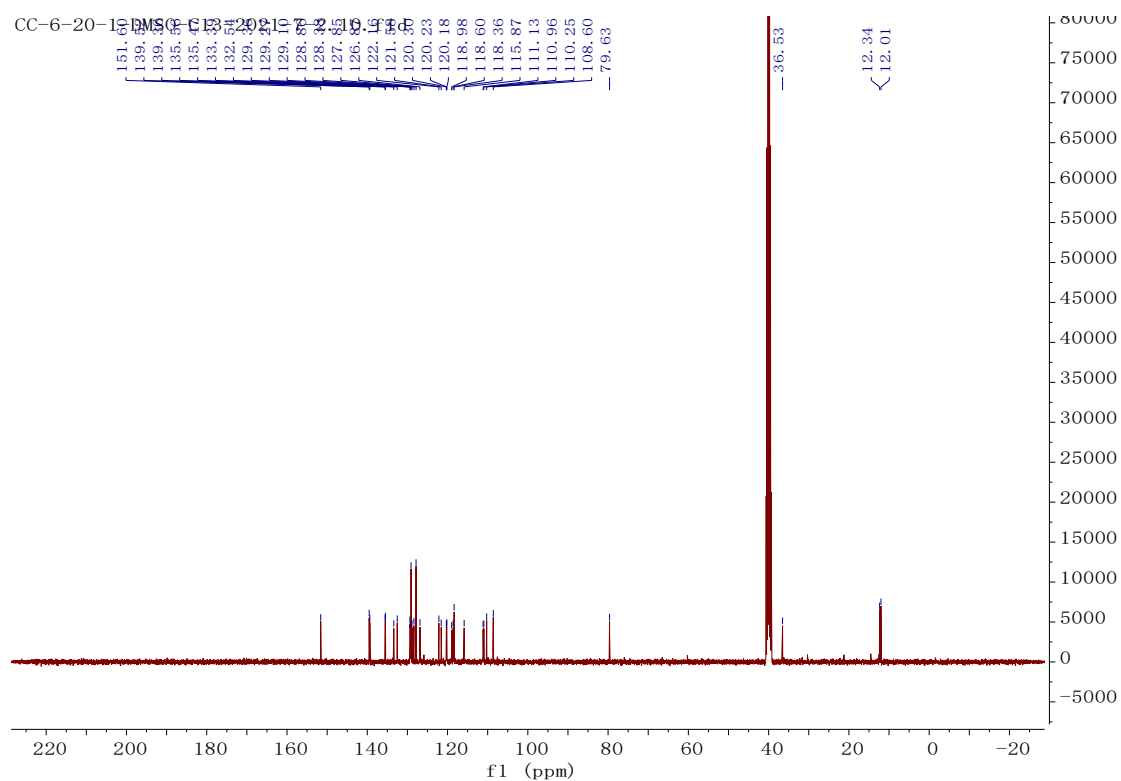

10 #29 RT: 0.4605 AV: 1 NL: 2.11E4  
T: FTMS + p NSI Full ms [50.00-800.00]

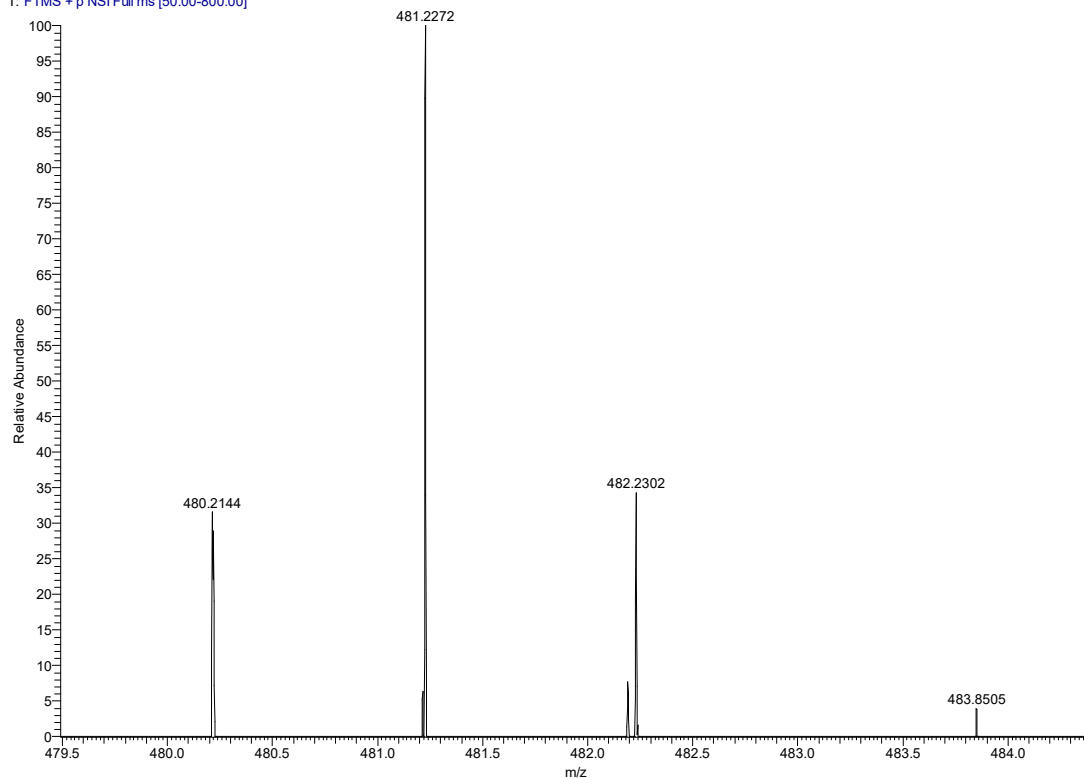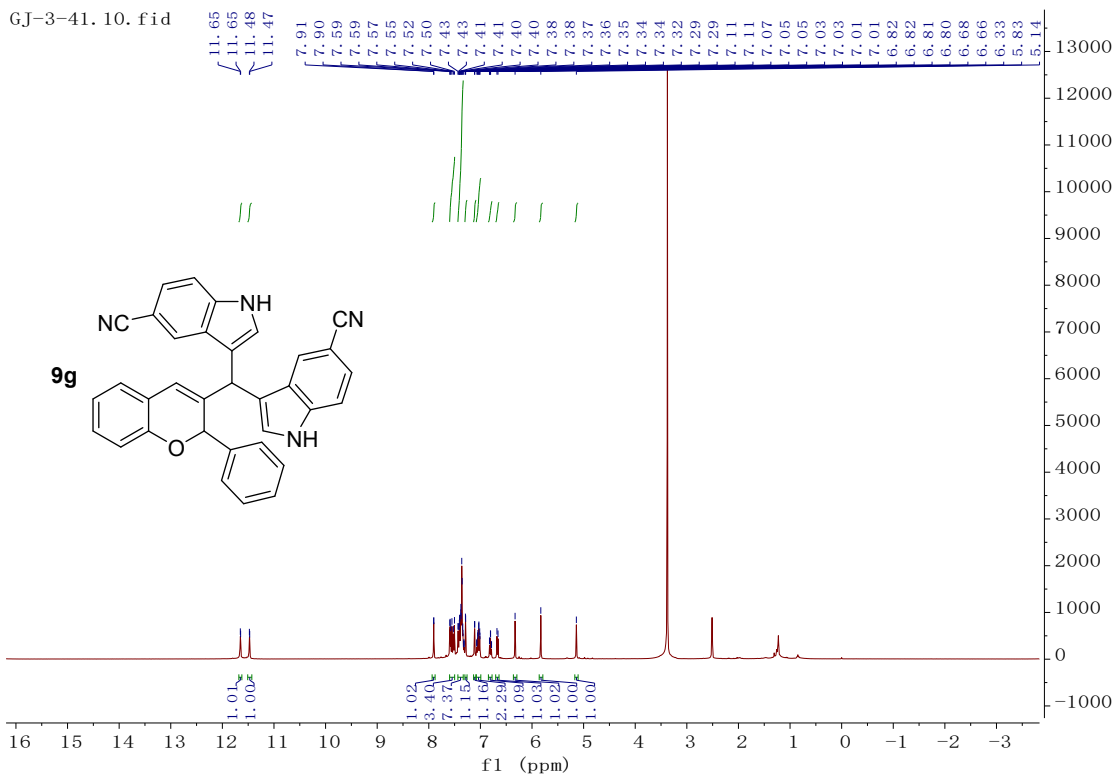

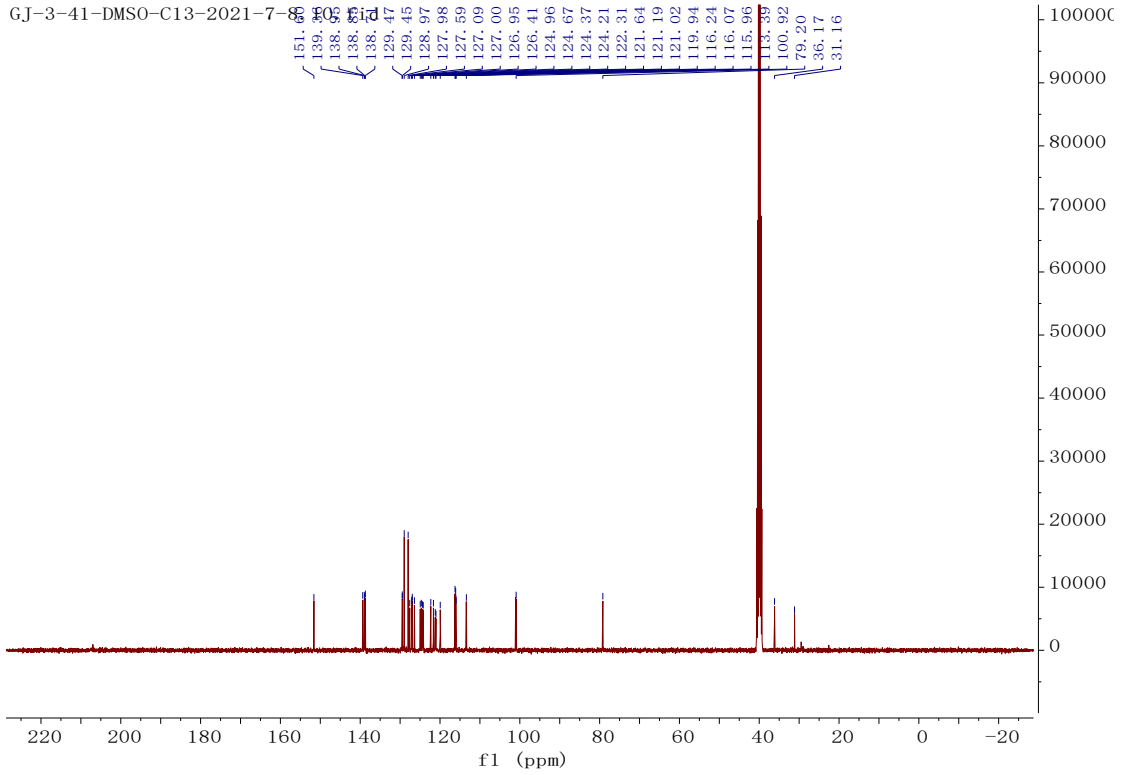

CC-42\_20210826155706 #19 RT: 0.08 AV: 1 NL: 2.79E7  
T: FTMS + p ESI Full ms [100.0000-1000.0000]

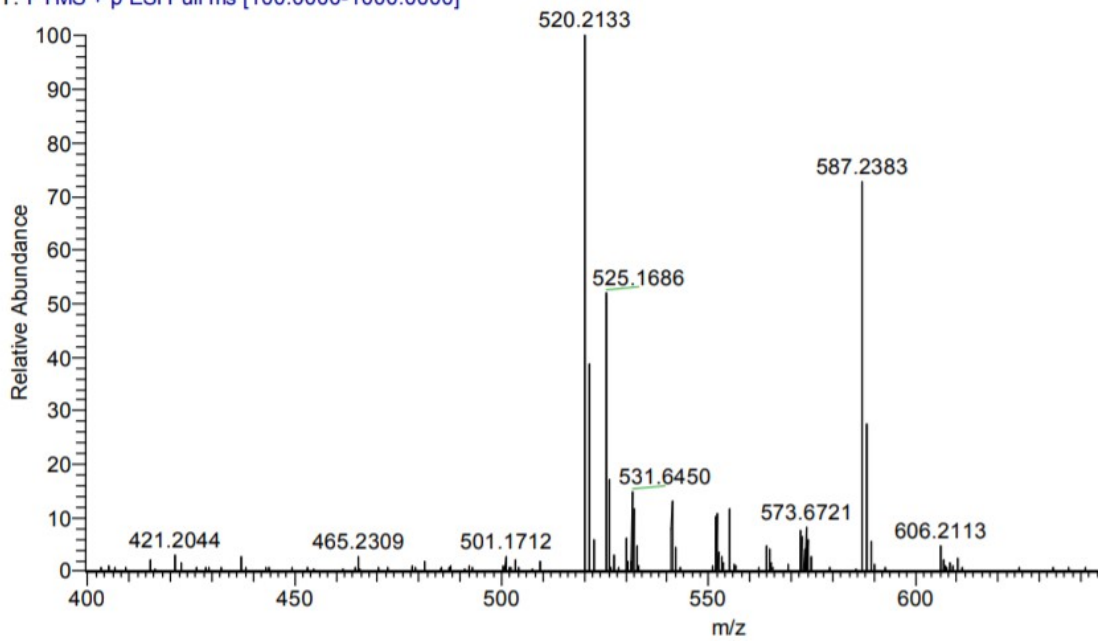

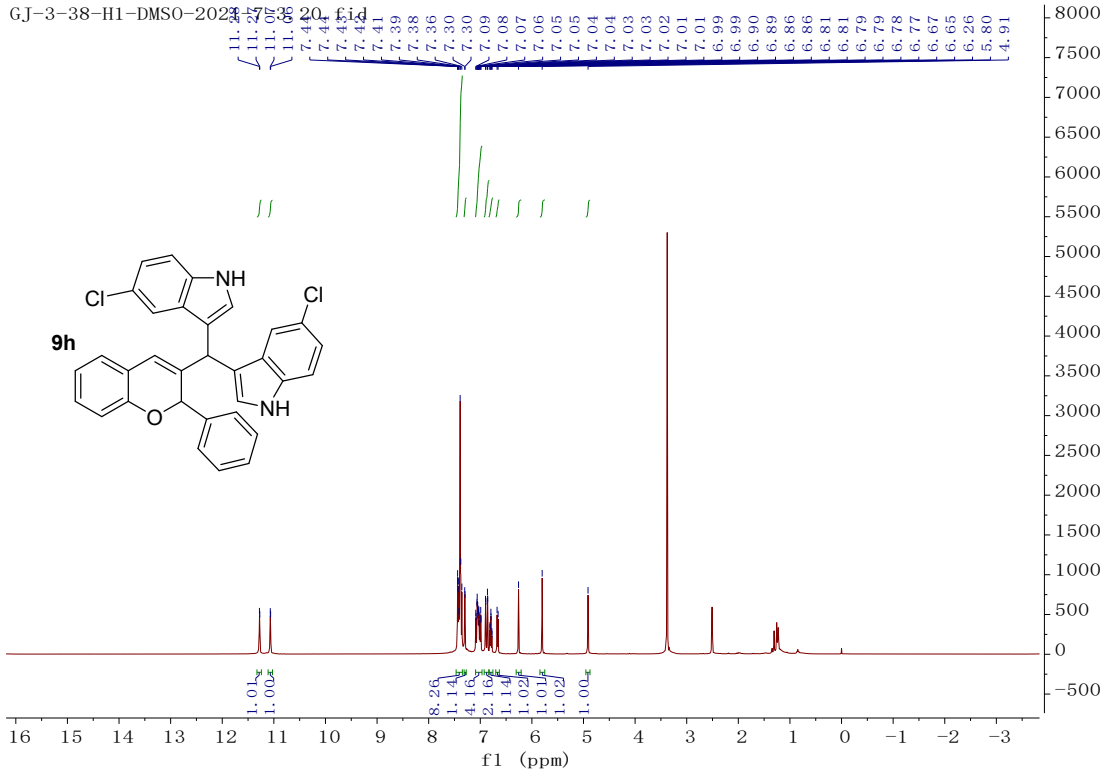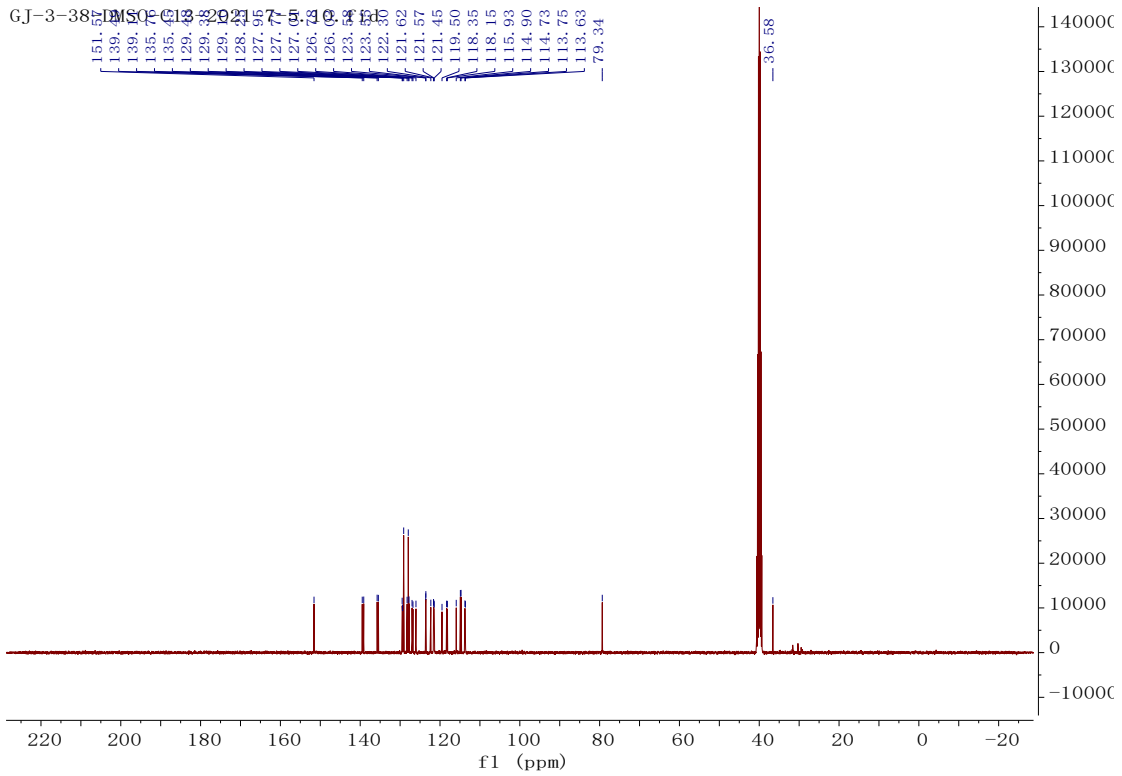

7\_21081113046 #18 RT: 0.2808 AV: 1 NL: 5.97E5  
 T: FTMS + p NSI Full ms [50.00-800.00]

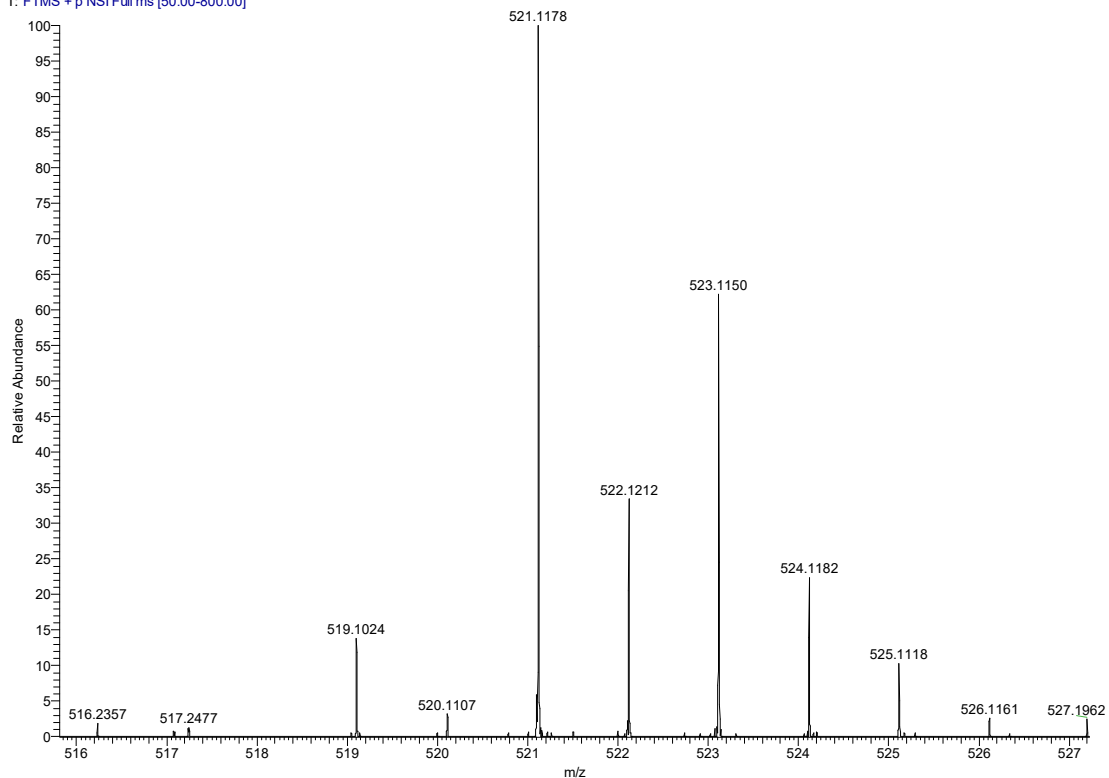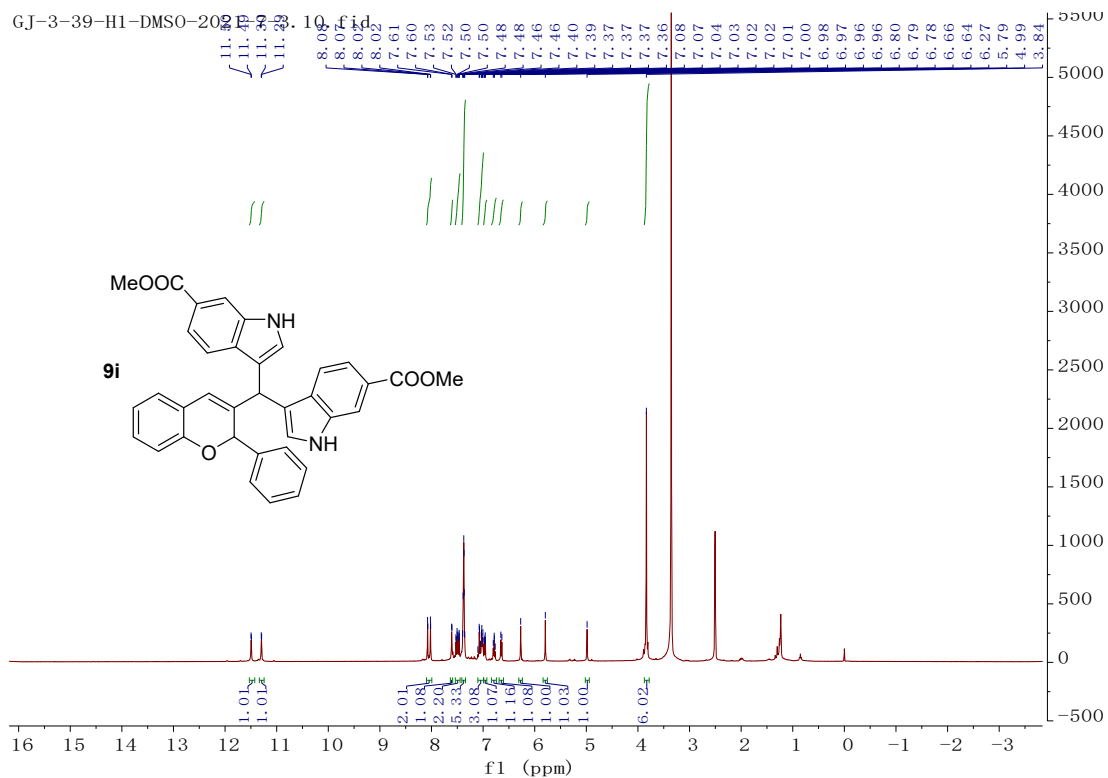

GJ-3-39-DMSO-C13-2021

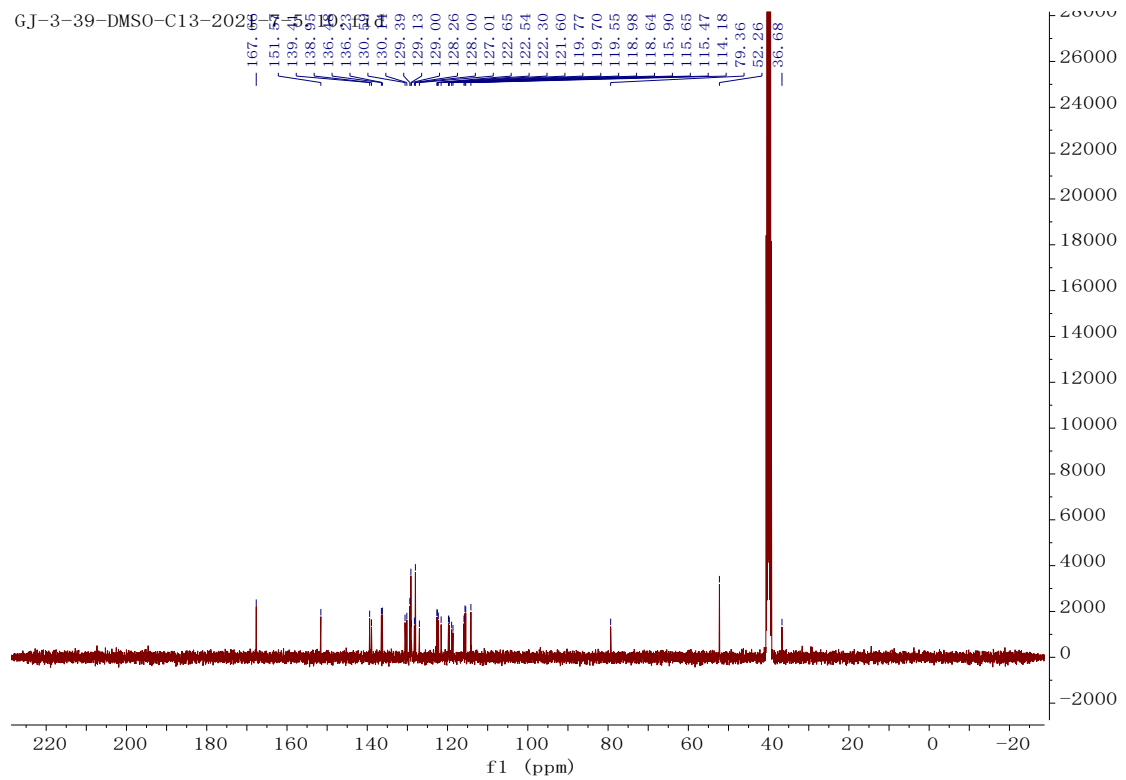

CC-32\_20210826155048 #27 RT: 0.12 AV: 1 NL: 4.81E6  
T: FTMS + p ESI Full ms [100.0000-1000.0000]

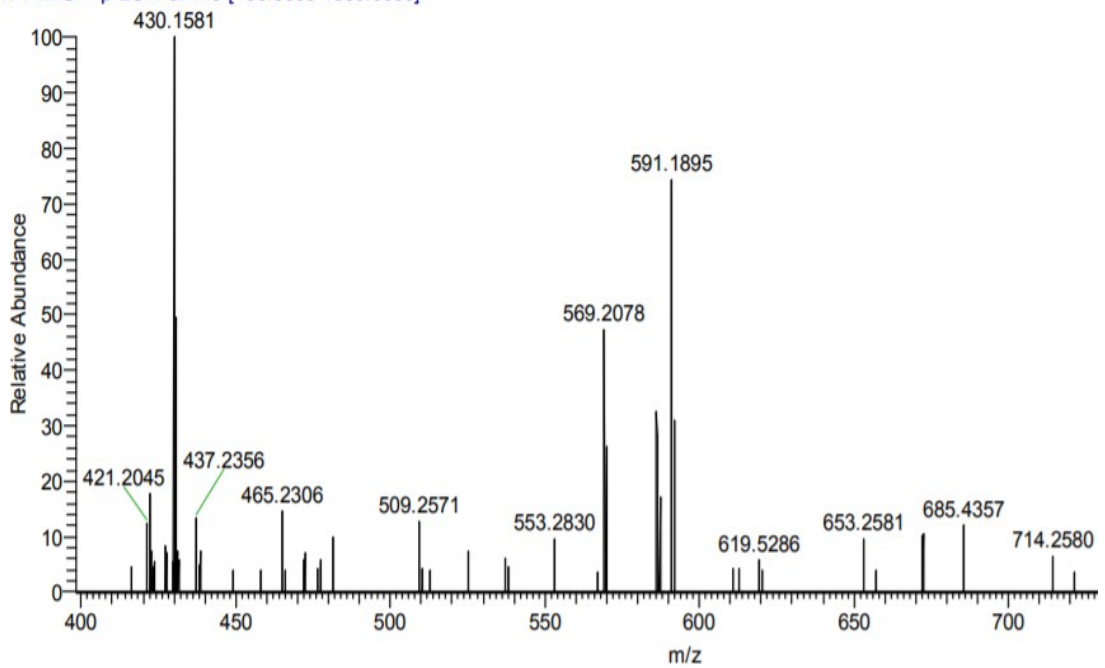

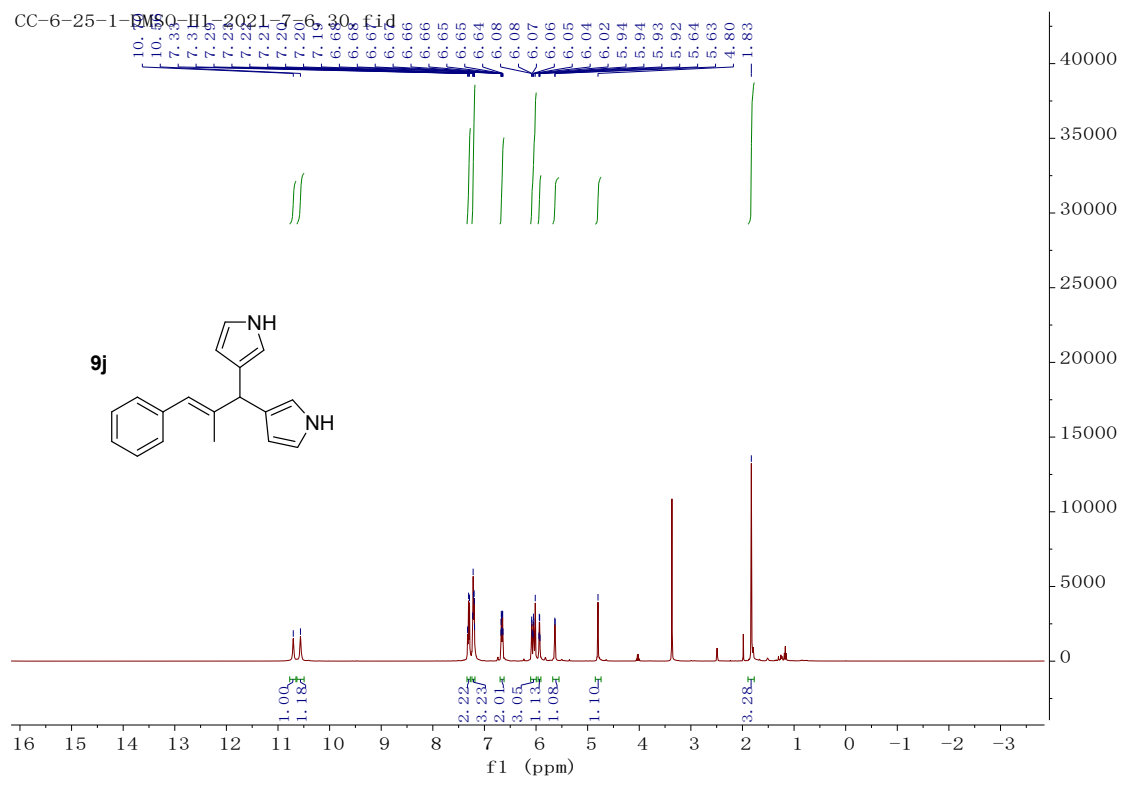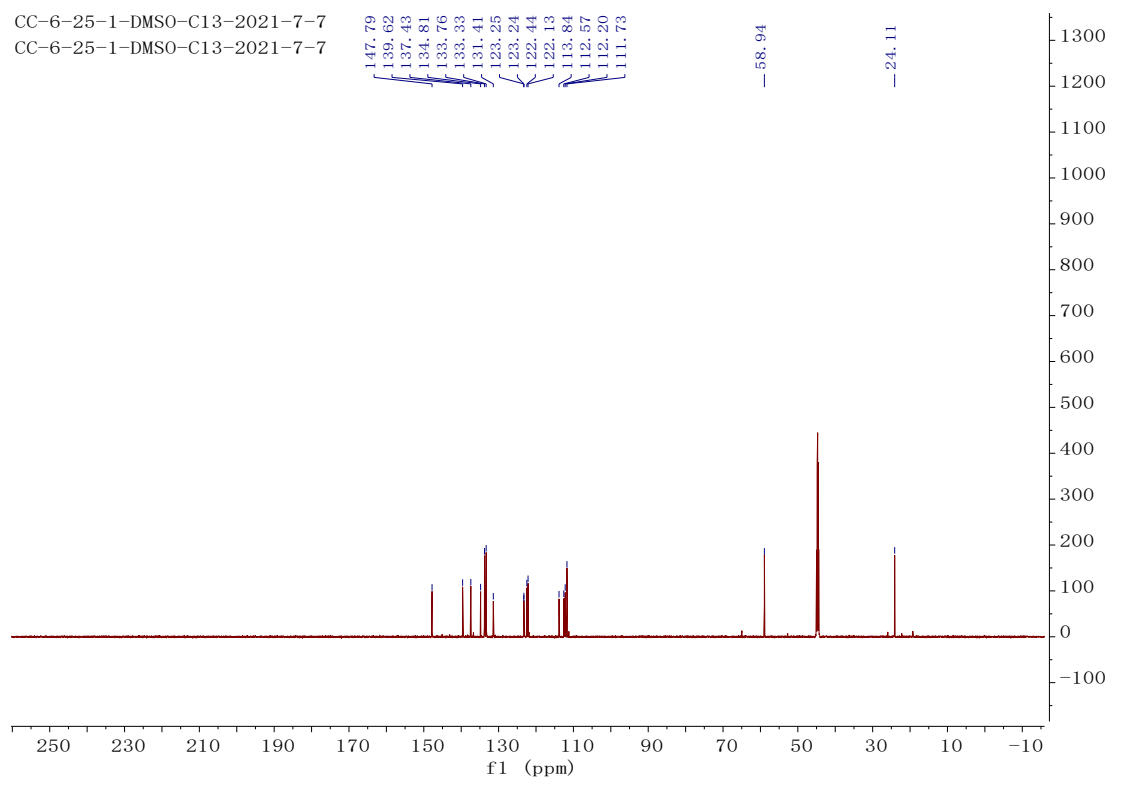



16 #22 RT: 0.3465 AV: 1 NL: 1.36E6  
T: FTMS + p NSI Full ms [50.00-800.00]

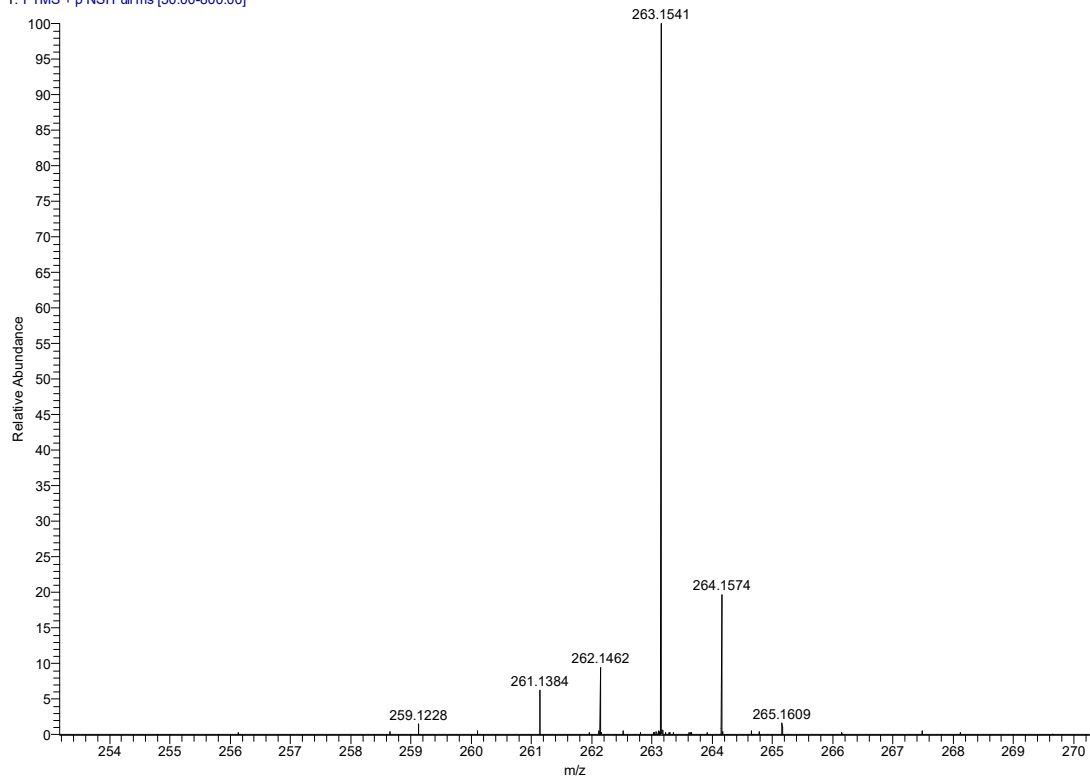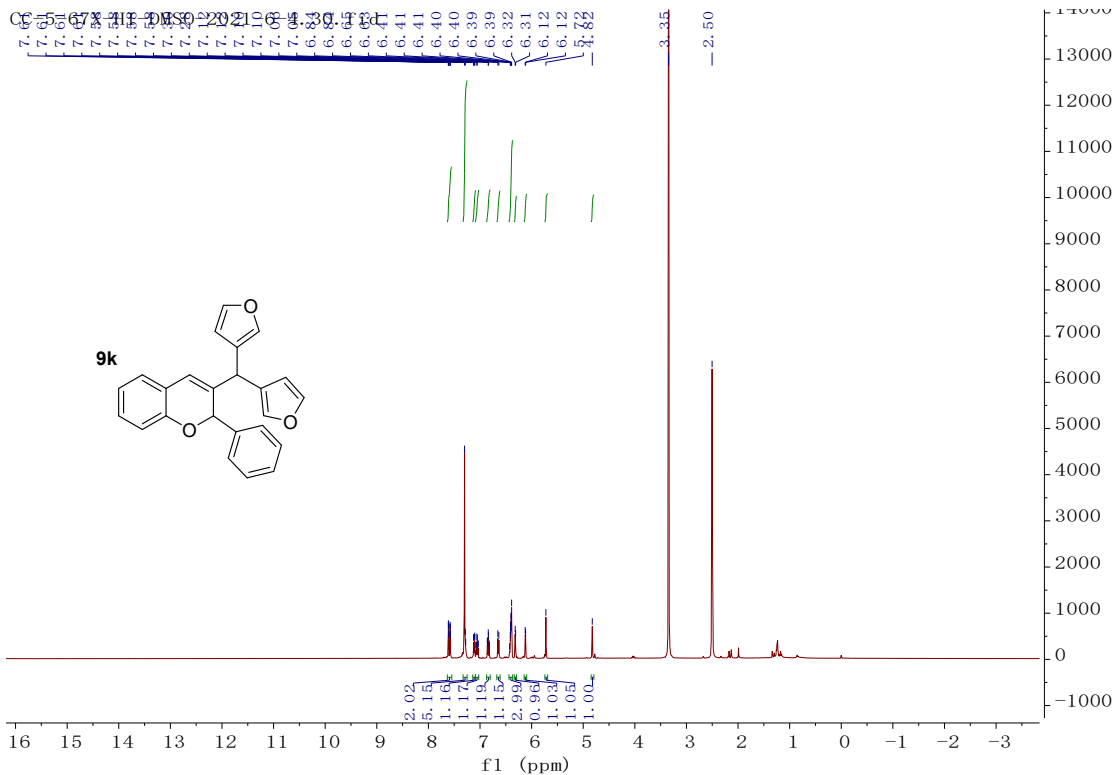

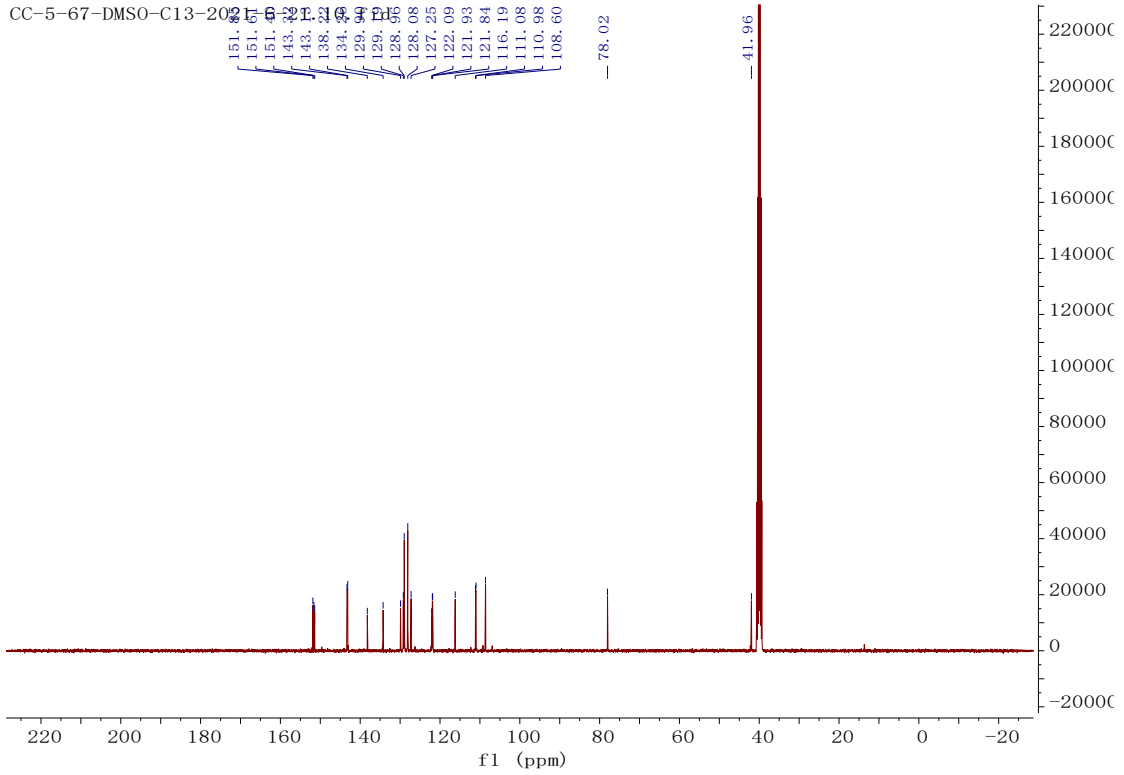

11 #60 RT: 0.9725 AV: 1 NL: 3.08E4  
T: FTMS + p NSI Full ms [50.00-800.00]

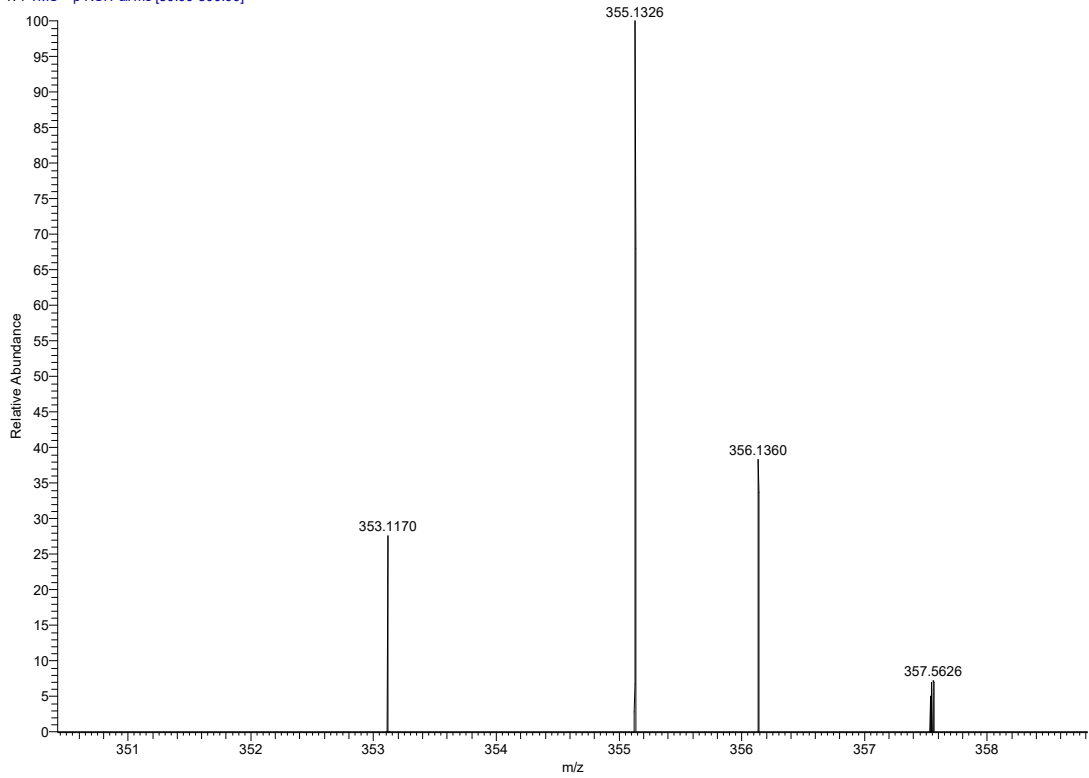

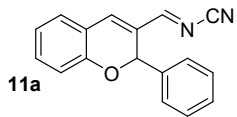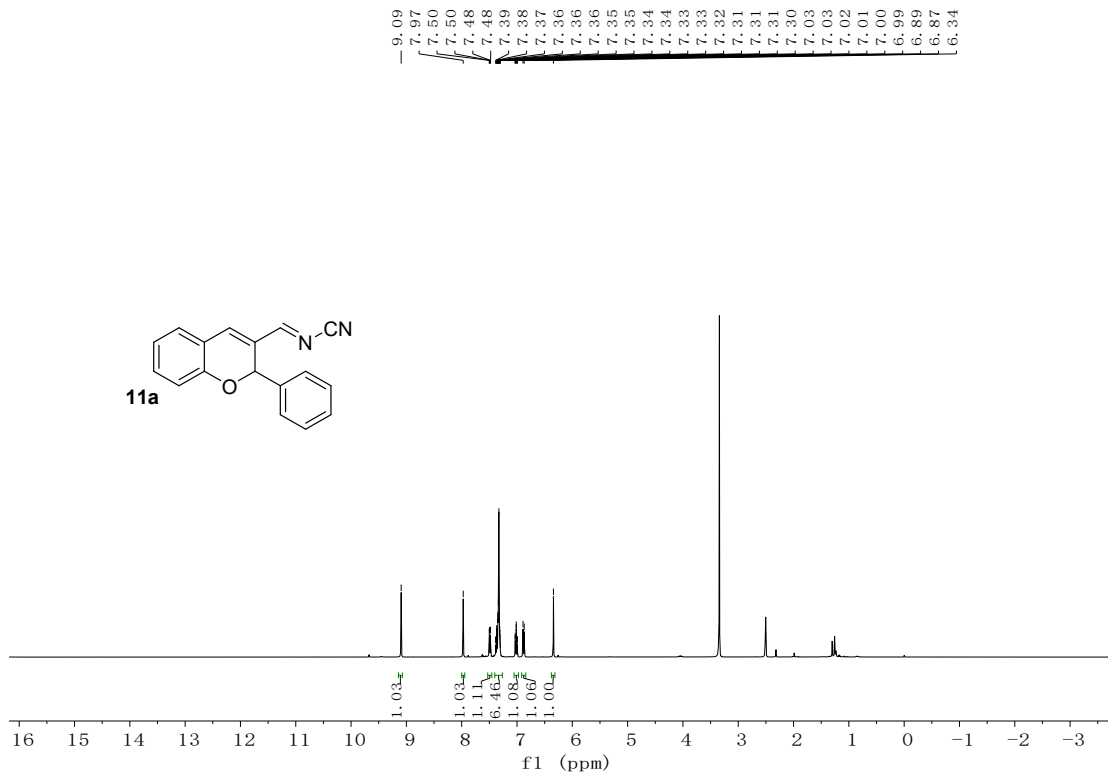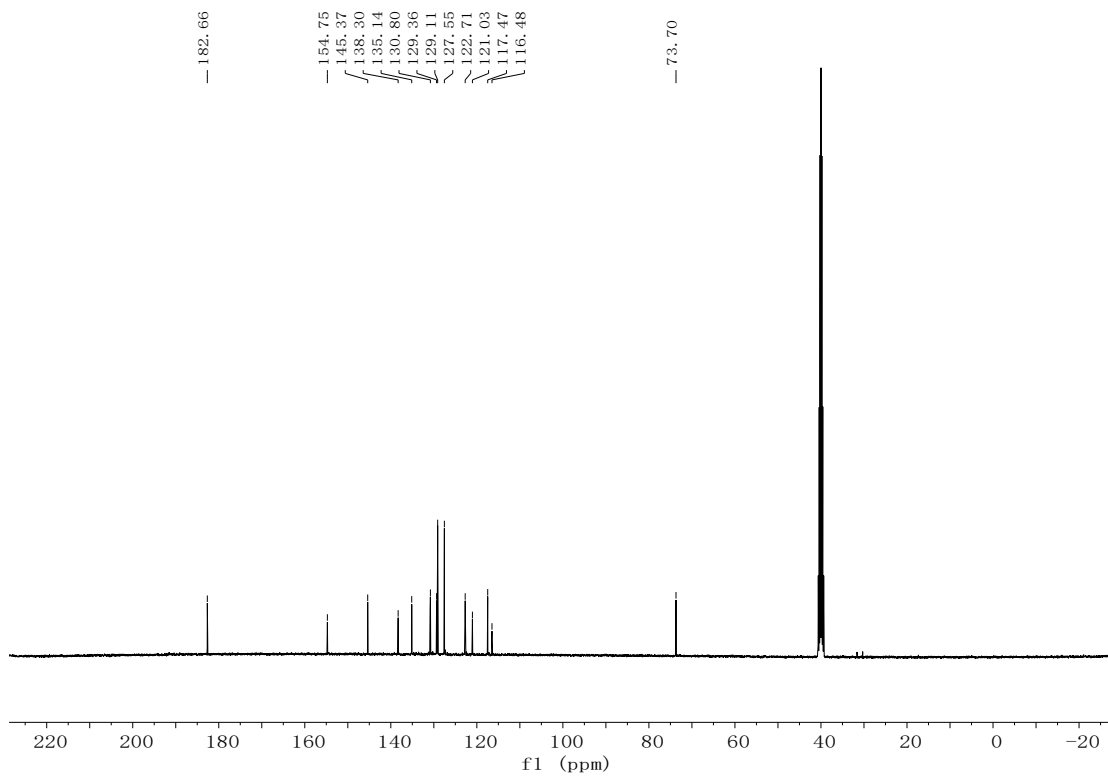

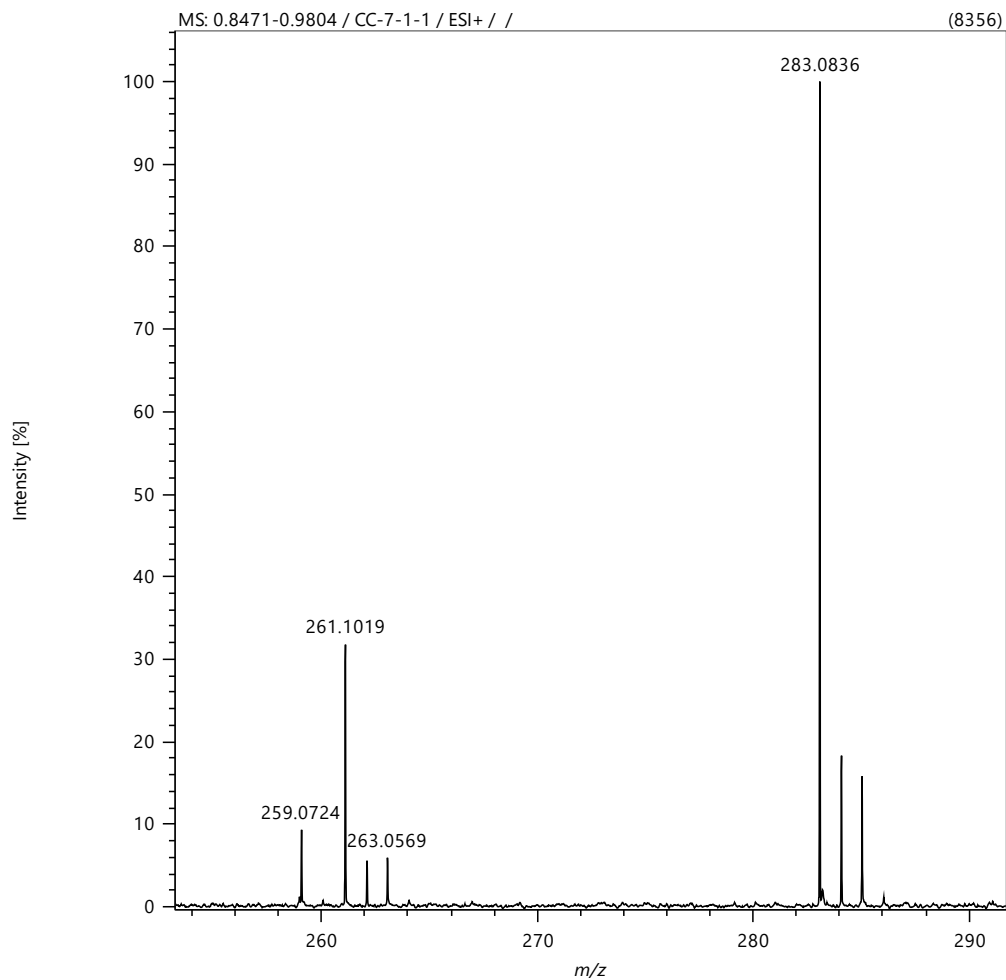

8.83  
8.07  
7.43  
7.42  
7.41  
7.41  
7.37  
7.37  
7.36  
7.35  
7.35  
7.34  
7.34  
7.34  
7.33  
7.32  
7.32  
7.31  
7.31  
7.30  
7.30  
7.02  
7.01  
7.01  
6.99  
6.98  
6.92  
6.90  
6.36  
3.08

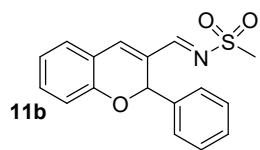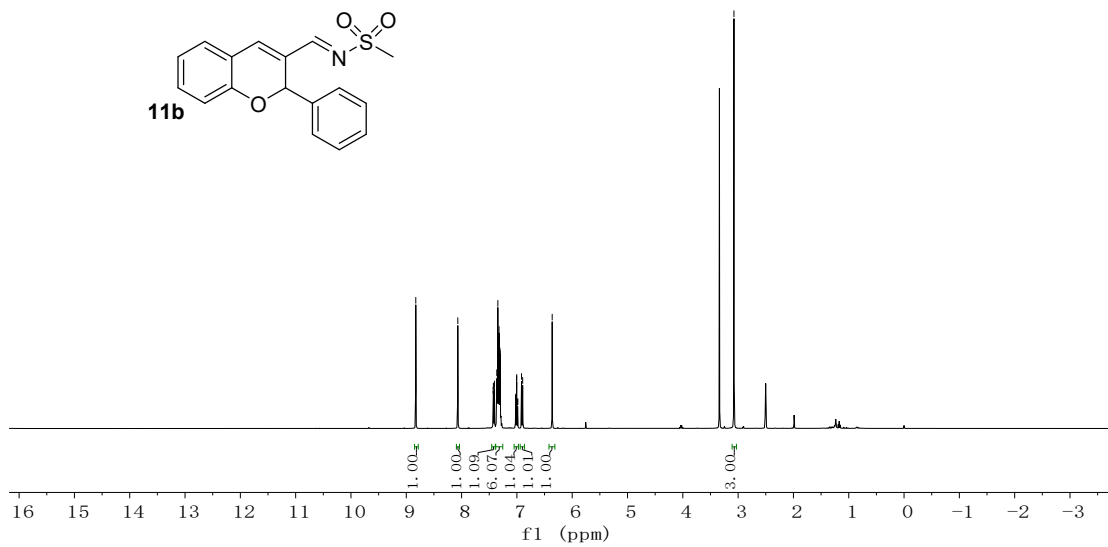

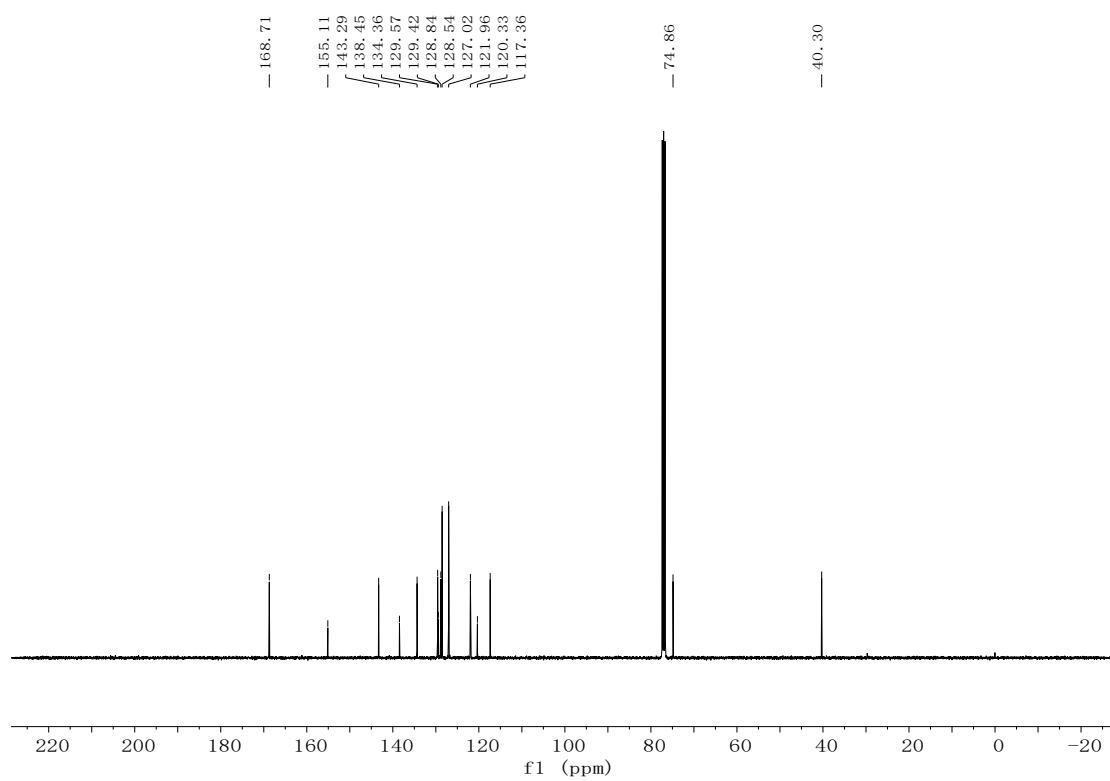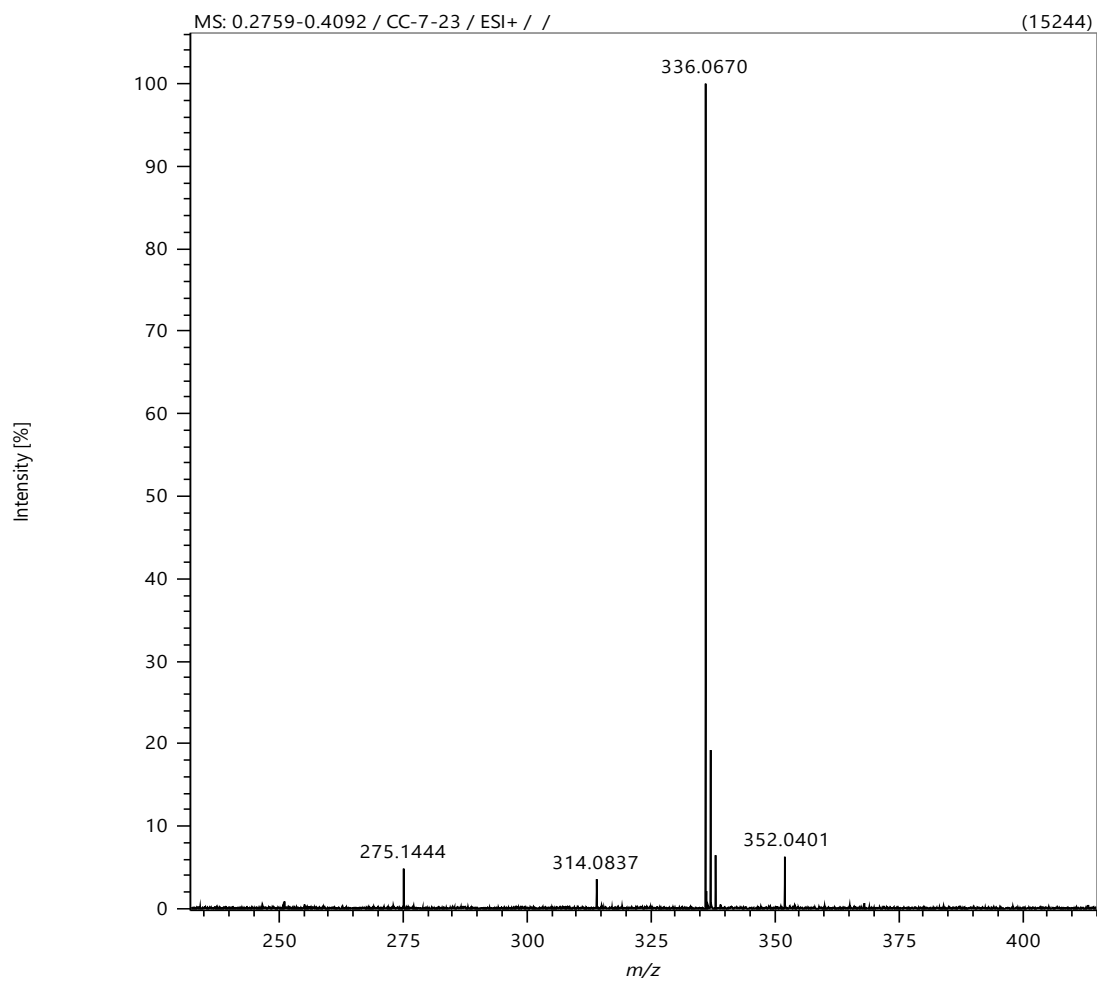

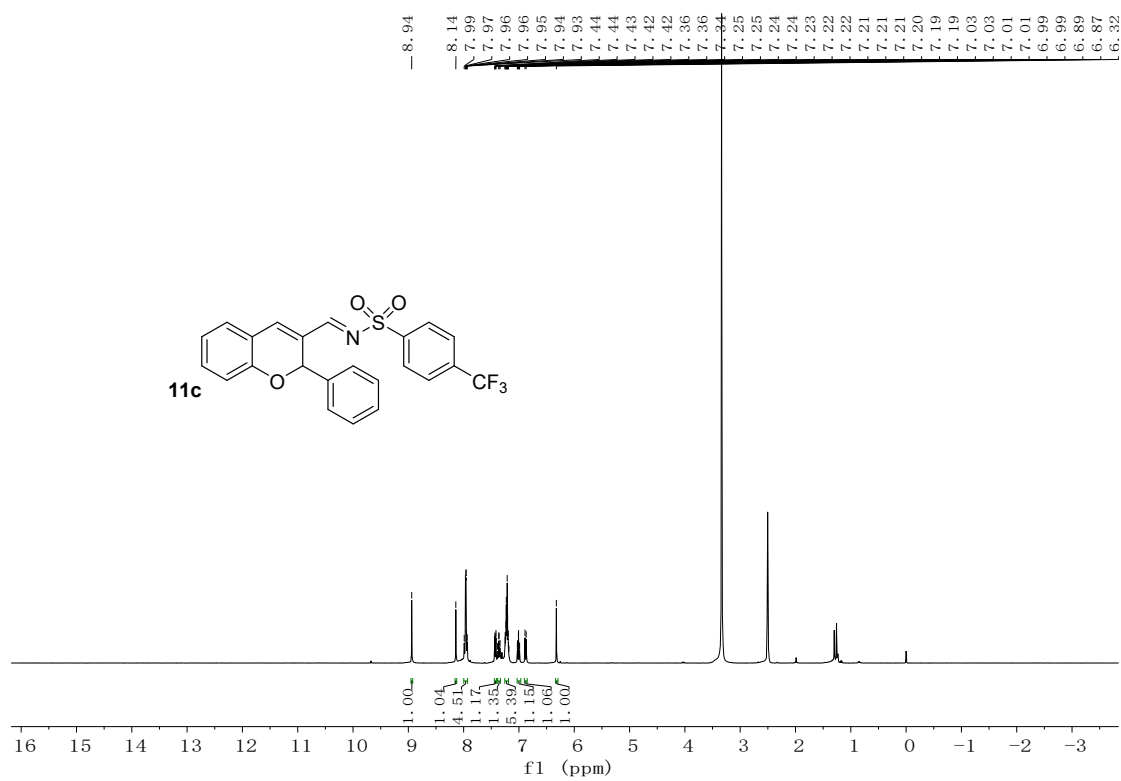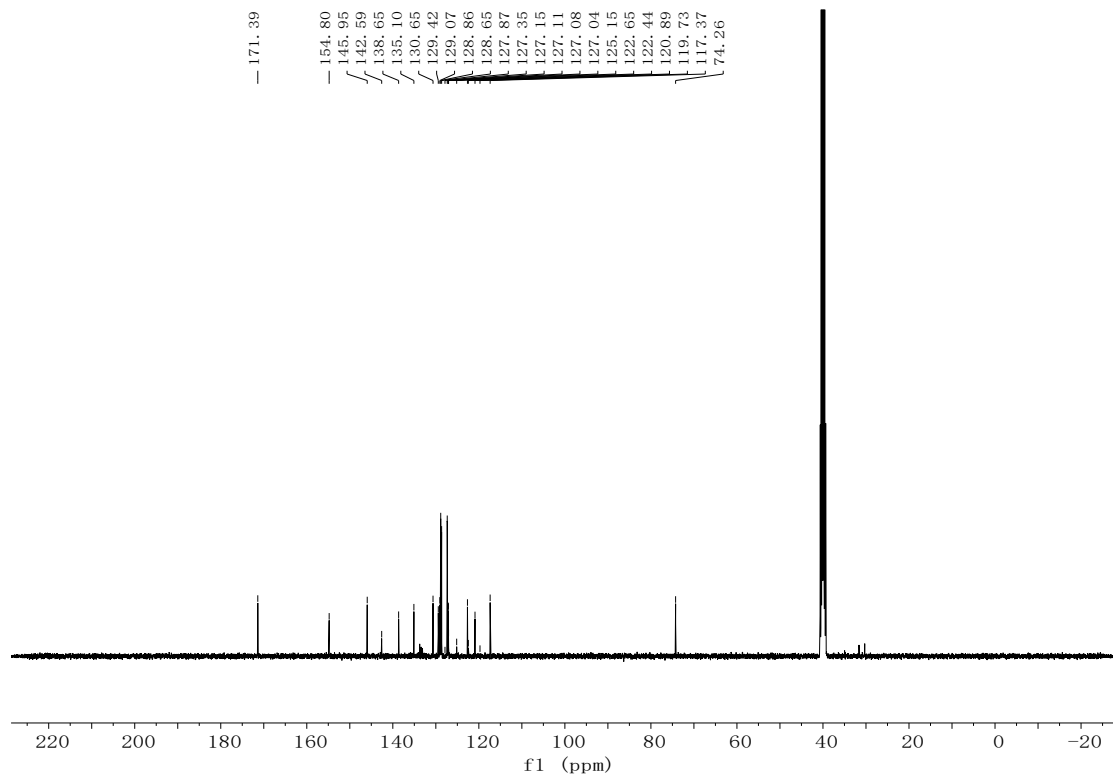

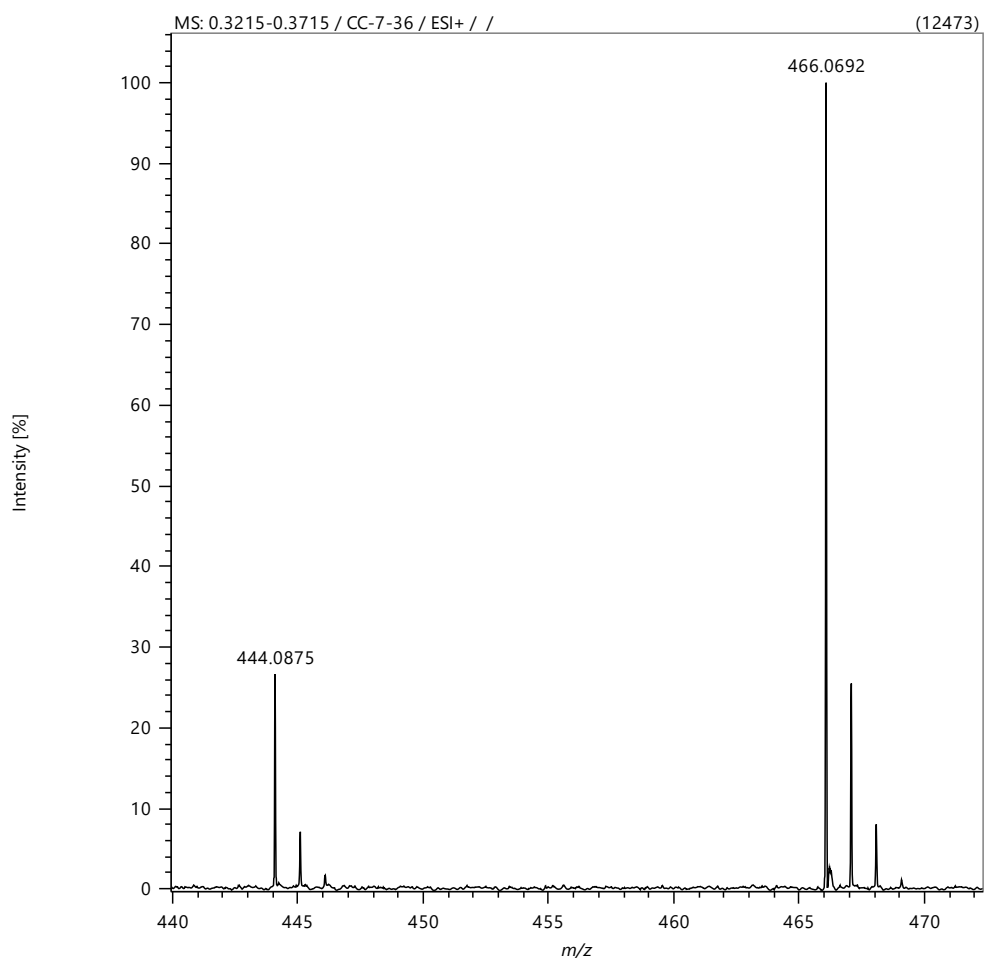

## 5. Crystallographic data

### Crystallographic data for 2a

**Table 1 Crystal data and structure refinement for 2a.**

|                   |                                                  |
|-------------------|--------------------------------------------------|
| CCDC              | 2121586                                          |
| Empirical formula | C <sub>16</sub> H <sub>12</sub> N <sub>6</sub> O |
| Formula weight    | 304.32                                           |
| Temperature/K     | 293.4(2)                                         |
| Crystal system    | orthorhombic                                     |
| Space group       | Pccn                                             |
| a/Å               | 25.5258(11)                                      |
| b/Å               | 16.0414(7)                                       |
| c/Å               | 7.3397(3)                                        |
| α/°               | 90                                               |
| β/°               | 90                                               |
| γ/°               | 90                                               |

|                                             |                                                               |
|---------------------------------------------|---------------------------------------------------------------|
| Volume/Å <sup>3</sup>                       | 3005.4(2)                                                     |
| Z                                           | 8                                                             |
| ρ <sub>calc</sub> /cm <sup>3</sup>          | 1.345                                                         |
| μ/mm <sup>-1</sup>                          | 0.742                                                         |
| F(000)                                      | 1264.0                                                        |
| Crystal size/mm <sup>3</sup>                | 0.4 × 0.2 × 0.1                                               |
| Radiation                                   | CuKα (λ = 1.54184)                                            |
| 2θ range for data collection/°              | 6.926 to 142.722                                              |
| Index ranges                                | -28 ≤ h ≤ 30, -19 ≤ k ≤ 13, -7 ≤ l ≤ 8                        |
| Reflections collected                       | 7901                                                          |
| Independent reflections                     | 2850 [R <sub>int</sub> = 0.0355, R <sub>sigma</sub> = 0.0334] |
| Data/restraints/parameters                  | 2850/0/208                                                    |
| Goodness-of-fit on F <sup>2</sup>           | 1.025                                                         |
| Final R indexes [I ≥ 2σ (I)]                | R <sub>1</sub> = 0.0598, wR <sub>2</sub> = 0.1651             |
| Final R indexes [all data]                  | R <sub>1</sub> = 0.0702, wR <sub>2</sub> = 0.1827             |
| Largest diff. peak/hole / e Å <sup>-3</sup> | 0.21/-0.24                                                    |

**Table 2 Fractional Atomic Coordinates (×10<sup>4</sup>) and Equivalent Isotropic Displacement Parameters (Å<sup>2</sup>×10<sup>3</sup>) for 2a. U<sub>eq</sub> is defined as 1/3 of the trace of the orthogonalised U<sub>ij</sub> tensor.**

| Atom | x          | y          | z          | U(eq)   |
|------|------------|------------|------------|---------|
| O001 | 3930.2(6)  | 4712.0(9)  | 5543.8(19) | 58.4(4) |
| N002 | 5100.0(6)  | 6222.9(11) | 2634(3)    | 59.6(5) |
| N003 | 4429.8(8)  | 6553.5(13) | -1272(3)   | 68.1(5) |
| N004 | 4241.7(8)  | 6491.4(13) | 267(3)     | 67.7(5) |
| N005 | 4955.6(7)  | 5666.0(12) | 1578(3)    | 65.4(5) |
| C006 | 4060.9(7)  | 5601.5(11) | 2857(3)    | 47.4(4) |
| C007 | 3738.9(7)  | 4133.1(11) | 2546(2)    | 46.0(4) |
| C008 | 3783.5(8)  | 6203.3(11) | 3650(3)    | 50.6(5) |
| C009 | 4072.0(7)  | 4731.6(11) | 3648(3)    | 48.4(4) |
| C00A | 3499.9(7)  | 6043.2(12) | 5322(3)    | 48.5(4) |
| C00B | 3579.0(7)  | 5281.5(12) | 6200(3)    | 49.1(5) |
| C00C | 4384.3(8)  | 5705.5(12) | 1171(3)    | 54.4(5) |
| N00D | 5270.0(9)  | 6702.5(15) | 3578(4)    | 86.0(7) |
| C00E | 3197.8(8)  | 4207.4(13) | 2483(3)    | 58.0(5) |
| C00F | 3327.7(9)  | 5090.9(14) | 7811(3)    | 59.0(5) |
| C00G | 3976.1(9)  | 3507.2(12) | 1554(3)    | 58.8(5) |
| N00H | 4584.4(11) | 6674.6(18) | -2681(3)   | 97.4(8) |
| C00I | 3160.1(8)  | 6613.7(13) | 6134(3)    | 59.6(5) |



|                 |            |         |         |
|-----------------|------------|---------|---------|
| C00J 2984.7(9)  | 5663.1(16) | 8570(3) | 66.5(6) |
| C00K 2901.2(9)  | 6418.3(16) | 7725(3) | 68.7(6) |
| C00L 3147.1(11) | 3042.7(15) | 457(3)  | 72.6(7) |
| C00M 2904.7(9)  | 3654.7(16) | 1456(3) | 68.0(6) |
| C00N 3682.6(11) | 2969.6(14) | 499(4)  | 73.9(7) |

**Table 3 Anisotropic Displacement Parameters ( $\text{\AA}^2 \times 10^3$ ) for 2a. The Anisotropic displacement factor exponent takes the form:  $-2\pi^2[h^2a^{*2}U_{11}+2hka^*b^*U_{12}+\dots]$ .**

| Atom | $U_{11}$ | $U_{22}$ | $U_{33}$  | $U_{23}$  | $U_{13}$  | $U_{12}$  |
|------|----------|----------|-----------|-----------|-----------|-----------|
| O001 | 67.6(9)  | 55.3(8)  | 52.4(8)   | 3.8(6)    | -0.6(6)   | 15.2(6)   |
| N002 | 45.5(9)  | 63.2(10) | 70.1(11)  | 6.2(9)    | -1.8(8)   | -3.4(7)   |
| N003 | 55.7(11) | 80.8(13) | 67.7(12)  | 14(1)     | -9.8(9)   | -17.5(9)  |
| N004 | 66.7(11) | 70.0(12) | 66.3(12)  | 13.6(9)   | 5.1(9)    | -2.0(9)   |
| N005 | 49.5(10) | 70.1(11) | 76.7(12)  | -10.4(10) | 4.8(9)    | -1.3(8)   |
| C006 | 41.1(9)  | 48.2(9)  | 53(1)     | -0.1(8)   | -3.7(8)   | -3.4(7)   |
| C007 | 46.2(9)  | 40.1(9)  | 51.8(10)  | 4.4(7)    | 3.9(7)    | 0.5(6)    |
| C008 | 49.3(10) | 43.9(9)  | 58.5(11)  | 0.4(8)    | -3.8(8)   | -1.3(7)   |
| C009 | 43.0(9)  | 47.6(9)  | 54.6(11)  | 0.3(8)    | -1.3(8)   | 5.5(7)    |
| C00A | 44.5(9)  | 47.5(9)  | 53.6(11)  | -6.5(8)   | -5.5(8)   | -1.0(7)   |
| C00B | 47.2(10) | 51.6(10) | 48.4(10)  | -6.5(8)   | -5.3(8)   | -0.8(7)   |
| C00C | 51.6(11) | 52.8(10) | 58.8(11)  | -1.7(9)   | 2.5(9)    | -6.2(7)   |
| N00D | 70.3(14) | 82.4(14) | 105.4(18) | -9.5(13)  | -21.6(13) | -8.2(11)  |
| C00E | 48.4(11) | 62.1(11) | 63.4(12)  | -5.3(10)  | 6.1(8)    | -0.6(8)   |
| C00F | 62.9(12) | 64.6(12) | 49.7(10)  | -0.8(9)   | -2.8(9)   | -3.1(9)   |
| C00G | 56.2(11) | 49.7(10) | 70.4(13)  | -4.4(9)   | 5.0(9)    | 5.1(8)    |
| N00H | 86.9(16) | 138(2)   | 67.0(13)  | 27.0(15)  | -2.2(12)  | -25.5(15) |
| C00I | 57.4(11) | 54.7(11) | 66.8(13)  | -9.8(10)  | -5.4(10)  | 6.4(8)    |
| C00J | 62.6(13) | 83.0(15) | 54.0(12)  | -9.5(11)  | 5.3(10)   | -4.7(10)  |
| C00K | 61.7(13) | 76.5(14) | 68.1(14)  | -19.5(12) | 6.4(11)   | 7.6(10)   |
| C00L | 79.7(16) | 62.2(13) | 75.9(15)  | -7.5(11)  | -0.8(12)  | -22.3(11) |
| C00M | 50.8(12) | 77.9(14) | 75.2(15)  | -4.1(12)  | 1.7(10)   | -13.9(10) |
| C00N | 85.2(17) | 54.2(12) | 82.2(16)  | -18.5(12) | 5.9(13)   | 0.2(10)   |

**Table 4 Bond Lengths for 2a.**

| Atom | Atom | Length/ $\text{\AA}$ | Atom | Atom | Length/ $\text{\AA}$ |
|------|------|----------------------|------|------|----------------------|
| O001 | C009 | 1.438(2)             | C007 | C00G | 1.380(3)             |
| O001 | C00B | 1.367(2)             | C008 | C00A | 1.447(3)             |
| N002 | N005 | 1.239(3)             | C00A | C00B | 1.396(3)             |
| N002 | N00D | 1.123(3)             | C00A | C00I | 1.395(3)             |
| N003 | N004 | 1.231(3)             | C00B | C00F | 1.380(3)             |

|                    |                    |
|--------------------|--------------------|
| N003 N00H 1.124(3) | C00E C00M 1.384(3) |
| N004 C00C 1.470(3) | C00F C00J 1.385(3) |
| N005 C00C 1.490(3) | C00G C00N 1.380(3) |
| C006 C008 1.332(3) | C00I C00K 1.378(3) |
| C006 C009 1.512(2) | C00J C00K 1.377(4) |
| C006 C00C 1.496(3) | C00L C00M 1.373(4) |
| C007 C009 1.516(3) | C00L C00N 1.372(4) |
| C007 C00E 1.387(3) |                    |

**Table 5 Bond Angles for 2a.**

| Atom Atom Atom Angle/°    | Atom Atom Atom Angle/°    |
|---------------------------|---------------------------|
| C00B O001 C009 119.40(14) | C00I C00A C00B 117.84(19) |
| N00D N002 N005 174.5(2)   | O001 C00B C00A 121.14(18) |
| N00H N003 N004 174.3(3)   | O001 C00B C00F 117.29(18) |
| N003 N004 C00C 112.7(2)   | C00F C00B C00A 121.49(19) |
| N002 N005 C00C 112.68(17) | N004 C00C N005 111.67(16) |
| C008 C006 C009 120.74(18) | N004 C00C C006 109.39(17) |
| C008 C006 C00C 125.04(17) | N005 C00C C006 111.69(17) |
| C00C C006 C009 114.21(16) | C00M C00E C007 120.1(2)   |
| C00E C007 C009 121.44(17) | C00B C00F C00J 119.4(2)   |
| C00G C007 C009 119.74(17) | C00N C00G C007 120.8(2)   |
| C00G C007 C00E 118.81(18) | C00K C00I C00A 120.8(2)   |
| C006 C008 C00A 120.54(18) | C00K C00J C00F 120.0(2)   |
| O001 C009 C006 112.78(15) | C00J C00K C00I 120.5(2)   |
| O001 C009 C007 111.17(15) | C00N C00L C00M 119.9(2)   |
| C006 C009 C007 111.66(15) | C00L C00M C00E 120.4(2)   |
| C00B C00A C008 118.31(17) | C00L C00N C00G 120.0(2)   |
| C00I C00A C008 123.84(19) |                           |

**Table 6 Hydrogen Atom Coordinates ( $\text{\AA} \times 10^4$ ) and Isotropic Displacement Parameters ( $\text{\AA}^2 \times 10^3$ ) for 2a.**

| Atom <i>x</i> | <i>y</i> | <i>z</i> | U(eq) |
|---------------|----------|----------|-------|
| H008 3772     | 6731     | 3127     | 61    |
| H009 4435     | 4534     | 3563     | 58    |
| H00C 4300     | 5247     | 341      | 65    |
| H00E 3032     | 4629     | 3133     | 70    |
| H00F 3388     | 4583     | 8384     | 71    |
| H00G 4338     | 3447     | 1597     | 71    |
| H00I 3108     | 7132     | 5596     | 72    |
| H00J 2811     | 5537     | 9649     | 80    |

|           |      |      |    |
|-----------|------|------|----|
| H00K 2668 | 6799 | 8232 | 82 |
| H00L 2949 | 2678 | -247 | 87 |
| H00M 2541 | 3698 | 1442 | 82 |
| H00N 3848 | 2558 | -183 | 89 |

### Experimental

Single crystals of C<sub>16</sub>H<sub>12</sub>N<sub>6</sub>O [**2a**] were obtained by slow evaporation of a mixture solution (*n*-hexane and ether) of the compound. A suitable crystal was selected and mounted in oil on a **New Gemini, Dual, Cu at home/near, EosS2** diffractometer. The crystal was kept at 293.4(2) K during data collection. Using Olex2 [1], the structure was solved with the ShelXT [2] structure solution program using Direct Methods and refined with the ShelXL [3] refinement package using Least Squares minimisation.

1. Dolomanov, O.V., Bourhis, L.J., Gildea, R.J., Howard, J.A.K. & Puschmann, H. (2009), *J. Appl. Cryst.* 42, 339-341.
2. Sheldrick, G.M. (2015). *Acta Cryst.* A71, 3-8.
3. Sheldrick, G.M. (2015). *Acta Cryst.* C71, 3-8.

### Crystal structure determination of [hl-cc-2-1]

**Crystal Data** for C<sub>16</sub>H<sub>12</sub>N<sub>6</sub>O (*M* = 304.32 g/mol): orthorhombic, space group Pccn (no. 56), *a* = 25.5258(11) Å, *b* = 16.0414(7) Å, *c* = 7.3397(3) Å, *V* = 3005.4(2) Å<sup>3</sup>, *Z* = 8, *T* = 293.4(2) K,  $\mu(\text{CuK}\alpha) = 0.742 \text{ mm}^{-1}$ , *D*<sub>calc</sub> = 1.345 g/cm<sup>3</sup>, 7901 reflections measured (6.926° ≤ 2 $\theta$  ≤ 142.722°), 2850 unique (*R*<sub>int</sub> = 0.0355, *R*<sub>sigma</sub> = 0.0334) which were used in all calculations. The final *R*<sub>1</sub> was 0.0598 (*I* > 2 $\sigma$ (*I*)) and *wR*<sub>2</sub> was 0.1827 (all data).

### Refinement model description

Number of restraints - 0, number of constraints - unknown.

Details:

#### 1. Fixed Uiso

At 1.2 times of:

All C(H) groups

#### 2.a Ternary CH refined with riding coordinates:

C009(H009), C00C(H00C)

#### 2.b Aromatic/amide H refined with riding coordinates:

C008(H008), C00E(H00E), C00F(H00F), C00G(H00G), C00I(H00I), C00J(H00J),  
C00K(H00K), C00L(H00L), C00M(H00M), C00N(H00N)

## Crystallographic data for 11a

**Table 1 Crystal data and structure refinement for 11a.**

|                   |                                                  |
|-------------------|--------------------------------------------------|
| CCDC              | 2121587                                          |
| Empirical formula | C <sub>17</sub> H <sub>12</sub> N <sub>2</sub> O |
| Formula weight    | 260.29                                           |
| Temperature/K     | 293.15                                           |
| Crystal system    | monoclinic                                       |

|                                             |                                                               |
|---------------------------------------------|---------------------------------------------------------------|
| Space group                                 | P2 <sub>1</sub> /c                                            |
| a/Å                                         | 6.1263(19)                                                    |
| b/Å                                         | 28.328(3)                                                     |
| c/Å                                         | 11.289(4)                                                     |
| α/°                                         | 90                                                            |
| β/°                                         | 136.87(6)                                                     |
| γ/°                                         | 90                                                            |
| Volume/Å <sup>3</sup>                       | 1339.5(12)                                                    |
| Z                                           | 4                                                             |
| ρ <sub>calc</sub> /g/cm <sup>3</sup>        | 1.291                                                         |
| μ/mm <sup>-1</sup>                          | 0.082                                                         |
| F(000)                                      | 544.0                                                         |
| Crystal size/mm <sup>3</sup>                | 0.35 × 0.3 × 0.25                                             |
| Radiation                                   | MoKα (λ = 0.71073)                                            |
| 2Θ range for data collection/°              | 6.012 to 52.744                                               |
| Index ranges                                | -7 ≤ h ≤ 7, -35 ≤ k ≤ 31, -9 ≤ l ≤ 14                         |
| Reflections collected                       | 5598                                                          |
| Independent reflections                     | 2734 [R <sub>int</sub> = 0.0201, R <sub>sigma</sub> = 0.0343] |
| Data/restraints/parameters                  | 2734/0/181                                                    |
| Goodness-of-fit on F <sup>2</sup>           | 1.049                                                         |
| Final R indexes [I ≥ 2σ (I)]                | R <sub>1</sub> = 0.0503, wR <sub>2</sub> = 0.1133             |
| Final R indexes [all data]                  | R <sub>1</sub> = 0.0757, wR <sub>2</sub> = 0.1338             |
| Largest diff. peak/hole / e Å <sup>-3</sup> | 0.15/-0.18                                                    |

**Table 2 Fractional Atomic Coordinates (×10<sup>4</sup>) and Equivalent Isotropic Displacement Parameters (Å<sup>2</sup>×10<sup>3</sup>) for 11a. U<sub>eq</sub> is defined as 1/3 of the trace of the orthogonalised U<sub>ij</sub> tensor.**

| Atom | x        | y          | z          | U(eq)   |
|------|----------|------------|------------|---------|
| O1   | -1752(3) | 1427.4(5)  | 549.2(15)  | 58.5(4) |
| N1   | 7555(3)  | 833.7(5)   | 4477.5(18) | 49.0(4) |
| N2   | 12865(4) | 445.6(7)   | 6484(2)    | 76.1(6) |
| C1   | 1558(3)  | 1315.5(6)  | 2119(2)    | 44.6(4) |
| C2   | 1986(4)  | 815.3(6)   | 2700(2)    | 42.2(4) |
| C3   | -495(4)  | 563.0(6)   | 2127(2)    | 45.6(4) |
| C4   | -3664(4) | 752.1(6)   | 881(2)     | 46.2(4) |
| C5   | -6277(4) | 515.0(7)   | 332(2)     | 57.9(5) |
| C6   | -9278(4) | 707.0(9)   | -902(3)    | 69.1(6) |
| C7   | -9704(4) | 1140.9(10) | -1602(2)   | 74.0(7) |
| C8   | -7181(4) | 1384.2(8)  | -1090(2)   | 65.4(6) |
| C9   | -4158(4) | 1188.1(7)  | 148(2)     | 49.8(5) |

|     |          |           |         |         |
|-----|----------|-----------|---------|---------|
| C10 | 2890(4)  | 1673.3(6) | 3503(2) | 44.0(4) |
| C11 | 5079(5)  | 1999.2(7) | 3978(3) | 69.1(6) |
| C12 | 6350(6)  | 2329.5(9) | 5232(4) | 97.9(9) |
| C13 | 5442(6)  | 2337.4(9) | 6021(4) | 98.4(9) |
| C14 | 3250(6)  | 2018.0(9) | 5572(3) | 83.6(7) |
| C15 | 1988(4)  | 1683.5(7) | 4314(2) | 59.4(5) |
| C16 | 5098(4)  | 610.1(6)  | 3902(2) | 46.9(4) |
| C17 | 10378(4) | 607.7(7)  | 5574(2) | 53.5(5) |

**Table 3 Anisotropic Displacement Parameters ( $\text{\AA}^2 \times 10^3$ ) for 11a. The Anisotropic displacement factor exponent takes the form:  $-2\pi^2[h^2a^*2U_{11}+2hka^*b^*U_{12}+\dots]$ .**

| Atom | $U_{11}$ | $U_{22}$  | $U_{33}$ | $U_{23}$  | $U_{13}$ | $U_{12}$  |
|------|----------|-----------|----------|-----------|----------|-----------|
| O1   | 45.6(7)  | 58.4(8)   | 44.1(7)  | 12.9(6)   | 24.0(6)  | 6.6(6)    |
| N1   | 40.1(8)  | 50.1(9)   | 47.8(8)  | -0.7(7)   | 29.1(7)  | 1.3(7)    |
| N2   | 42.7(9)  | 74.1(12)  | 79.3(12) | -4.2(10)  | 34.2(9)  | 5.1(9)    |
| C1   | 38.6(9)  | 48.0(10)  | 40.9(9)  | 2.9(8)    | 27.0(8)  | 2.5(7)    |
| C2   | 38.1(8)  | 41.2(9)   | 38.6(8)  | -2.4(8)   | 25.2(7)  | 1.3(7)    |
| C3   | 43.3(9)  | 39.0(9)   | 43.5(9)  | -2.4(8)   | 28.1(8)  | -0.1(7)   |
| C4   | 37.6(9)  | 51.8(10)  | 37.0(8)  | -9.6(8)   | 23.4(7)  | -1.6(8)   |
| C5   | 47.0(10) | 66.7(13)  | 52.7(10) | -18.0(10) | 34.0(9)  | -9.2(9)   |
| C6   | 39.8(10) | 95.7(17)  | 56.9(12) | -25.9(13) | 30.5(10) | -10.1(11) |
| C7   | 38.9(11) | 102.6(19) | 44.9(11) | -11.2(13) | 19.2(9)  | 12.2(12)  |
| C8   | 50.2(11) | 73.5(14)  | 41.6(9)  | 1.3(10)   | 23.6(9)  | 14.0(10)  |
| C9   | 39.0(9)  | 57.5(11)  | 33.6(8)  | -5.0(8)   | 20.3(8)  | 3.9(8)    |
| C10  | 40.8(9)  | 36.7(9)   | 45.3(9)  | 4.0(8)    | 28.5(8)  | 5.4(7)    |
| C11  | 71.8(13) | 50.3(12)  | 87.6(15) | -8.4(12)  | 58.9(12) | -10.5(10) |
| C12  | 89.7(18) | 60.4(15)  | 129(2)   | -35.8(16) | 75.3(18) | -24.2(13) |
| C13  | 86.0(18) | 77.1(18)  | 93.5(18) | -43.6(15) | 53.2(16) | -8.6(14)  |
| C14  | 84.8(16) | 89.3(17)  | 74.3(14) | -16.6(14) | 57.2(14) | 8.9(14)   |
| C15  | 58.8(11) | 59.8(12)  | 59.6(11) | -5.0(10)  | 43.2(10) | -0.2(9)   |
| C16  | 42.5(9)  | 42.8(10)  | 44.8(9)  | 0.9(8)    | 28.6(8)  | 2.8(8)    |
| C17  | 41.4(10) | 50.9(11)  | 57.0(10) | -6.8(9)   | 32.3(9)  | -3.5(8)   |

**Table 4 Bond Lengths for 11a.**

| Atom | Atom | Length/ $\text{\AA}$ | Atom | Atom | Length/ $\text{\AA}$ |
|------|------|----------------------|------|------|----------------------|
| O1   | C1   | 1.452(3)             | C4   | C9   | 1.392(3)             |
| O1   | C9   | 1.365(2)             | C5   | C6   | 1.370(3)             |
| N1   | C16  | 1.289(2)             | C6   | C7   | 1.379(3)             |
| N1   | C17  | 1.345(2)             | C7   | C8   | 1.376(3)             |
| N2   | C17  | 1.141(2)             | C8   | C9   | 1.383(3)             |

|    |     |          |     |     |          |
|----|-----|----------|-----|-----|----------|
| C1 | C2  | 1.502(2) | C10 | C11 | 1.374(2) |
| C1 | C10 | 1.507(2) | C10 | C15 | 1.373(2) |
| C2 | C3  | 1.343(2) | C11 | C12 | 1.370(3) |
| C2 | C16 | 1.428(2) | C12 | C13 | 1.352(4) |
| C3 | C4  | 1.431(3) | C13 | C14 | 1.373(3) |
| C4 | C5  | 1.397(2) | C14 | C15 | 1.382(3) |

**Table 5 Bond Angles for 11a.**

| Atom | Atom | Atom | Angle/°    | Atom | Atom | Atom | Angle/°    |
|------|------|------|------------|------|------|------|------------|
| C9   | O1   | C1   | 120.31(14) | C7   | C8   | C9   | 119.2(2)   |
| C16  | N1   | C17  | 118.29(17) | O1   | C9   | C4   | 121.99(15) |
| O1   | C1   | C2   | 112.46(13) | O1   | C9   | C8   | 117.47(19) |
| O1   | C1   | C10  | 109.63(14) | C8   | C9   | C4   | 120.47(18) |
| C2   | C1   | C10  | 113.10(14) | C11  | C10  | C1   | 119.53(17) |
| C3   | C2   | C1   | 121.07(15) | C15  | C10  | C1   | 121.88(16) |
| C3   | C2   | C16  | 119.86(17) | C15  | C10  | C11  | 118.59(18) |
| C16  | C2   | C1   | 119.06(14) | C12  | C11  | C10  | 121.3(2)   |
| C2   | C3   | C4   | 121.36(17) | C13  | C12  | C11  | 119.7(2)   |
| C5   | C4   | C3   | 123.33(18) | C12  | C13  | C14  | 120.5(2)   |
| C9   | C4   | C3   | 117.86(15) | C13  | C14  | C15  | 119.6(2)   |
| C9   | C4   | C5   | 118.79(17) | C10  | C15  | C14  | 120.3(2)   |
| C6   | C5   | C4   | 120.9(2)   | N1   | C16  | C2   | 122.48(17) |
| C5   | C6   | C7   | 119.3(2)   | N2   | C17  | N1   | 174.3(2)   |
| C8   | C7   | C6   | 121.37(19) |      |      |      |            |

**Table 6 Torsion Angles for 11a.**

| A  | B   | C   | D   | Angle/°     | A   | B   | C   | D   | Angle/°     |
|----|-----|-----|-----|-------------|-----|-----|-----|-----|-------------|
| O1 | C1  | C2  | C3  | -18.6(2)    | C5  | C4  | C9  | O1  | -176.26(15) |
| O1 | C1  | C2  | C16 | 162.48(14)  | C5  | C4  | C9  | C8  | 0.6(3)      |
| O1 | C1  | C10 | C11 | -108.51(18) | C5  | C6  | C7  | C8  | 0.1(3)      |
| O1 | C1  | C10 | C15 | 71.7(2)     | C6  | C7  | C8  | C9  | 0.2(3)      |
| C1 | O1  | C9  | C4  | -19.3(2)    | C7  | C8  | C9  | O1  | 176.37(16)  |
| C1 | O1  | C9  | C8  | 163.78(15)  | C7  | C8  | C9  | C4  | -0.6(3)     |
| C1 | C2  | C3  | C4  | 3.0(3)      | C9  | O1  | C1  | C2  | 26.4(2)     |
| C1 | C2  | C16 | N1  | -1.9(2)     | C9  | O1  | C1  | C10 | -100.30(17) |
| C1 | C10 | C11 | C12 | -179.89(19) | C9  | C4  | C5  | C6  | -0.2(3)     |
| C1 | C10 | C15 | C14 | -179.73(17) | C10 | C1  | C2  | C3  | 106.29(19)  |
| C2 | C1  | C10 | C11 | 125.12(18)  | C10 | C1  | C2  | C16 | -72.7(2)    |
| C2 | C1  | C10 | C15 | -54.7(2)    | C10 | C11 | C12 | C13 | 0.0(4)      |
| C2 | C3  | C4  | C5  | -175.75(16) | C11 | C10 | C15 | C14 | 0.5(3)      |

|              |             |                 |             |
|--------------|-------------|-----------------|-------------|
| C2 C3 C4 C9  | 6.3(3)      | C11 C12 C13 C14 | -0.2(4)     |
| C3 C2 C16 N1 | 179.10(16)  | C12 C13 C14 C15 | 0.6(4)      |
| C3 C4 C5 C6  | -178.13(16) | C13 C14 C15 C10 | -0.7(3)     |
| C3 C4 C9 O1  | 1.8(2)      | C15 C10 C11 C12 | -0.1(3)     |
| C3 C4 C9 C8  | 178.65(16)  | C16 C2 C3 C4    | -178.04(14) |
| C4 C5 C6 C7  | -0.2(3)     | C17 N1 C16 C2   | -178.35(15) |

**Table 7 Hydrogen Atom Coordinates ( $\text{\AA}\times 10^4$ ) and Isotropic Displacement Parameters ( $\text{\AA}^2\times 10^3$ ) for 11a.**

| Atom | <i>x</i>  | <i>y</i> | <i>z</i> | U(eq) |
|------|-----------|----------|----------|-------|
| H1   | 2752.08   | 1348.86  | 1850.43  | 53    |
| H3   | -147.02   | 259.08   | 2548.37  | 55    |
| H5   | -5976.77  | 222.97   | 810.39   | 69    |
| H6   | -11007.26 | 546.56   | -1263.05 | 83    |
| H7   | -11739.07 | 1271.77  | -2437.88 | 89    |
| H8   | -7504.87  | 1676.95  | -1571.27 | 78    |
| H11  | 5709.86   | 1995.34  | 3438.62  | 83    |
| H12  | 7829.8    | 2547.39  | 5537.94  | 117   |
| H13  | 6308.36   | 2560.87  | 6875.17  | 118   |
| H14  | 2618.68   | 2026.65  | 6111.33  | 100   |
| H15  | 520.84    | 1464.31  | 4016.04  | 71    |
| H16  | 5363.25   | 303.51   | 4285.05  | 56    |

### Experimental

Single crystals of  $\text{C}_{17}\text{H}_{12}\text{N}_2\text{O}$  [**11a**] were obtained by slow evaporation of a mixture solution (*n*-hexane and ether) of the compound. A suitable crystal was selected and mounted in oil on a **Xcalibur, Eos** diffractometer. The crystal was kept at 293.15 K during data collection. Using Olex2 [1], the structure was solved with the ShelXS [2] structure solution program using Direct Methods and refined with the ShelXL [3] refinement package using Least Squares minimisation.

1. Dolomanov, O.V., Bourhis, L.J., Gildea, R.J., Howard, J.A.K. & Puschmann, H. (2009), *J. Appl. Cryst.* 42, 339-341.
2. Sheldrick, G.M. (2008). *Acta Cryst.* A64, 112-122.
3. Sheldrick, G.M. (2015). *Acta Cryst.* C71, 3-8.

### Crystal structure determination of [11a]

**Crystal Data** for  $\text{C}_{17}\text{H}_{12}\text{N}_2\text{O}$  ( $M=260.29$  g/mol): monoclinic, space group  $P2_1/c$  (no. 14),  $a = 6.1263(19)$   $\text{\AA}$ ,  $b = 28.328(3)$   $\text{\AA}$ ,  $c = 11.289(4)$   $\text{\AA}$ ,  $\beta = 136.87(6)^\circ$ ,  $V = 1339.5(12)$   $\text{\AA}^3$ ,  $Z = 4$ ,  $T = 293.15$  K,  $\mu(\text{MoK}\alpha) = 0.082$   $\text{mm}^{-1}$ ,  $D_{\text{calc}} = 1.291$   $\text{g/cm}^3$ , 5598 reflections measured ( $6.012^\circ \leq 2\theta \leq 52.744^\circ$ ), 2734 unique ( $R_{\text{int}} = 0.0201$ ,  $R_{\text{sigma}} = 0.0343$ ) which were used in all calculations. The final  $R_1$  was 0.0503 ( $I > 2\sigma(I)$ ) and  $wR_2$  was 0.1338 (all data).

### Refinement model description

Number of restraints - 0, number of constraints - unknown.

Details:

1. Fixed Uiso

At 1.2 times of:

All C(H) groups

2.a Ternary CH refined with riding coordinates:

C1(H1)

2.b Aromatic/amide H refined with riding coordinates:

C3(H3), C5(H5), C6(H6), C7(H7), C8(H8), C11(H11), C12(H12), C13(H13),

C14(H14), C15(H15), C16(H16)

## 6. Optimization of The Reaction Conditions

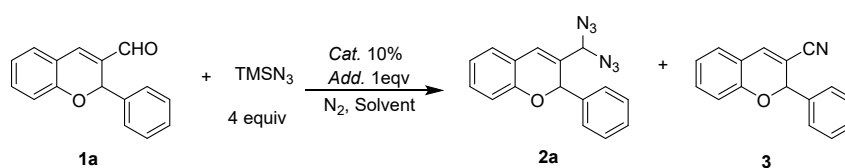

| Entry <sup>a</sup> | Cat. 10%mol                                             | Add. 1<br>eqv. | Solvent    | <b>2a</b> Cmpd. % <sup>b</sup> | <b>3</b> Cmpd. % <sup>b</sup> | <b>2a:3</b>  |
|--------------------|---------------------------------------------------------|----------------|------------|--------------------------------|-------------------------------|--------------|
| 1                  | Fe(acac) <sub>3</sub>                                   | -              | DCM        | 0                              | -                             | 0:100        |
| 2                  | Cu(AcO) <sub>2</sub>                                    | -              | DCM        | 0                              | -                             | 0:100        |
| 3                  | Rh <sub>2</sub> (AcO) <sub>2</sub>                      | -              | DCM        | 0                              | -                             | 0:100        |
| 4                  | AlCl <sub>3</sub>                                       | -              | DCM        | NR <sup>c</sup>                | -                             | -            |
| 5                  | Cu(TfO) <sub>2</sub>                                    | -              | DCM        | 42                             | 20                            | 2.07:1       |
| 6                  | AgTfO                                                   | -              | DCM        | 44                             | 18                            | 2.38:1       |
| 7                  | Bi(TfO) <sub>3</sub>                                    | -              | DCM        | 30                             | 4.                            | 7.09:1       |
| <b>8</b>           | <b>Yb(TfO)<sub>3</sub></b>                              | <b>-</b>       | <b>DCM</b> | <b>70</b>                      | <b>0</b>                      | <b>100:0</b> |
| 9                  | LiTfO                                                   | -              | DCM        | NR                             | -                             | -            |
| 10                 | In(TfO) <sub>3</sub>                                    | -              | DCM        | 39                             | 16                            | 2.40:1       |
| 11                 | Cu(ClO <sub>4</sub> ) <sub>2</sub>                      | -              | DCM        | 41                             | 29                            | 1.42:1       |
| 12                 | Zn(TfO) <sub>2</sub>                                    | -              | DCM        | 36                             | 0                             | 100:0        |
| 13                 | AgSbF <sub>6</sub>                                      | -              | DCM        | NR                             | -                             | -            |
| 14                 | Sm(TfO) <sub>3</sub>                                    | -              | DCM        | 22                             | 0                             | 100:0        |
| 15                 | Cu[(CH <sub>3</sub> CN) <sub>4</sub> ClO <sub>4</sub> ] | -              | DCM        | 22                             | 4                             | 5.37:1       |
| 16                 | CoMoO <sub>4</sub>                                      | -              | DCM        | NR                             | -                             | -            |
| 17                 | LiClO <sub>4</sub>                                      | -              | DCM        | NR                             | -                             | -            |
| 18                 | Bi(NO <sub>3</sub> ) <sub>3</sub> ·5H <sub>2</sub> O    | -              | DCM        | trace                          | -                             | -            |



|    |                      |                                |                    |                 |    |        |
|----|----------------------|--------------------------------|--------------------|-----------------|----|--------|
| 19 | RuCl <sub>3</sub>    | -                              | DCM                | NR              | -  | -      |
| 20 | NiCl <sub>2</sub>    | -                              | DCM                | NR              | -  | -      |
| 21 | Sc(TfO) <sub>3</sub> | -                              | DCM                | 47              | 0  | 100:0  |
| 22 | Yb(TfO) <sub>3</sub> | K <sub>2</sub> CO <sub>3</sub> | DCM                | trace           | 0  | -      |
| 23 | Yb(TfO) <sub>3</sub> | PhCOOH                         | DCM                | 27              | 4  | 6.52:1 |
| 24 | Yb(TfO) <sub>3</sub> | TMSTfO                         | DCM                | 0               |    | 0:100  |
| 25 | Yb(TfO) <sub>3</sub> | -                              | CH <sub>3</sub> OH | ND <sup>d</sup> | ND | -      |
| 26 | Yb(TfO) <sub>3</sub> | -                              | CH <sub>3</sub> CN | 9               | 0  | 100:0  |
| 27 | Yb(TfO) <sub>3</sub> | -                              | THF                | 22              | 0  | 100:0  |
| 28 | Yb(TfO) <sub>3</sub> | -                              | Toluen             | 19              | 0  | 100:0  |
|    |                      |                                | e                  |                 |    |        |
| 29 | Yb(TfO) <sub>3</sub> | -                              | CHCl <sub>3</sub>  | 20              | 0  | 100:0  |
| 30 | Yb(TfO) <sub>3</sub> | 40°C                           | DCM                | 20              | 4  | 4.99:1 |
| 31 | Yb(TfO) <sub>3</sub> | 50°C                           | DCM                | 17              | 6  | 2.82:1 |
| 32 | Yb(TfO) <sub>3</sub> | 60°C                           | DCM                | 16              | 8  | 1.92:1 |

<sup>a</sup>**1a** (0.21 mmol), TMSN<sub>3</sub> (0.84 mmol), catalyst (0.02 mmol). <sup>b</sup>Isolated yields. <sup>c</sup>No reaction. <sup>d</sup>Not detected.

## 7. Antiproliferative Activity Data

In 5% CO<sub>2</sub> humidified incubator, the A549 was cultured in RPMI 1640 medium which mixed with 10% FBS at 37 °C. Cells were plated in a 96-well plate ranged 2000–4000 cells per well. After 24 h culturing, different concentrations of the compounds were added and cultured for 48 h. After treating with 10% trichloroacetic acid (TCA) at 4 °C for 1 hour, each well was washed with distilled water for 5 times and dry naturally. Subsequently, the cells were stained by 0.4% (w/v) SRB at room temperature for 20 minutes, followed washing with 1% glacial acetic acid for 5 times to remove the excess unbound SRB dye. After the SRB bounded protein was dissolved in 10 mM tris(hydroxymethylamino)methane (Tris) for 15 min, the absorbance was read by a microtiter-plate reader at 540 nm and the IC<sub>50</sub> values were calculated according to the corresponding concentrations and the inhibitory ratios.

|                     |         |         |         |          |         |          |          |        |
|---------------------|---------|---------|---------|----------|---------|----------|----------|--------|
| Concentration (μM)  | 10.0000 | 1.11111 | 0.37037 | 0.123457 | 0.04115 | 0.013717 | 0.004572 | 0      |
|                     |         | 1       |         |          | 2       |          |          |        |
| OD Value            | 0.9317  | 2.5665  | 2.8071  | 2.8099   | 2.8385  | 2.8766   | 2.8892   | 3.5295 |
| background OD Value | 0.1184  | -       | -       | -        | -       | -        | -        | -      |

## 8. Quantitative Transformation of $\alpha$ , $\beta$ -Unsaturated Diazides

### into Bistriazole

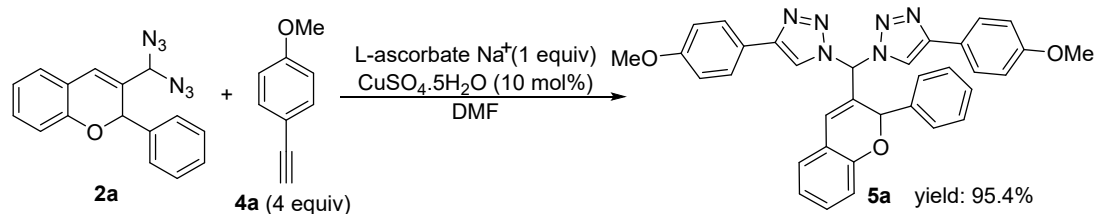

## References

- 1 S. Kang, J. Baek, Y. Ko, C. Im and Y. Park, *Synlett*, 2013, **24**, 630–634. Asymmetric Preparation of New N,N-Dialkyl-2-amino-1,1,2-triphenylethanol Catalysts and a Kinetic Resolution in the Addition of Diethylzinc to Flavene-3-carbaldehydes
- 2 S. Nayak, S. Chakroborty, S. Bhakta, P. Panda, S. Mohapatra, S. Kumar, P. Jena and C. Purohit, *Lett. Org. Chem.*, 2015, **12**, 352–358. Design and Synthesis of (E)-4-(2-Phenyl-2H-chromen-3-yl)but-3-en-2-ones and Evaluation of their In Vitro Antimicrobial Activity
- 3 P. Panda, S. Nayak, S. K. Sahoo, S. Mohapatra, D. Nayak, R. Pradhan and C. N. Kundu, *RSC Adv.*, 2018, **8**, 16802–16814. Diastereoselective synthesis of novel spiro indanone fused pyrano[3,2- c ]chromene derivatives following hetero-Diels–Alder reaction and in vitro anticancer studies
- 4 G. V. Kryshtal, G. M. Zhdankina and S. G. Zlotin, *European J. Org. Chem.*, 2005, 2822–2827. Tetraalkylammonium and 1,3-dialkylimidazolium salts with fluorinated anions as recoverable phase-transfer catalysts in solid base-promoted cross-aldol
- 5 L. Chen, W. Teng, X. Le Geng, Y. F. Zhu, Y. H. Guan and X. Fan, *Appl. Organomet. Chem.*, 2017, **31**, 1–6. Facile synthesis of indene and fluorene derivatives through AlCl<sub>3</sub>-catalyzed cyclization of in situ formed iminium ions
- 6 E. Ji, H. Meng, Y. Zheng, V. Ramadoss and Y. Wang, *European J. Org. Chem.*, 2019, **2019**, 7367–7371. Copper-Catalyzed Stereospecific Hydroboration of Internal Allylic Alcohols
